# Supplementary material for: A formal (5+1) annulation reaction from heterodimerization of two different isocyanides: stereoselective synthesis of 2H-benzo[b][1,4]oxazin-2-one
Source: Royal Society of Chemistry journal article supplement (doi:10.1039/c9cc06678k), 2019-01-01

# **A formal (5+1) annulation reaction from heterodimerization of two different isocyanides: stereoselective synthesis of 2*H*-benzo[*b*][1,4]oxazin-2-one**

Shikuan Su,<sup>a,b</sup> Jie Hu,<sup>a</sup> Yongmei Cui,<sup>a</sup> Chongrong Tang,<sup>a</sup> Yali Chen,<sup>\*a,b</sup> and Jian Li<sup>\*a</sup>

<sup>a</sup> School of Materials Science and Engineering, Shanghai University, 99 Shangda Road, Shanghai 200444, P. R. China

<sup>b</sup> Department of Chemistry, Center for Supramolecular Chemistry and Catalysis, College of Sciences & Institute for Sustainable Energy, Shanghai University, 99 Shangda Road, Shanghai 200444, P. R. China

E-mail: ylchen@shu.edu.cn and lijian@shu.edu.cn

## **Supporting Information**

### **Table of Contents**

|          |                                                                          |            |
|----------|--------------------------------------------------------------------------|------------|
| <b>1</b> | <b>General Information</b>                                               | <b>S2</b>  |
| <b>2</b> | <b>Synthetic Procedures</b>                                              | <b>S2</b>  |
| <b>3</b> | <b>Optimization of Reaction Conditions</b>                               | <b>S6</b>  |
| <b>4</b> | <b>Control Experiments and Mechanistic Studies</b>                       | <b>S8</b>  |
| <b>5</b> | <b>Characterization Data</b>                                             | <b>S15</b> |
|          | Spectroscopic Data of All Compounds                                      | S15        |
| <b>6</b> | <b><sup>1</sup>H NMR and <sup>13</sup>C NMR Spectra of All Compounds</b> | <b>S25</b> |

## 1 General Information

The NMR spectra were recorded on Bruker AC – 500 spectrometer (500 MHz for  $^1\text{H}$  NMR and 125 MHz for  $^{13}\text{C}$  NMR) with  $\text{CDCl}_3$  as the solvent and TMS as internal reference.  $^1\text{H}$  NMR spectral data were reported as follows: chemical shift ( $\delta$ , ppm), multiplicity, integration, and coupling constant (Hz).  $^{13}\text{C}$  NMR spectral data were reported in terms of the chemical shift. The following abbreviations were used to indicate multiplicities: s = singlet; d = doublet; t = triplet; q = quartet; m = multiplet. Low-resolution mass spectra were obtained on a Shimadzu LCMS-2010EV spectrometer in ESI mode and reported as  $m/z$ . High-resolution mass spectra (HRMS) were recorded on a Bruker Daltonics, Inc. APEXIII 7.0 TESLA FTMS instrument. Melting points were obtained on a X-4 digital melting point apparatus without correction. Chemical yields referred to pure isolated product. Purification of products was accomplished by column chromatography packed with silica gel. Unless otherwise stated, anhydrous solvents were used in all cases.

## 2 Synthetic Procedures

### 2.1 Representative procedure for the preparation of substrates 1

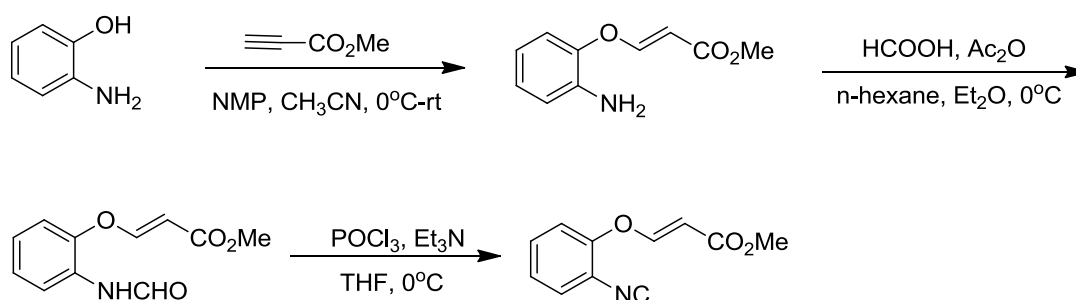

**Step 1:** In a 100 mL round-bottom flask, a mixture of 2-aminophenol (20 mmol, 1 equiv) propiolate (24 mmol, 1.2 equiv.) was dissolved in acetonitrile (60 mL) and was cooled to  $0^\circ\text{C}$ . Then N-methylmorpholine (1.2 mmol, 0.06 equiv.) was added into the reaction mixture. The reaction mixture was allowed to warm to room temperature and stirred for 12 h. After the solvent was removed, the crude product was purified by column chromatography to afford (E)-methyl 3-(2-aminophenoxy)acrylate (3.32 g, 86%) as a yellow liquid.<sup>1</sup>

**Step 2:** Acetyl formyl anhydride (prepared by stirring 2.0 equiv of acetic anhydride and 2.0 equiv of formic acid for 2 h at  $55^\circ\text{C}$ ) was added dropwise to a solution of (E)-methyl 3-(2-aminophenoxy)

acrylate (3.32 g, 17.2 mmol, 1.0 equiv) in Et<sub>2</sub>O at 0 °C, and the mixture was stirred for 0.5 h at 0 °C, and then filtered to give (*E*)-methyl 3-(2-formamidophenoxy)acrylate (3.42 g, 90%) as a white solid.

**Step 3:** A solution of (*E*)-methyl 3-(2-formamidophenoxy)acrylate (3.42 g, 15.48 mmol, 1.0 equiv) and NEt<sub>3</sub> (69.66 mmol, 4.5 equiv) in THF (100 mL) was cooled at 0 °C, then POCl<sub>3</sub> (23.22 mmol, 1.5 equiv) was added dropwise. After the reaction was completed, a saturated Na<sub>2</sub>CO<sub>3</sub> aqueous solution was added at 0 °C and the mixture was extracted with EA (3 × 100 mL). The combined organic phases were dried over anhydrous Na<sub>2</sub>SO<sub>4</sub>, filtered, and concentrated in vacuo. The residue was subjected to column chromatography on neutral Al<sub>2</sub>O<sub>3</sub> to give (*E*)-methyl 3-(2-isocyanophenoxy)acrylate (**1a**, 2.60 g, 83%) as a white solid.<sup>2,3</sup>

## 2.2 General procedure for the preparation of substrates 6

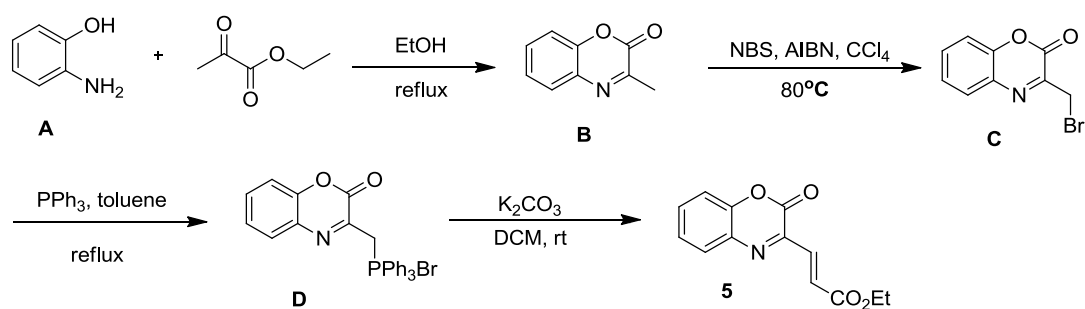

**Setp 1:** To a 250 mL round-bottomed flask equipped with a magnetic stir bar was added 100 ml absolute ethyl alcohol, active Molecular sieves type 4Å, **A** (2.40 g, 22.0 mmol, 1.1 eq) and ethyl pyruvate (2.32 g, 20.0 mmol, 1.0 eq), the reaction mixture was stirred at 110 °C for 12 h. After cooling to room temperature, the mixture was filtered and concentrated under vacuum, purified by flash silica gel column chromatography (petroleum ether : ethyl acetate = 5:1) to afford the desired product **B** as a yellow solid (2.58 g, 80% yield).<sup>4</sup>

**Setp 2:** To a 250 mL round-bottomed flask equipped with a magnetic stir bar was added **B** (2.58 g, 16.0 mmol, 1.0 eq), CCl<sub>4</sub> (100 mL), bromosuccinimide (2.85 g, 16.0 mmol, 1.0 eq) and AIBN ((0.50 g, 4.8 mmol)). The reaction mixture was stirred at 80 °C for 24 h. After cooling to room temperature, H<sub>2</sub>O (100 mL) and dichloromethane (50 mL) were added to the mixture, and the layers were separated. The aqueous layer was extracted with dichloromethane (2 x 50 mL). The combined organic layers were

washed with brine and dried over anhydrous  $\text{Na}_2\text{SO}_4$ . The solvent was removed under reduced pressure, and the residue was purified by silica gel column chromatography (petroleum ether: ethyl acetate = 5:1) to give 3-(bromomethyl)-2H-benzo[*b*] [1, 4] oxazin-2-one **C** as a yellow solid.

**Setp 3:** To a solution of above yellow solid was added toluene (60 mL) and triphenylphosphine (4.19 g, 16.0 mmol, 1.0eq). The reaction mixture was stirred at 110 °C for 12h. After cooling to room temperature, the precipitate was isolated by filtration, washed with pentane to afford **D** as a brown solid (4.02 g, 50% yield for two steps).

**Setp 4:** A mixture of **D** (0.53 g, 1.05 mmol), ethyl glyoxalate (1.0 mmol, 50% in toluene) and potassium carbonate (0.15 g, 1.05 mmol) in 10 mL DCM was stirred at room temperature for 0.5 h. The water (20 mL) was added to the reaction mixture, and extracted with dichloromethane (3 x 20 mL). The combined organic layers were dried over anhydrous  $\text{Na}_2\text{SO}_4$ , filtered, concentrated, and purified by column chromatography (petroleum ether: ethyl acetate = 10:1) to give the desired products **5** as a yellow solid (0.14 g, 57% yield).<sup>5</sup>

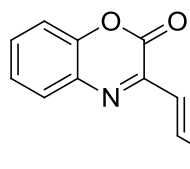

**5:** 142 mg, 57% yield, yellow solid: m.p. 85-87°C.  $^1\text{H}$  NMR (500 MHz,  $\text{CDCl}_3$ ):  $\delta$  (ppm) = 7.82 (d,  $J$  = 16.0 Hz, 1H), 7.79 (dd,  $J$  = 8.0, 1.5 Hz, 1H), 7.56-7.53 (m, 1H), 7.39 (td,  $J$  = 8.0, 1.5 Hz, 1H), 7.34-7.29 (m, 2H), 4.29 (q,  $J$  = 7.0 Hz, 2H), 1.34 (t,  $J$  = 7.0 Hz, 3H).  $^{13}\text{C}$  NMR (125 MHz,  $\text{CDCl}_3$ ):  $\delta$  (ppm) = 165.9, 152.3, 148.1, 146.5, 136.5, 132.6, 131.8, 130.1, 129.5, 126.1, 116.6, 61.3, 14.3. HRMS (ESI): calcd. for  $\text{C}_{13}\text{H}_{11}\text{NO}_4$   $[\text{M}+\text{H}]^+$ : 246.0761, found: 246.0780.

$^1\text{H}$  NMR (500 MHz,  $\text{CDCl}_3$ ) for **5**

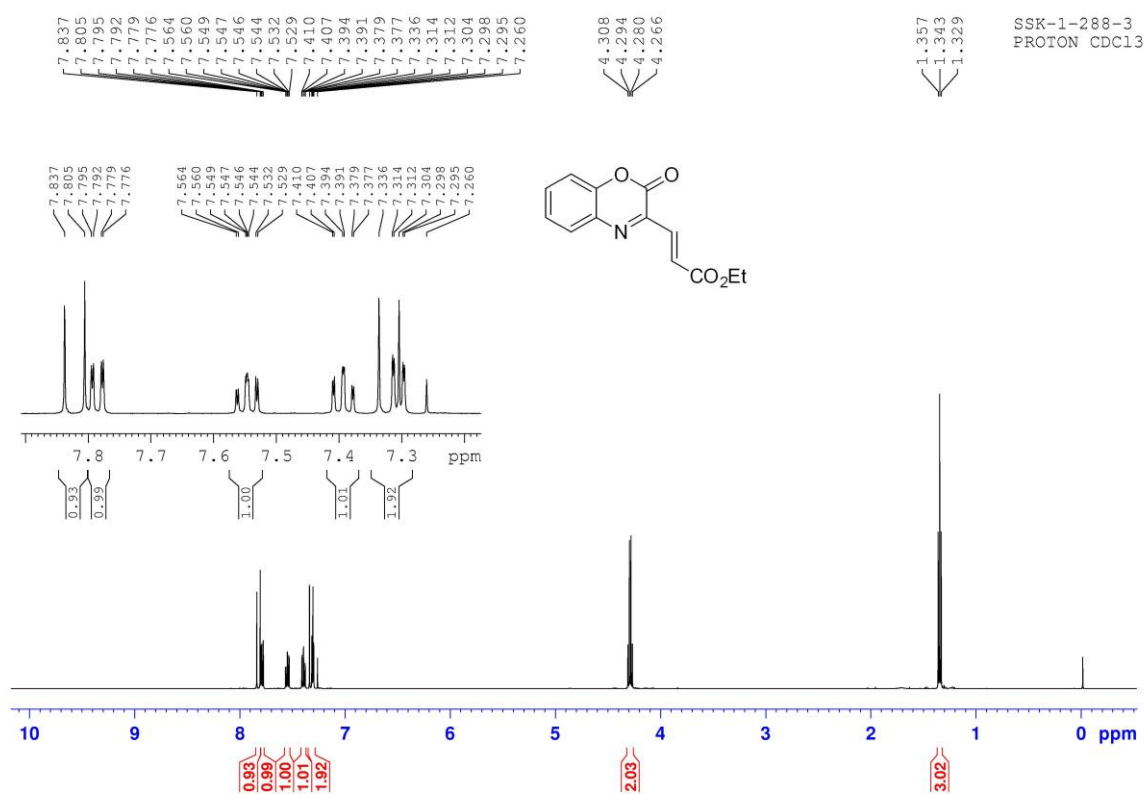

$^{13}\text{C}$  NMR (125 MHz,  $\text{CDCl}_3$ ) for **5**

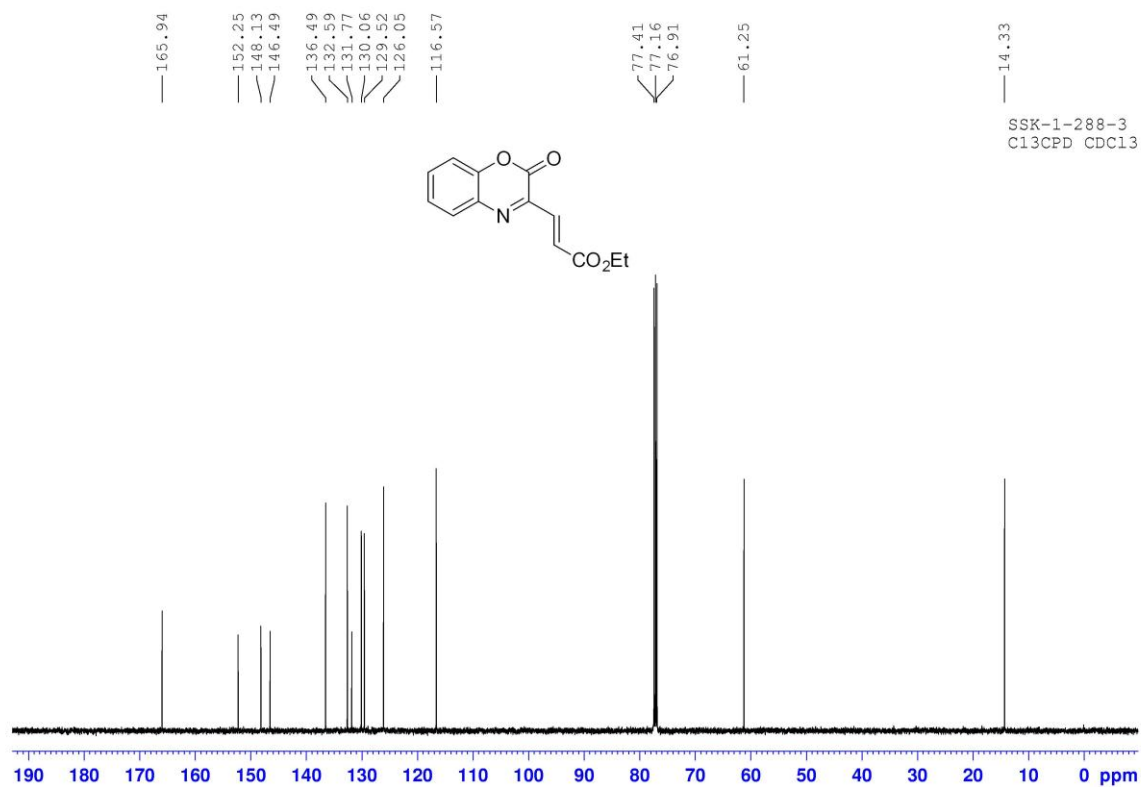

## 2.3 General Procedure for the Formation of Product 3 or 4.

Under air atmosphere, a flask equipped with a magnetic stir bar and reflux condenser was charged with 2-isocyanophenylacrylate **1** (0.3 mmol, 1.0 eq), isocyanide **2** (0.6 mmol, 2.0 eq) and H<sub>2</sub>O (0.6 mmol, 2.0 eq) in DMA (3.0 mL), the resulting solution was heated at 130 °C for 12 hours. After the completion of the reaction, H<sub>2</sub>O (20 mL) was added, extracted by EA (3×20 mL). The combined organic layer was dried over anhydrous Na<sub>2</sub>SO<sub>4</sub>, concentrated under reduced pressure to afford the crude product which was purified by flash silica gel column chromatography using a gradient of ethyl acetate: petroleum ether to afford the corresponding products **3 or 4**.

### References:

1. E. Ciganek, *Synthesis*, **1995**, 1311.
2. M. Tobisu, H. Fujihara, K. Koh, N. Chatani, *J. Org. Chem.* **2010**, 75, 4841.
3. Z. Hu, H. Yuan, Y. Men, Q. Liu, J. Zhang, X. Xu, *Angew. Chem. Int. Ed.* **2016**, 55, 7077.
4. Le Bris, M. T. *J. Heterocyclic. Chem.* **1985**, 22, 1275-1280.
5. Y.-Y. Ding, D.-F. Xu, S.-S. Meng, Y. Li, J.-L. Zhao, *Adv. Synth. Catal.* **2018**, 360, 664.

### 3. Optimization of Reaction Conditions

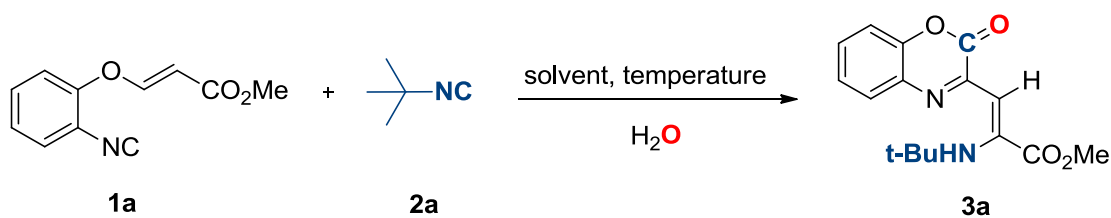

#### (1) Screening the solvent and temperature

| Entry             | Solvent     | Temp (°C) | Yield (%) <sup>[b]</sup> |
|-------------------|-------------|-----------|--------------------------|
| 1                 | Toluene     | 100       | 8                        |
| 2                 | 1,4-dioxane | 100       | 15                       |
| 3                 | DME         | 100       | 13                       |
| 4                 | Diglyme     | 100       | 6                        |
| 5                 | DMSO        | 100       | 0                        |
| 6                 | DMF         | 100       | 31                       |
| 7                 | DMA         | 100       | 42                       |
| 8                 | DMA         | 120       | 49                       |
| 9                 | DMA         | 130       | 71                       |
| 10                | DMA         | 140       | 59                       |
| 11                | DMA         | 80        | trace                    |
| 12 <sup>[c]</sup> | DMA         | 130       | 14                       |
| 13 <sup>[d]</sup> | DMA         | 130       | trace                    |

[a] All reactions were carried out with 0.3 mmol of 2-isocyanophenoxyacrylate **1a**, 0.6 mmol *tert*-butyl isocyanide **2a**, and 0.6 mmol H<sub>2</sub>O in 3 mL solvent. [b] Yields of product after silica gel chromatography. [c] Under N<sub>2</sub> atmosphere. [d] No extra H<sub>2</sub>O was added.

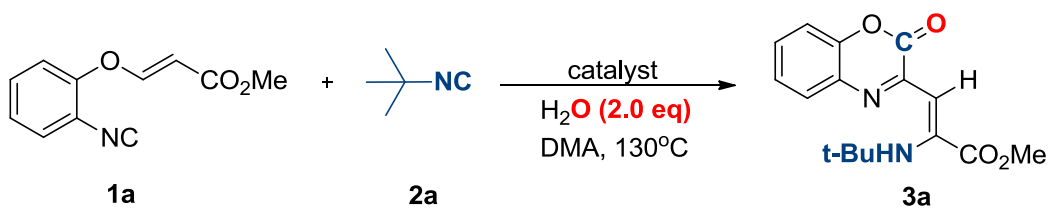

#### (2) Screening the catalyst

| Entry | catalyst             | eq  | Yield (%) |
|-------|----------------------|-----|-----------|
| 1     | Sc(OTf) <sub>3</sub> | 0.1 | -         |
| 2     | Cu(OTf) <sub>2</sub> | 0.1 | -         |
| 3     | Y(OTf) <sub>3</sub>  | 0.1 | trace     |

|    |                                  |     |       |
|----|----------------------------------|-----|-------|
| 4  | La(OTf) <sub>3</sub>             | 0.1 | -     |
| 5  | Yb(OTf) <sub>3</sub>             | 0.1 | -     |
| 6  | Bi(OTf) <sub>3</sub>             | 0.1 | -     |
| 7  | AgNO <sub>3</sub>                | 0.1 | trace |
| 8  | AgOAc                            | 0.1 | 12    |
| 9  | Ag <sub>2</sub> CO <sub>3</sub>  | 0.1 | 23    |
| 10 | Zn(OAc) <sub>2</sub>             | 0.1 | -     |
| 11 | H <sub>2</sub> O <sub>2</sub>    | 1.0 | trace |
| 12 | DDQ                              | 0.1 | -     |
| 13 | Pd(TFA) <sub>2</sub>             | 0.1 | 18    |
| 14 | InCl <sub>3</sub>                | 0.1 | trace |
| 15 | K <sub>2</sub> PtCl <sub>6</sub> | 0.1 | trace |
| 16 | Mn(acac) <sub>2</sub>            | 0.1 | trace |
| 17 | Ni(acac) <sub>2</sub>            | 0.1 | -     |
| 18 | HCOOH                            | 0.3 | 35    |
| 19 | AcOH                             | 0.3 | 41    |
| 20 | TsOH·H <sub>2</sub> O            | 0.3 | -     |

[a] All reactions were carried out with 0.3 mmol of 2-isocyanophenyoxyacrylate **1a**, 0.6 mmol *tert*-butyl isocyanide **2a**, and 0.6 mmol H<sub>2</sub>O in 3 mL DMA. [b] Yields of product after silica gel chromatography.

## 4 Control Experiments and Mechanistic Studies

### 4.1 Reactions with activated methylene isocyanides

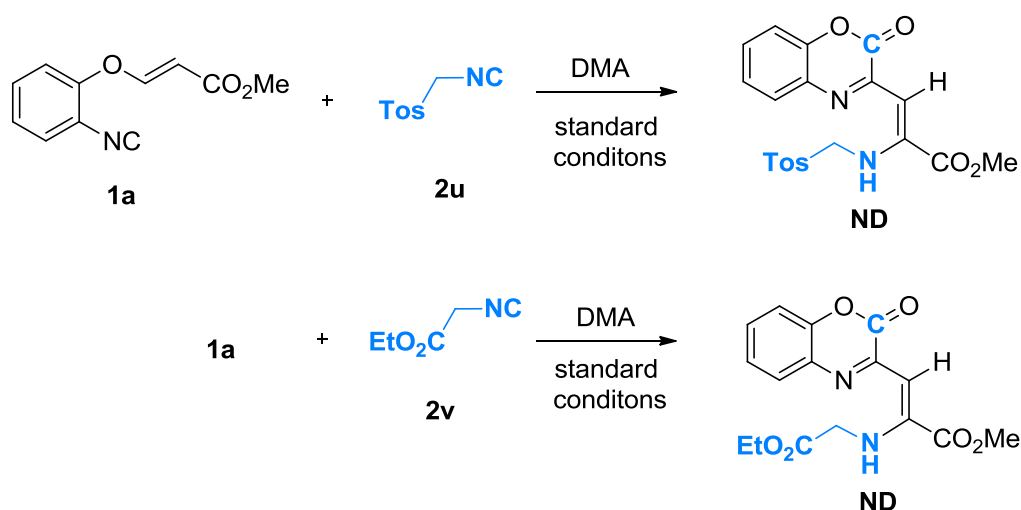

Under air atmosphere, a flask equipped with a magnetic stir bar and reflux condenser was charged with 2-isocyanophenyoxyacrylate **1a** (0.3 mmol, 1.0 eq), isocyanide **2u** (**2v**) (0.6 mmol, 2.0 eq) and H<sub>2</sub>O (0.6 mmol, 2.0 eq) in DMA (3.0 mL), the resulting solution was heated at 130 °C for 12 hours. After the





which was purified by flash silica gel column chromatography using a gradient of ethyl acetate: petroleum ether to afford the corresponding products [ $^{18}\text{O}$ ]-**3a** (62 mg, 68% yield).

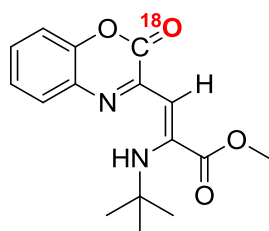

([ $^{18}\text{O}$ ]-**3a**): 62 mg, 68% yield, yellow solid: m.p. 143-145 °C.  $^1\text{H}$  NMR (500 MHz,  $\text{CDCl}_3$ ):  $\delta$  (ppm) = 10.99 (brs, 1H), 7.43-7.40 (m, 1H), 7.27-7.21 (m, 2H), 7.20-7.17 (m, 1H), 6.05 (s, 1H), 3.89 (s, 3H), 1.47 (s, 9H).  $^{13}\text{C}$  NMR (125 MHz,  $\text{CDCl}_3$ ):  $\delta$  (ppm) = 165.5, 154.24, 154.21, 150.5, 150.0, 144.9, 131.9, 127.4, 125.9, 125.4,

116.5, 91.2, 54.5, 52.9, 30.7. HRMS (ESI): calcd. for  $\text{C}_{16}\text{H}_{19}\text{N}_2\text{O}_3^{18}\text{O}$   $[\text{M}+\text{H}]^+$  305.1387, Found: 305.1392.

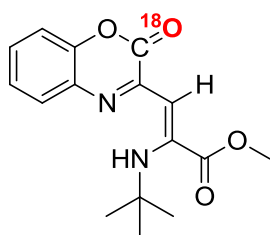

[ $^{18}\text{O}$ ]-**3a**

Chemical Formula:  $\text{C}_{16}\text{H}_{18}\text{N}_2\text{O}_3^{18}\text{O}$

$[\text{M}+\text{H}]^+$

Calcd: 305.1387

Found: 305.1392

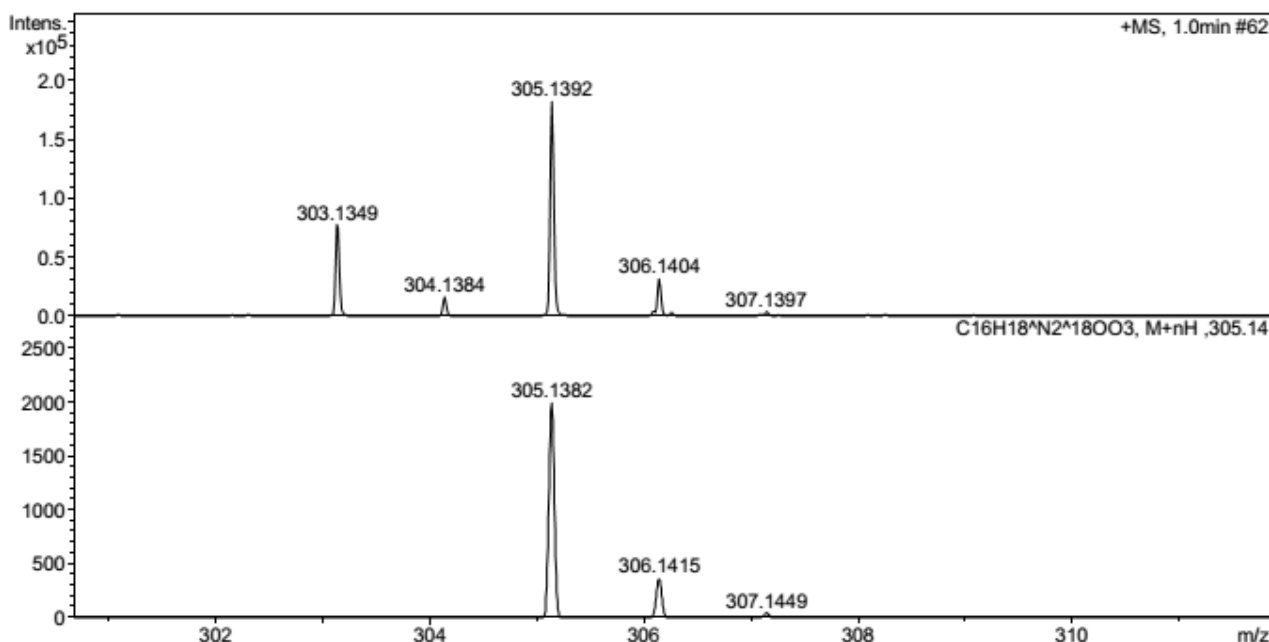

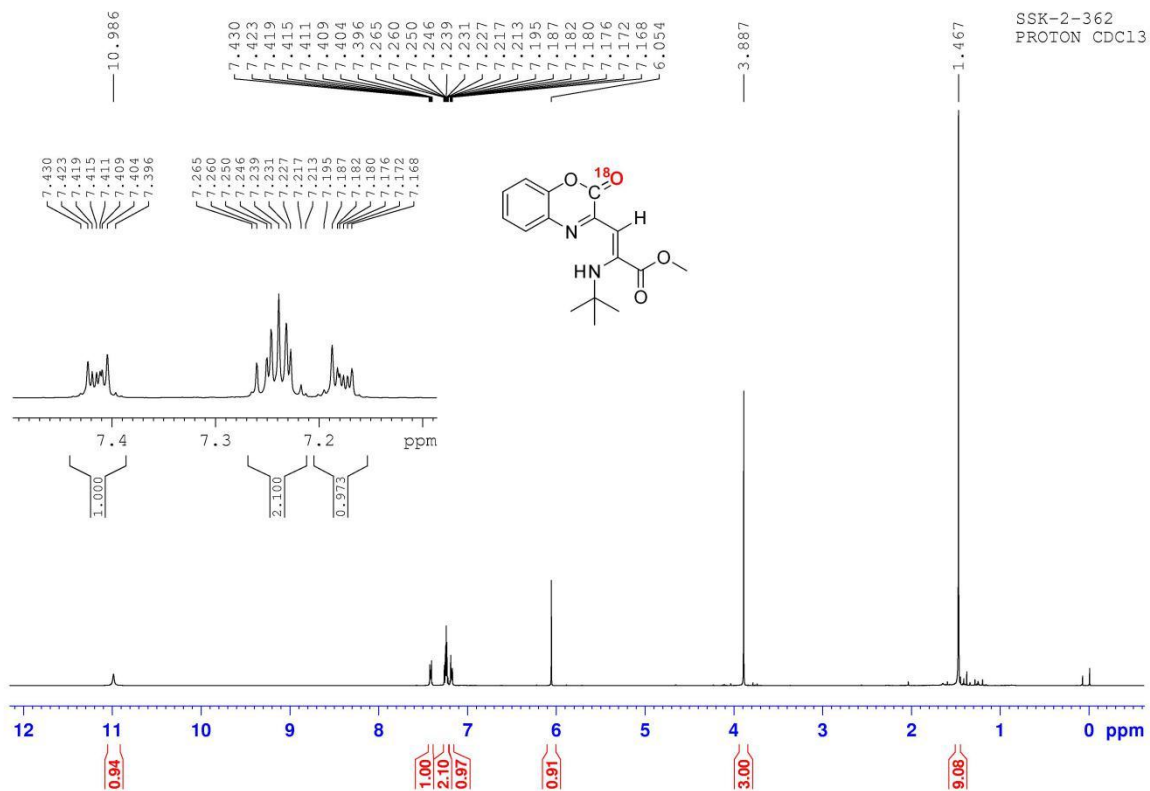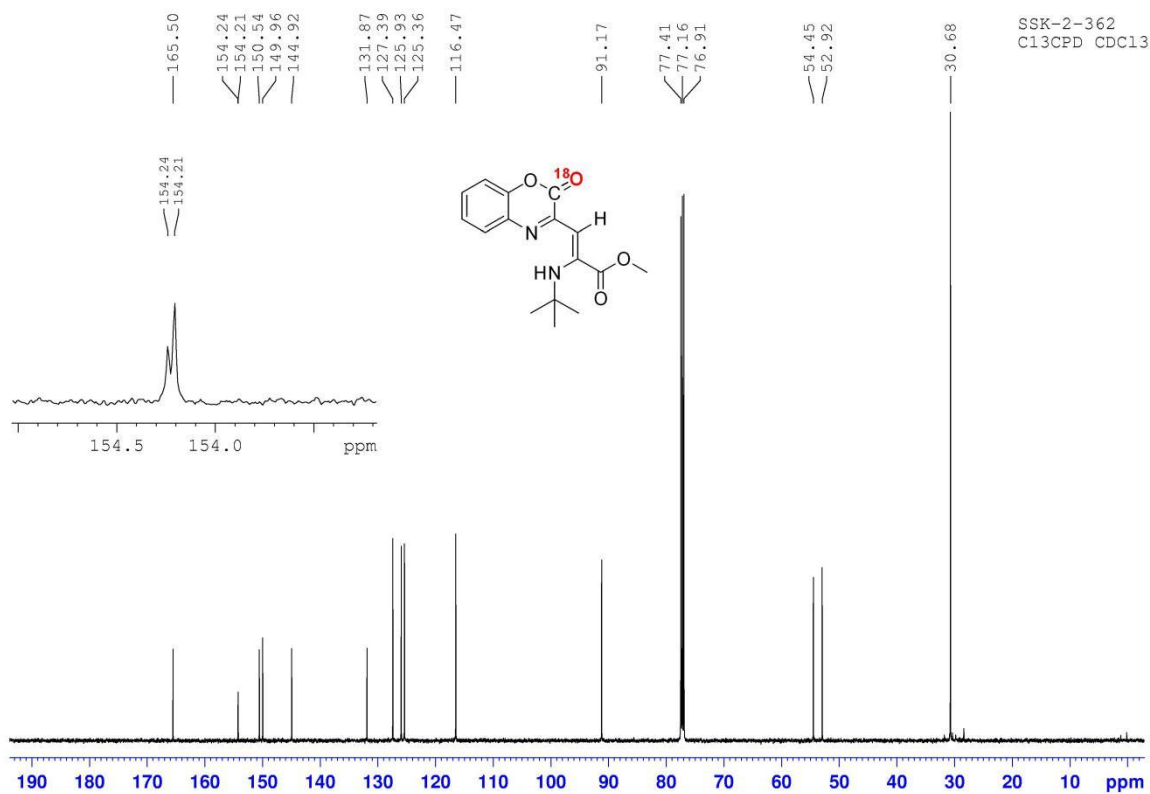

#### 4.4 Isotope reaction to find out the real hydrogen source

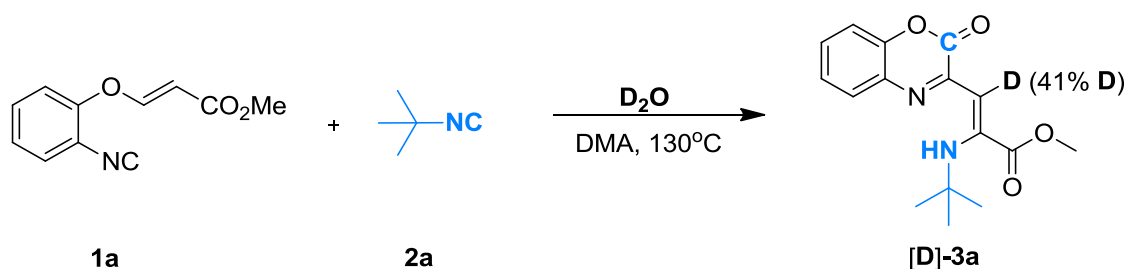

Under air atmosphere, sealed tube with a magnetic stir bar was charged with 2-isocyanophenyloxyacrylate **1a** (0.3 mmol, 1.0 eq), isocyanide **2a** (0.6 mmol, 2.0 eq) and  $D_2O$  (0.6 mmol, 2.0 eq) in DMA (1.5 mL), the resulting solution was heated at 130 °C for 12 hours. After the completion of the reaction,  $H_2O$  (20 mL) was added, exterted by EA (3×20 mL). The combined organic layer was dried over anhydrous  $Na_2SO_4$ , concentrated under reduced pressure to afford the crude product which was purified by flash silica gel column chromatography using a gradient of ethyl acetate: petroleum ether to afford the corresponding products [D]-**3a** (64 mg, 70% yield).

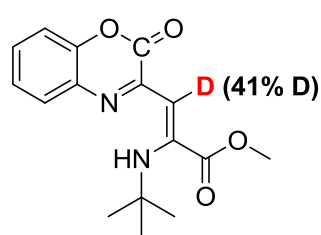

([D]-**3a**): 64 mg, 70% yield, yellow solid: m.p. 144-146°C.  $^1H$  NMR (500 MHz,  $CDCl_3$ ):  $\delta$  (ppm) = 11.00 (brs, 1H), 7.44-7.41 (m, 1H), 7.27-7.23 (m, 2H), 7.21-7.18 (m, 1H), 6.06 (s, 0.59H), 3.89 (s, 3H), 1.47 (s, 9H).  $^{13}C$  NMR (125 MHz,  $CDCl_3$ ):  $\delta$  (ppm) = 165.5, 154.2, 150.53, 150.48, 149.95, 149.87,

131.9, 127.4, 125.9, 125.4, 116.5, 91.2, 54.4, 52.9, 30.7. HRMS (ESI): calcd. for  $C_{16}H_{18}DN_2O_4$   $[M+H]^+$  304.1408, Found: 304.1393.

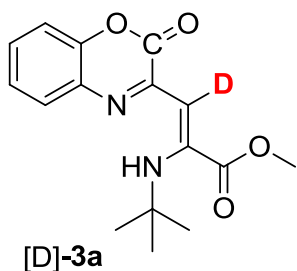

Chemical Formula:  $C_{16}H_{17}DN_2O_4$   
 $[M+H]^+$   
 Calcd: 304.1408  
 Found: 304.1393

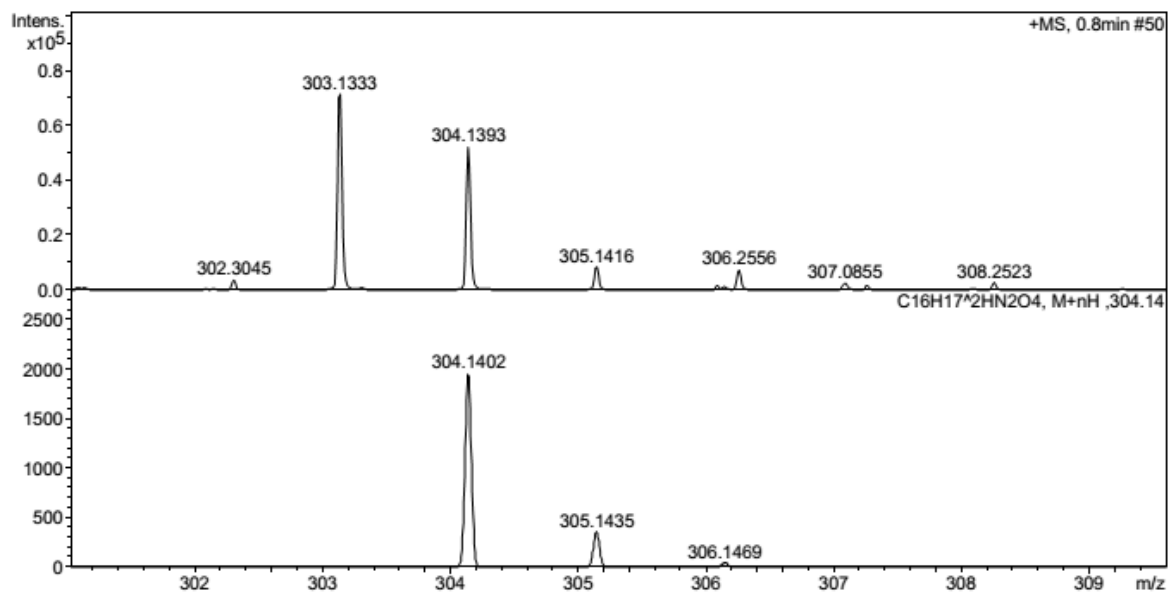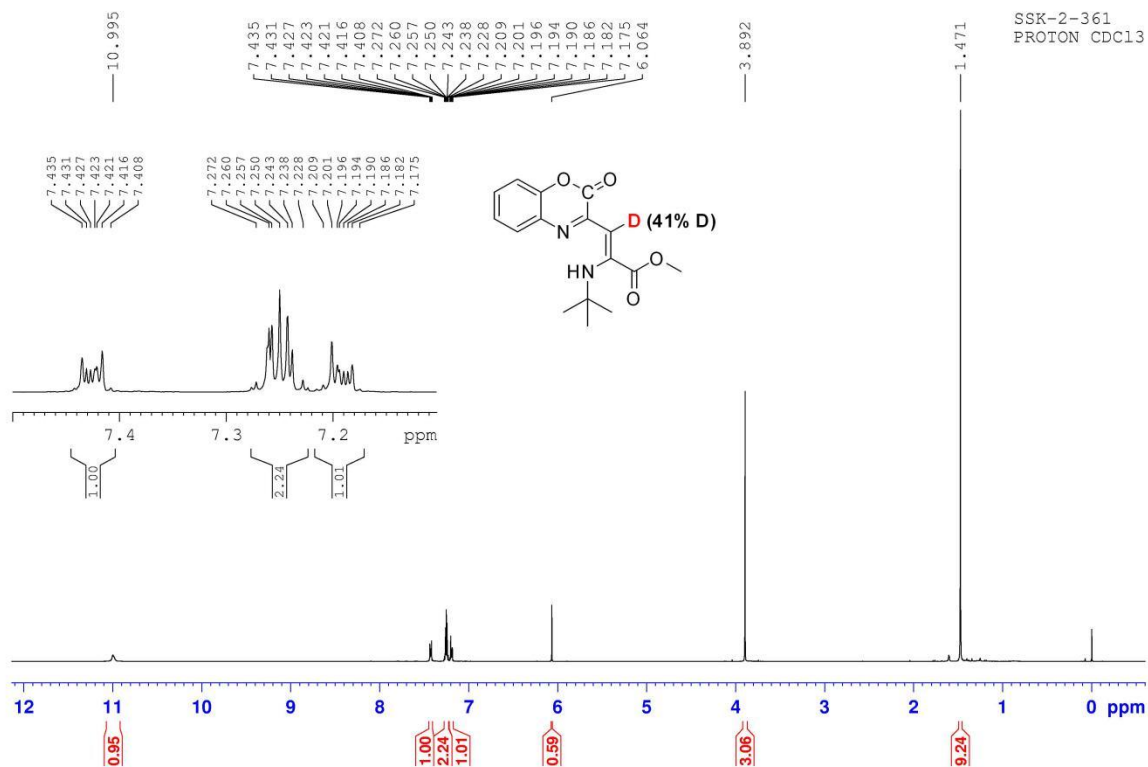

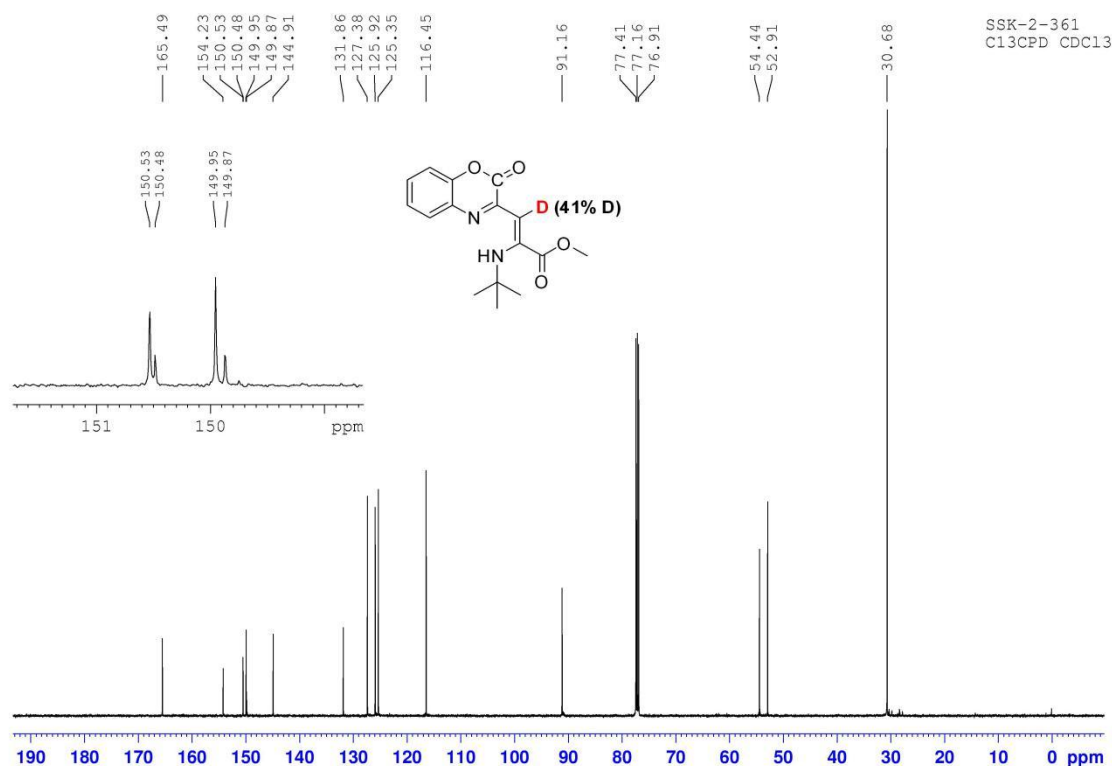

## 4.5 Reaction with radical radical scavenger TEMPO

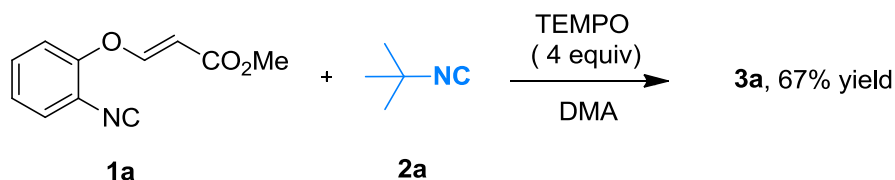

Under air atmosphere, sealed tube with a magnetic stir bar was charged with 2-isocyanophenylacrylate **1a** (0.3 mmol, 1.0 eq), isocyanide **2a** (0.6 mmol, 2.0 eq), TEMPO (4.0 equiv.), and H<sub>2</sub>O (0.6 mmol, 2.0 eq) in DMA (1.5 mL), the resulting solution was heated at 130 °C for 12 hours. After the completion of the reaction, H<sub>2</sub>O (20 mL) was added, extracted by EA (3×20 mL). The combined organic layer was dried over anhydrous Na<sub>2</sub>SO<sub>4</sub>, concentrated under reduced pressure to afford the crude product which was purified by flash silica gel column chromatography using a gradient of ethyl acetate: petroleum ether to afford the corresponding product **3a**.

## 4.6 Reaction under the inert atmosphere

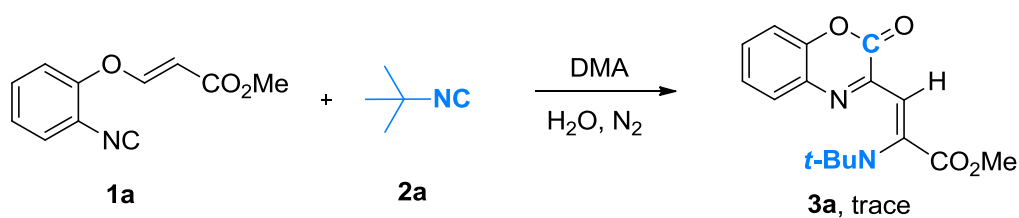

A sealed Schlenk tube was charged with 2-isocyanophenyl 2-methoxyacrylate **1a** (0.3 mmol, 1.0 eq), isocyanide **2a** (0.6 mmol, 2.0 eq) and H<sub>2</sub>O (0.6 mmol, 2.0 eq) in DMA (1.5 mL), the vial was charged with nitrogen and was heated at 130 °C for 12 hours. The progress of the reaction was monitored by TLC. After the completion of the reaction, H<sub>2</sub>O (20 mL) was added, extracted by EA (3×20 mL). The combined organic layer was dried over anhydrous Na<sub>2</sub>SO<sub>4</sub>, concentrated under reduced pressure to afford the crude product which was purified by flash silica gel column chromatography using a gradient of ethyl acetate: petroleum ether to afford the corresponding products.

## 5 Characterization Data

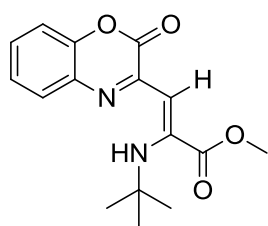

**(3a)**: 66 mg, 73% yield, yellow solid: m.p. 137-139 °C.  $^1\text{H}$  NMR (500 MHz,  $\text{CDCl}_3$ ):  $\delta$  (ppm) = 10.99 (brs, 1H), 7.42-7.40 (m, 1H), 7.25-7.22 (m, 2H), 7.19-7.17 (m, 1H), 6.05 (s, 1H), 3.89 (s, 3H), 1.47 (s, 9H).  $^{13}\text{C}$  NMR (125 MHz,  $\text{CDCl}_3$ ):  $\delta$  (ppm) = 165.5, 154.2, 150.5, 150.0, 144.9, 131.9, 127.4, 125.9, 125.4, 116.5, 91.2, 54.5, 52.9, 30.7. HRMS (ESI): calcd. for  $\text{C}_{16}\text{H}_{19}\text{N}_2\text{O}_4$   $[\text{M}+\text{H}]^+$  303.1345, Found: 303.1341.

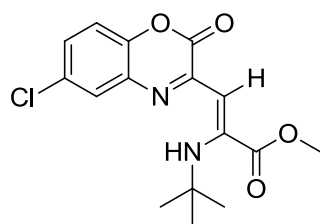

**(3b)**: 63 mg, 62% yield, yellow solid: m.p. 140-141 °C.  $^1\text{H}$  NMR (500 MHz,  $\text{CDCl}_3$ ):  $\delta$  (ppm) = 11.03 (brs, 1H), 7.35 (d,  $J$  = 2.5 Hz, 1H), 7.18 (dd,  $J$  = 9.0, 2.5 Hz, 1H), 7.11 (d,  $J$  = 9.0 Hz, 1H), 6.02 (s, 1H), 3.90 (s, 3H), 1.48 (s, 9H).  $^{13}\text{C}$  NMR (125 MHz,  $\text{CDCl}_3$ ):  $\delta$  (ppm) = 165.2, 153.8, 151.0, 151.0, 143.5, 132.7, 130.3, 126.8, 125.2, 117.5, 90.9, 54.8, 53.1, 30.6. HRMS (ESI): calcd. for  $\text{C}_{16}\text{H}_{18}\text{ClN}_2\text{O}_4$   $[\text{M}+\text{H}]^+$  337.0955, Found: 337.0951.

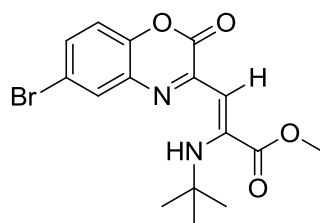

**(3c)**: 73 mg, 64% yield, yellow solid: m.p. 139-140 °C.  $^1\text{H}$  NMR (500 MHz,  $\text{CDCl}_3$ ):  $\delta$  (ppm) = 11.02 (brs, 1H), 7.50 (d,  $J$  = 2.5 Hz, 1H), 7.32 (dd,  $J$  = 9.0, 2.5 Hz, 1H), 7.05 (d,  $J$  = 8.5 Hz, 1H), 6.02 (s, 1H), 3.90 (s, 3H), 1.48 (s, 9H).  $^{13}\text{C}$  NMR (125 MHz,  $\text{CDCl}_3$ ):  $\delta$  (ppm) = 165.2, 153.8, 151.0, 151.0, 144.0, 133.1, 129.7, 128.2, 117.9, 117.7, 90.9, 54.8, 53.1, 30.7. HRMS (ESI): calcd. for  $\text{C}_{16}\text{H}_{18}\text{BrN}_2\text{O}_4$   $[\text{M}+\text{H}]^+$  381.0450, Found: 381.0439.

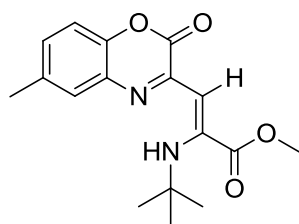

**(3d)**: 68 mg, 72% yield, yellow solid: m.p. 150-151 °C.  $^1\text{H}$  NMR (500 MHz,  $\text{CDCl}_3$ ):  $\delta$  (ppm) = 10.93 (brs, 1H), 7.20 (s, 1H), 7.08-7.04 (m, 2H), 6.06 (s, 1H), 3.89 (s, 3H), 2.39 (s, 3H), 1.47 (s, 9H).  $^{13}\text{C}$  NMR (125 MHz,  $\text{CDCl}_3$ ):  $\delta$  (ppm) = 165.6, 154.5, 150.5, 149.8, 142.9, 135.2, 131.6, 128.4, 125.9, 116.1, 91.4, 54.4, 52.9, 30.8, 21.0. HRMS (ESI): calcd. for  $\text{C}_{17}\text{H}_{21}\text{N}_2\text{O}_4$   $[\text{M}+\text{H}]^+$  317.1501, Found: 317.1502.



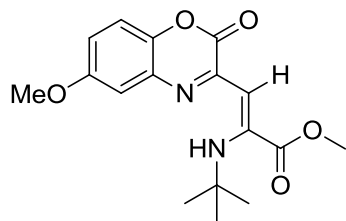

**(3e)**: 66 mg, 66% yield, yellow solid: m.p. 161-162 °C.  $^1\text{H}$  NMR (500 MHz,  $\text{CDCl}_3$ ):  $\delta$  (ppm) = 10.98 (brs, 1H), 7.12 (d,  $J$  = 8.5 Hz, 1H), 6.89 (d,  $J$  = 2.5 Hz, 2H), 6.84 (dd,  $J$  = 9.0, 3.0 Hz, 1H), 6.07 (s, 3H), 3.89 (s, 3H), 3.85 (s, 3H), 1.47 (s, 9H).  $^{13}\text{C}$  NMR (125 MHz,  $\text{CDCl}_3$ ):  $\delta$  (ppm) = 165.6, 154.5, 150.5, 149.8, 142.9, 135.2, 131.6, 128.4, 125.9, 116.1, 91.4, 54.4, 52.9, 30.8, 21.0. HRMS (ESI): calcd. for  $\text{C}_{17}\text{H}_{21}\text{N}_2\text{O}_5$   $[\text{M}+\text{H}]^+$  333.1450, Found: 333.1444.

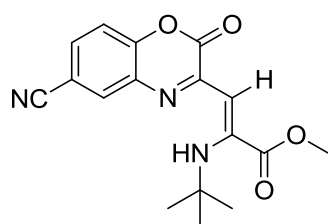

**(3f)**: 52 mg, 53% yield, yellow solid: m.p. 181-183 °C.  $^1\text{H}$  NMR (500 MHz,  $\text{CDCl}_3$ ):  $\delta$  (ppm) = 11.18 (brs, 1H), 7.68 (d,  $J$  = 1.5 Hz, 1H), 7.49 (dd,  $J$  = 8.5, 2.0 Hz, 1H), 7.27 (d,  $J$  = 3.0 Hz, 1H), 6.03 (s, 1H), 3.93 (s, 3H), 1.50 (s, 9H).  $^{13}\text{C}$  NMR (125 MHz,  $\text{CDCl}_3$ ):  $\delta$  (ppm) = 164.9, 153.1, 151.9, 151.3, 147.7, 132.5, 129.8, 129.7, 118.2, 117.8, 109.3, 90.6, 55.2, 53.2, 30.6. HRMS (ESI): calcd. for  $\text{C}_{17}\text{H}_{18}\text{N}_3\text{O}_4$   $[\text{M}+\text{H}]^+$  328.1297, Found: 328.1294.

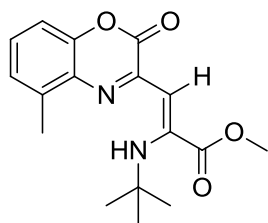

**(3g)**: 57 mg, 60% yield, yellow solid: m.p. 161-162 °C.  $^1\text{H}$  NMR (500 MHz,  $\text{CDCl}_3$ ):  $\delta$  (ppm) = 10.10 (brs, 1H), 7.16 (t,  $J$  = 8.5 Hz, 1H), 7.12 (d,  $J$  = 7.0 Hz, 1H), 7.04 (dd,  $J$  = 8.0, 1.5 Hz, 1H), 6.07 (s, 1H), 3.90 (s, 3H), 2.52 (s, 3H), 1.47 (s, 9H).  $^{13}\text{C}$  NMR (125 MHz,  $\text{CDCl}_3$ ):  $\delta$  (ppm) = 165.9, 154.4, 149.7, 149.6, 145.1, 134.6, 130.7, 127.1, 126.5, 114.4, 91.6, 54.3, 53.0, 31.2, 18.7. HRMS (ESI): calcd. for  $\text{C}_{17}\text{H}_{21}\text{N}_2\text{O}_4$   $[\text{M}+\text{H}]^+$  317.1501, Found: 317.1498.

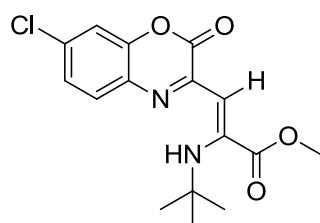

**(3h)**: 72 mg, 71% yield, yellow solid: m.p. 157-158 °C.  $^1\text{H}$  NMR (500 MHz,  $\text{CDCl}_3$ ):  $\delta$  (ppm) = 10.94 (brs, 1H), 7.31 (d,  $J$  = 8.0 Hz, 1H), 7.20-7.17 (m, 2H), 6.01 (s, 1H), 3.89 (s, 3H), 1.46 (s, 9H).  $^{13}\text{C}$  NMR (125 MHz,  $\text{CDCl}_3$ ):  $\delta$  (ppm) = 165.3, 153.6, 150.4, 150.2, 145.1, 132.3, 130.6, 126.5, 125.7, 116.7, 91.0, 54.6, 53.0, 30.6. HRMS (ESI): calcd. for  $\text{C}_{16}\text{H}_{18}\text{ClN}_2\text{O}_4$   $[\text{M}+\text{H}]^+$  337.0955, Found: 337.0948.

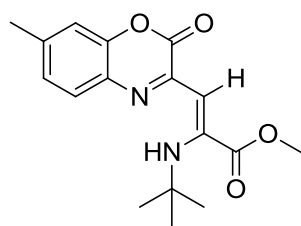

**(3i)**: 71 mg, 75% yield, yellow solid: m.p. 120-121 °C. <sup>1</sup>H NMR (500 MHz, CDCl<sub>3</sub>): δ (ppm) = 10.81 (brs, 1H), 7.29 (d, *J* = 8.0 Hz, 1H), 7.03 (dd, *J* = 8.0, 1.0 Hz, 1H), 6.97 (s, 1H), 6.04 (s, 1H), 3.88 (s, 3H), 1.45 (s, 9H). <sup>13</sup>C NMR (125 MHz, CDCl<sub>3</sub>): δ (ppm) = 165.6, 154.4, 149.7, 149.3, 144.8, 138.4, 129.7, 126.4, 125.6, 116.6, 91.4, 54.3, 52.9, 30.7, 21.5. HRMS (ESI): calcd. for C<sub>17</sub>H<sub>21</sub>N<sub>2</sub>O<sub>4</sub> [M+H]<sup>+</sup> 317.1501, Found: 317.1507.

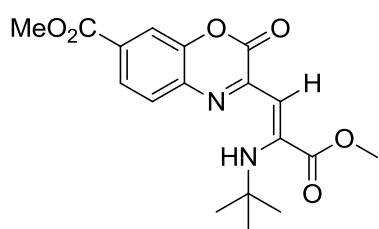

**(3j)**: 53 mg, 43% yield, yellow solid: m.p. 160-161 °C. <sup>1</sup>H NMR (500 MHz, CDCl<sub>3</sub>): δ (ppm) = 11.30 (brs, 1H), 7.86 (dd, *J* = 8.0, 1.5 Hz, 1H), 7.78 (d, *J* = 1.5 Hz, 1H), 7.37 (d, *J* = 8.5 Hz, 1H), 6.02 (s, 1H), 3.91 (s, 3H), 3.89 (s, 3H), 1.47 (s, 9H). <sup>13</sup>C NMR (125 MHz, CDCl<sub>3</sub>): δ (ppm) = 165.9, 165.0, 153.9, 151.6, 151.5, 144.3, 135.4, 128.1, 126.5, 125.3, 117.8, 91.1, 54.9, 53.1, 52.5, 30.5. HRMS (ESI): calcd. for C<sub>18</sub>H<sub>21</sub>N<sub>2</sub>O<sub>6</sub> [M+H]<sup>+</sup> 361.1400, Found: 361.1398.

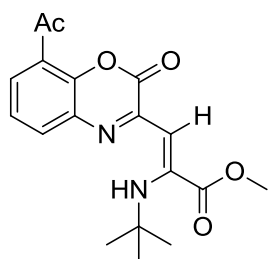

**(3k)**: 39 mg, 38% yield, yellow solid: m.p. 145-147 °C. <sup>1</sup>H NMR (500 MHz, CDCl<sub>3</sub>): δ (ppm) = 11.04 (brs, 1H), 7.71 (dd, *J* = 8.0, 2.0 Hz, 1H), 7.56 (dd, *J* = 8.0, 1.5 Hz, 1H), 7.28 (t, *J* = 7.5 Hz, 1H), 6.04 (s, 1H), 3.91 (s, 3H), 2.79 (s, 3H), 1.48 (s, 9H). <sup>13</sup>C NMR (125 MHz, CDCl<sub>3</sub>): δ (ppm) = 197.0, 165.3, 152.9, 150.7, 150.3, 143.8, 132.2, 130.0, 128.0, 127.3, 125.0, 90.8, 54.7, 53.1, 32.2, 30.7. HRMS (ESI): calcd. for C<sub>18</sub>H<sub>21</sub>N<sub>2</sub>O<sub>5</sub> [M+H]<sup>+</sup> 345.1450, Found: 345.1451.

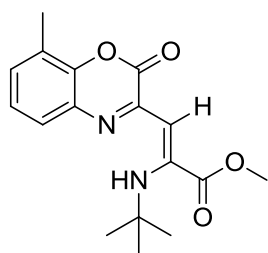

**(3l)**: 62 mg, 65% yield, yellow solid: m.p. 180-182 °C. <sup>1</sup>H NMR (500 MHz, CDCl<sub>3</sub>): δ (ppm) = 11.04 (brs, 1H), 7.26 (dd, *J* = 8.0, 1.5 Hz, 1H), 7.13 (t, *J* = 7.5 Hz, 1H), 7.10-7.09 (m, 1H), 6.07 (s, 1H), 3.89 (s, 3H), 2.38 (s, 3H), 1.46 (s, 9H). <sup>13</sup>C NMR (125 MHz, CDCl<sub>3</sub>): δ (ppm) = 165.6, 154.4, 150.24, 149.7, 143.3, 131.6, 129.0, 125.9, 124.8, 123.7, 91.3, 54.4, 52.9, 30.7, 14.9. HRMS (ESI):

calcd. for  $C_{17}H_{21}N_2O_4$   $[M+H]^+$  317.1501, Found: 317.1498.

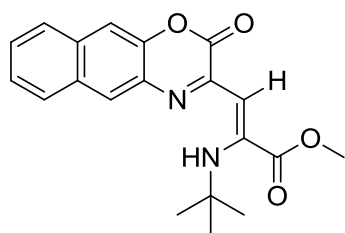

(**3m**): 71 mg, 67% yield, yellow solid: m.p. 189-191 °C.  $^1H$  NMR (500 MHz,  $CDCl_3$ ):  $\delta$  (ppm) = 11.14 (brs, 1H), 7.85 (dd,  $J$  = 7.0, 2.0 Hz, 1H), 7.80 (s, 1H), 7.79 (d,  $J$  = 7.0 Hz, 1H), 7.53 (s, 1H), 7.48-7.42 (m, 2H), 6.09 (s, 1H), 3.91 (s, 3H), 1.53 (s, 9H).  $^{13}C$  NMR (125 MHz,  $CDCl_3$ ):  $\delta$  (ppm) = 165.5, 154.2, 150.4, 150.1, 143.7, 132.1, 131.3, 128.0, 127.5, 126.8, 125.9, 123.7, 112.6, 91.5, 54.6, 53.0, 30.7. HRMS (ESI): calcd. for  $C_{20}H_{21}N_2O_4$   $[M+H]^+$  353.1501, Found: 353.1498.

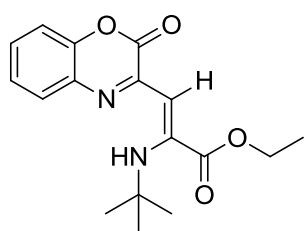

(**3n**): 73 mg, 77% yield, yellow solid: m.p. 97-99 °C.  $^1H$  NMR (500 MHz,  $CDCl_3$ ):  $\delta$  (ppm) = 11.04 (brs, 1H), 7.43-7.42 (m, 1H), 7.27-7.23 (m, 2H), 7.21-7.18 (m, 1H), 6.05 (s, 1H), 4.35 (q,  $J$  = 7.0 Hz, 2H), 1.48 (s, 9H), 1.40 (t,  $J$  = 7.0 Hz, 3H).  $^{13}C$  NMR (125 MHz,  $CDCl_3$ ):  $\delta$  (ppm) = 165.1, 154.3, 150.6, 144.9, 131.9, 127.3, 125.9, 125.3, 116.5, 90.9, 62.3, 54.5, 30.7, 14.1. HRMS (ESI): calcd. for  $C_{17}H_{21}N_2O_4$   $[M+H]^+$  317.1501, Found: 317.1499.

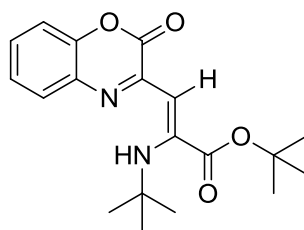

(**3o**): 66 mg, 64% yield, yellow solid: m.p. 165-166 °C.  $^1H$  NMR (500 MHz,  $CDCl_3$ ):  $\delta$  (ppm) = 11.15 (brs, 1H), 7.42-7.38 (m, 1H), 7.24-7.21 (m, 2H), 7.19-7.16 (m, 1H), 5.94 (s, 1H), 1.59 (s, 9H), 1.50 (s, 9H).  $^{13}C$  NMR (125 MHz,  $CDCl_3$ ):  $\delta$  (ppm) = 164.3, 154.4, 152.2, 150.6, 144.8, 132.0, 127.0, 125.7, 125.3, 116.4, 90.2, 83.9, 54.5, 30.8, 28.0. HRMS (ESI): calcd. for  $C_{19}H_{25}N_2O_4$   $[M+H]^+$  345.1814, Found: 345.1804.

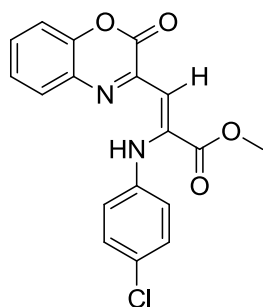

(**4a**): 69 mg, 65% yield, yellow solid: m.p. 152-154 °C.  $^1H$  NMR (500 MHz,  $CDCl_3$ ):  $\delta$  (ppm) = 11.79 (brs, 1H), 7.56 (dd,  $J$  = 8.0, 1.5 Hz, 1H), 7.37 (td,  $J$  = 7.5, 1.5 Hz, 1H), 7.32-7.28 (m, 3H), 7.25 (dd,  $J$  = 8.5, 1.5 Hz, 1H), 6.95-6.92 (m, 2H), 6.68 (s, 1H), 3.80 (s, 3H).  $^{13}C$  NMR (125 MHz,  $CDCl_3$ ):  $\delta$  (ppm) = 164.3, 153.7,

150.4, 145.4, 144.2, 138.9, 131.2, 130.3, 129.5, 129.4, 127.0, 125.7, 122.5, 116.8, 97.8, 53.06. HRMS (ESI): calcd. for C<sub>18</sub>H<sub>14</sub>ClN<sub>2</sub>O<sub>4</sub> [M+H]<sup>+</sup> 357.0642, Found: 357.0640.

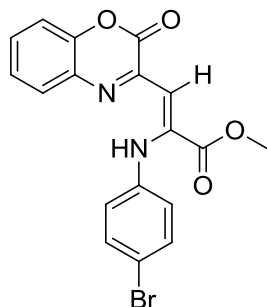

**(4b)**: 82 mg, 68% yield, yellow solid: m.p. 159-160 °C. <sup>1</sup>H NMR (500 MHz, CDCl<sub>3</sub>): δ (ppm) = 11.76 (brs, 1H), 7.56 (dd, *J* = 7.5, 1.5 Hz, 1H), 7.46-7.43 (m, 2H), 7.38 (td, *J* = 7.5, 1.5 Hz, 1H), 7.30 (td, *J* = 8.0, 1.5 Hz, 1H), 7.25 (d, *J* = 3.0, 1.0 Hz, 1H), 6.89-6.86 (m, 2H), 6.68 (s, 1H), 3.80 (s, 3H). <sup>13</sup>C NMR (125 MHz, CDCl<sub>3</sub>): δ (ppm) = 164.2, 153.7, 150.4, 145.4, 144.0, 139.4, 132.4, 131.2, 129.4,

127.0, 125.7, 122.7, 117.8, 116.8, 98.0, 53.1. HRMS (ESI): calcd. for C<sub>18</sub>H<sub>14</sub>BrN<sub>2</sub>O<sub>4</sub> [M+H]<sup>+</sup> 401.0137, Found: 401.0125.

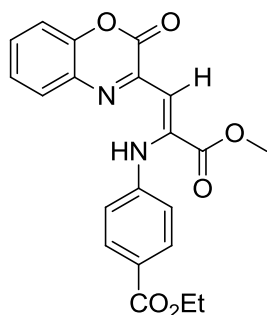

**(4c)**: 63 mg, 53% yield, yellow solid: m.p. 195-197 °C. <sup>1</sup>H NMR (500 MHz, CDCl<sub>3</sub>): δ (ppm) = 11.80 (brs, 1H), 8.02 (d, *J* = 9.0 Hz, 2H), 7.59 (dd, *J* = 8.0, 1.0 Hz, 1H), 7.42-7.38 (m, 1H), 7.34-7.31 (m, 1H), 7.26 (d, *J* = 8.0 Hz, 1H), 6.98 (d, *J* = 8.5 Hz, 2H), 6.75 (s, 1H), 4.37 (q, *J* = 7.0 Hz, 2H), 3.82 (s, 1H), 1.39 (t, *J* = 7.0 Hz, 1H). <sup>13</sup>C NMR (125 MHz, CDCl<sub>3</sub>): δ (ppm) = 166.1, 164.3, 153.5, 150.4,

145.5, 144.2, 143.2, 131.1, 131.0, 129.8, 127.2, 126.1, 125.8, 119.8, 116.8, 99.4, 61.1, 53.1, 14.5. HRMS (ESI): calcd. for C<sub>21</sub>H<sub>19</sub>N<sub>2</sub>O<sub>6</sub> [M+H]<sup>+</sup> 395.1243, Found: 395.1256

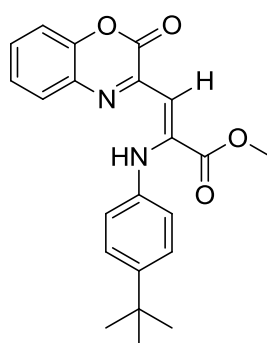

**(4d)**: 58mg, 51% yield, yellow solid: m.p. 58-59 °C. <sup>1</sup>H NMR (500 MHz, CDCl<sub>3</sub>): δ (ppm) = 11.93 (brs, 1H), 7.54 (dd, *J* = 8.0, 1.5 Hz, 1H), 7.38-7.32 (m, 3H), 7.28 (td, *J* = 7.5, 1.5 Hz, 1H), 7.24 (dd, *J* = 8.0, 1.5 Hz, 1H), 6.98-6.95 (m, 2H), 6.60 (s, 1H), 3.80 (s, 3H), 1.33 (m, 9H). <sup>13</sup>C NMR (125 MHz, CDCl<sub>3</sub>): δ (ppm) = 164.6, 153.9, 150.5, 148.1, 145.3, 145.0, 137.5, 131.5, 128.9, 126.8, 126.3, 125.6, 120.9,

116.7, 96.4, 53.0, 34.6, 31.5. HRMS (ESI): calcd. for C<sub>22</sub>H<sub>23</sub>N<sub>2</sub>O<sub>4</sub> [M+H]<sup>+</sup> 379.1658, Found: 379.1664.

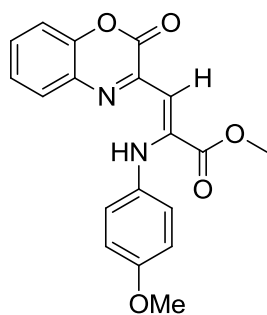

(**4e**): 80 mg, 76% yield, yellow solid: m.p. 145-146 °C.  $^1\text{H}$  NMR (500 MHz,  $\text{CDCl}_3$ ):  $\delta$  (ppm) = 11.89 (brs, 1H), 7.54 (dd,  $J$  = 8.0, 1.5 Hz, 1H), 7.34 (td,  $J$  = 7.5, 1.5 Hz, 1H), 7.29 (td,  $J$  = 7.5, 1.5 Hz, 1H), 7.24 (dd,  $J$  = 8.0, 1.5 Hz, 1H), 7.01-6.98 (m, 2H), 6.90-6.87 (m, 2H), 6.56 (s, 1H), 3.82 (s, 1H), 3.77 (s, 1H).  $^{13}\text{C}$  NMR (125 MHz,  $\text{CDCl}_3$ ):  $\delta$  (ppm) = 164.5, 157.4, 154.0, 150.5, 145.6, 145.3, 133.4, 131.5, 128.7, 126.74, 125.6, 123.2, 116.7, 114.7, 95.8, 55.7, 52.9. HRMS (ESI): calcd. for  $\text{C}_{19}\text{H}_{17}\text{N}_2\text{O}_5$   $[\text{M}+\text{H}]^+$  353.1137, Found: 353.1128.

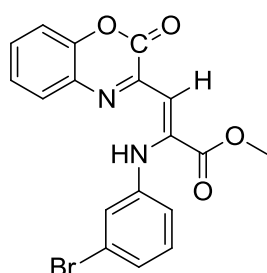

(**4f**): 76 mg, 63% yield, yellow solid: m.p. 168-170 °C.  $^1\text{H}$  NMR (500 MHz,  $\text{CDCl}_3$ ):  $\delta$  (ppm) = 11.75 (brs, 1H), 7.60 (dd,  $J$  = 8.0, 1.5 Hz, 1H), 7.39 (td,  $J$  = 8.0, 1.5 Hz, 1H), 7.32 (td,  $J$  = 8.0, 1.5 Hz, 1H), 7.28-7.26 (m, 2H), 7.22-7.18 (m, 2H), 6.91 (dd,  $J$  = 7.5, 1.5 Hz, 1H), 6.71 (s, 1H), 3.81 (s, 1H).  $^{13}\text{C}$  NMR (125 MHz,  $\text{CDCl}_3$ ):  $\delta$  (ppm) = 164.2, 153.7, 150.4, 145.4, 143.9, 141.7, 131.2, 130.6, 129.6, 127.7, 127.2, 125.8, 124.2, 123.0, 119.7, 116.8, 98.4, 53.1. HRMS (ESI): calcd. for  $\text{C}_{18}\text{H}_{14}\text{BrN}_2\text{O}_4$   $[\text{M}+\text{H}]^+$  401.0137, Found: 401.0125.

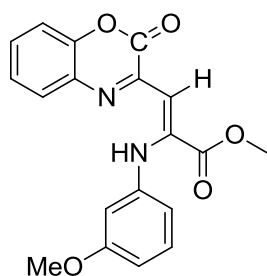

(**4g**): 75 mg, 71% yield, yellow solid: m.p. 129-131 °C.  $^1\text{H}$  NMR (500 MHz,  $\text{CDCl}_3$ ):  $\delta$  (ppm) = 11.83 (brs, 1H), 7.57 (dd,  $J$  = 8.0, 1.5 Hz, 1H), 7.36 (td,  $J$  = 7.5, 1.5 Hz, 1H), 7.30 (td,  $J$  = 8.0, 1.5 Hz, 1H), 7.26-7.23 (m, 2H), 6.71 (dd,  $J$  = 8.5, 2.5 Hz, 1H), 6.61-6.57 (m, 3H), 3.82 (s, 1H), 3.80 (s, 1H).  $^{13}\text{C}$  NMR (125 MHz,  $\text{CDCl}_3$ ):  $\delta$  (ppm) = 164.7, 160.6, 153.8, 150.5, 145.4, 144.8, 141.4, 131.4, 130.2, 129.2, 127.0, 125.7, 116.7, 113.7, 110.4, 107.2, 97.1, 55.5, 53.0. HRMS (ESI): calcd. for  $\text{C}_{19}\text{H}_{17}\text{N}_2\text{O}_5$   $[\text{M}+\text{H}]^+$  353.1137, Found: 353.1138.

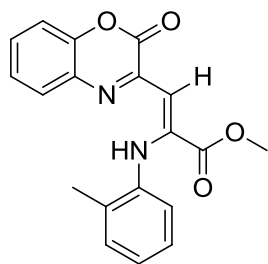

**(4h)**: 47 mg, 46% yield, yellow solid: m.p. 146-148 °C. <sup>1</sup>H NMR (500 MHz, CDCl<sub>3</sub>): δ (ppm) = 11.86 (brs, 1H), 7.50 (dd, *J* = 8.0, 1.5 Hz, 1H), 7.35 (td, *J* = 7.5, 1.5 Hz, 1H), 7.30 (td, *J* = 8.0, 1.5 Hz, 1H), 7.28-7.25 (m, 2H), 7.16 (td, *J* = 7.5, 1.0 Hz, 1H), 7.09 (td, *J* = 7.5, 1.0 Hz, 1H), 6.84 (dd, *J* = 8.0, 1.0 Hz, 1H), 6.65 (s, 1H), 3.77 (s, 1H), 2.49 (s, 1H). <sup>13</sup>C NMR (125 MHz, CDCl<sub>3</sub>): δ (ppm) = 164.6, 153.9, 150.5, 145.5, 145.4, 139.0, 131.5, 130.9, 129.7, 128.8, 126.9, 126.8, 125.7, 125.2, 121.5, 116.7, 96.8, 52.9, 18.4. HRMS (ESI): calcd. for C<sub>19</sub>H<sub>17</sub>N<sub>2</sub>O<sub>4</sub> [M+H]<sup>+</sup> 337.1188, Found: 337.1176.

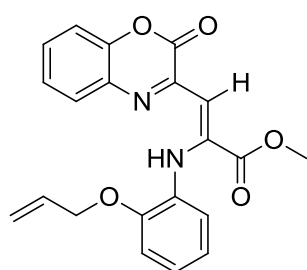

**(4i)**: 79 mg, 70% yield, yellow solid: m.p. 162-164 °C. <sup>1</sup>H NMR (500 MHz, CDCl<sub>3</sub>): δ (ppm) = 11.99 (brs, 1H), 7.58 (dd, *J* = 8.0, 1.5 Hz, 1H), 7.33 (td, *J* = 7.5, 1.5 Hz, 1H), 7.28-7.22 (m, 2H), 7.09-7.06 (m, 1H), 6.95-6.88 (m, 3H), 6.64 (s, 1H), 6.16-6.08 (m, 1H), 5.49 (dq, *J* = 17.5, 1.5 Hz, 1H), 5.31 (dq, *J* = 10.5, 1.5 Hz, 1H), 4.66 (dt, *J* = 5.0, 1.5 Hz, 2H), 3.81 (s, 1H). <sup>13</sup>C NMR (125 MHz, CDCl<sub>3</sub>): δ (ppm) = 164.7, 153.9, 150.3, 149.6, 145.4, 144.2, 133.0, 131.6, 129.6, 128.8, 127.3, 125.5, 125.0, 121.1, 120.6, 118.0, 116.5, 112.6, 96.8, 69.6, 52.8. HRMS (ESI): calcd. for C<sub>21</sub>H<sub>19</sub>N<sub>2</sub>O<sub>5</sub> [M+H]<sup>+</sup> 379.1294, Found: 379.1286.

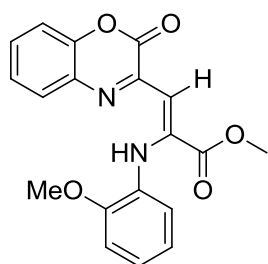

**(4j)**: 72 mg, 68% yield, yellow solid: m.p. 133-135 °C. <sup>1</sup>H NMR (500 MHz, CDCl<sub>3</sub>): δ (ppm) = 12.05 (brs, 1H), 7.54 (dd, *J* = 8.0, 1.5 Hz, 1H), 7.34 (td, *J* = 7.5, 1.5 Hz, 1H), 7.29 (td, *J* = 7.5, 1.5 Hz, 1H), 7.24 (dd, *J* = 7.5, 1.5 Hz, 1H), 7.12-7.08 (m, 1H), 6.94 (qd, *J* = 8.5, 1.0 Hz, 2H), 6.89 (dd, *J* = 8.0, 2.0 Hz, 1H), 6.61 (s, 1H), 3.96 (s, 3H), 3.82 (s, 3H). <sup>13</sup>C NMR (125 MHz, CDCl<sub>3</sub>): δ (ppm) = 164.7, 153.9, 150.6, 150.3, 145.4, 144.4, 131.6, 129.3, 128.8, 127.0, 125.6, 125.1, 121.0, 120.5, 116.6, 111.3, 96.4, 55.8, 52.8. HRMS (ESI): calcd. for C<sub>19</sub>H<sub>17</sub>N<sub>2</sub>O<sub>5</sub> [M+H]<sup>+</sup> 353.1137, Found: 353.1150.

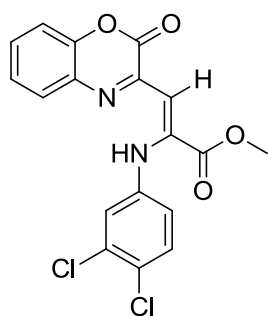

**(4k)**: 77 mg, 66% yield, yellow solid: m.p. 182-184 °C.  $^1\text{H}$  NMR (500 MHz,  $\text{CDCl}_3$ ):  $\delta$  (ppm) = 11.69 (brs, 1H), 7.59 (dd,  $J$  = 8.0, 1.5 Hz, 1H), 7.42-7.37 (m, 3H), 7.32 (td,  $J$  = 7.5, 1.5 Hz, 1H), 7.27 (dd,  $J$  = 8.0, 1.5 Hz, 1H), 7.11 (d,  $J$  = 2.5 Hz, 1H), 6.82 (dd,  $J$  = 8.5, 2.5 Hz, 1H), 6.74 (s, 1H), 3.83 (s, 3H).  $^{13}\text{C}$  NMR (125 MHz,  $\text{CDCl}_3$ ):  $\delta$  (ppm) = 164.0, 153.6, 150.3, 145.4, 143.5, 140.0, 133.2, 131.0, 130.8, 129.8, 128.3, 127.2, 125.8, 122.9, 120.5, 116.8, 99.0, 53.2. HRMS (ESI): calcd. for  $\text{C}_{18}\text{H}_{13}\text{Cl}_2\text{N}_2\text{O}_4$   $[\text{M}+\text{H}]^+$  391.0252, Found: 391.0251.

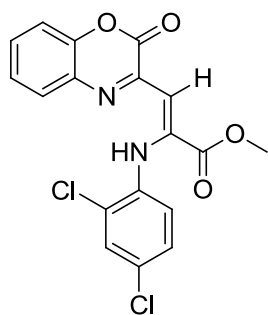

**(4l)**: 72 mg, 61% yield, yellow solid: m.p. 239-241 °C.  $^1\text{H}$  NMR (500 MHz,  $\text{CDCl}_3$ ):  $\delta$  (ppm) = 11.98 (brs, 1H), 7.63 (dd,  $J$  = 8.0, 1.5 Hz, 1H), 7.47 (d,  $J$  = 2.5 Hz, 1H), 7.41 (td,  $J$  = 8.0, 1.5 Hz, 1H), 7.34 (td,  $J$  = 8.0, 1.5 Hz, 1H), 7.28 (dd,  $J$  = 8.0, 1.0 Hz, 1H), 7.18 (dd,  $J$  = 8.5, 2.0 Hz, 1H), 6.83 (s, 1H), 6.78 (d,  $J$  = 8.5 Hz, 1H), 3.84 (s, 3H).  $^{13}\text{C}$  NMR (125 MHz,  $\text{CDCl}_3$ ):  $\delta$  (ppm) = 164.1, 153.6, 150.0, 145.7, 142.6, 136.4, 131.2, 129.8, 129.8, 129.5, 127.7, 127.6, 125.9, 125.8, 121.8, 116.8, 100.2, 53.2. HRMS (ESI): calcd. for  $\text{C}_{18}\text{H}_{13}\text{Cl}_2\text{N}_2\text{O}_4$   $[\text{M}+\text{H}]^+$  391.0252, Found: 391.0246.

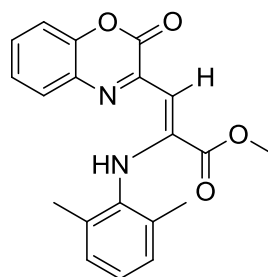

**(4m)**: 61 mg, 58% yield, yellow solid: m.p. 128-129 °C.  $^1\text{H}$  NMR (500 MHz,  $\text{CDCl}_3$ ):  $\delta$  (ppm) = 11.64 (brs, 1H), 7.50 (dd,  $J$  = 8.0, 1.5 Hz, 1H), 7.33 (td,  $J$  = 8.0, 1.5 Hz, 1H), 7.28 (dd,  $J$  = 7.5, 1.5 Hz, 1H), 7.27-7.25 (m, 1H), 7.12-7.11 (m, 3H), 6.68 (s, 1H), 3.68 (s, 3H), 2.28 (s, 6H).  $^{13}\text{C}$  NMR (125 MHz,  $\text{CDCl}_3$ ):  $\delta$  (ppm) = 163.6, 154.1, 150.9, 148.1, 145.2, 138.3, 134.8, 131.6, 128.4, 128.3, 127.0, 126.7, 125.6, 116.7, 93.6, 52.8, 18.7. HRMS (ESI): calcd. for  $\text{C}_{20}\text{H}_{19}\text{N}_2\text{O}_4$   $[\text{M}+\text{H}]^+$  351.1345, Found: 351.1344.

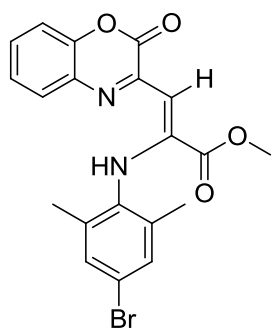

**(4n)**: 58 mg, 45% yield, yellow solid: m.p. 157-158 °C. <sup>1</sup>H NMR (500 MHz, CDCl<sub>3</sub>): δ (ppm) = 11.75 (brs, 1H), 7.50 (dd, *J* = 7.5, 1.5 Hz, 1H), 7.36-7.33 (m, 1H), 7.30-7.25 (m, 2H), 7.25 (s, 2H), 6.71 (s, 1H), 3.71 (s, 3H), 2.24 (s, 6H). <sup>13</sup>C NMR (125 MHz, CDCl<sub>3</sub>): δ (ppm) = 163.4, 154.0, 150.7, 147.5, 145.2, 137.6, 136.8, 131.4, 131.1, 128.7, 126.7, 125.7, 120.1, 116.7, 94.3, 52.9, 18.5. HRMS

(ESI): calcd. for C<sub>20</sub>H<sub>18</sub>BrN<sub>2</sub>O<sub>4</sub> [M+H]<sup>+</sup> 429.0450, Found: 429.0477.

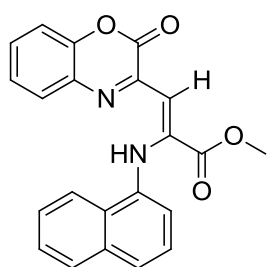

**(4o)**: 76 mg, 68% yield, yellow solid: m.p. 180-182 °C. <sup>1</sup>H NMR (500 MHz, CDCl<sub>3</sub>): δ (ppm) = 12.53 (brs, 1H), 8.26 (d, *J* = 8.5 Hz, 1H), 7.92 (d, *J* = 8.0 Hz, 1H), 7.70 (d, *J* = 8.5 Hz, 1H), 7.65 (t, *J* = 7.5 Hz, 1H), 7.59 (t, *J* = 7.5 Hz, 1H), 7.50 (d, *J* = 8.0 Hz, 1H), 7.42 (t, *J* = 8.0 Hz, 1H), 7.36 (t, *J* = 7.5 Hz, 1H), 7.29-

7.26 (m, 2H), 7.30 (d, *J* = 7.0 Hz, 1H), 6.77 (s, 1H), 3.72 (s, 3H). <sup>13</sup>C NMR (125 MHz, CDCl<sub>3</sub>): δ (ppm) = 164.6, 153.9, 150.5, 146.0, 145.4, 136.6, 134.4, 131.35, 129.0, 128.7, 127.6, 127.0, 126.9, 126.7, 125.7, 125.7, 125.6, 121.8, 118.2, 116.7, 97.6, 52.90. HRMS (ESI): calcd. for C<sub>22</sub>H<sub>17</sub>N<sub>2</sub>O<sub>4</sub> [M+H]<sup>+</sup> 373.1188, Found: 373.1188.

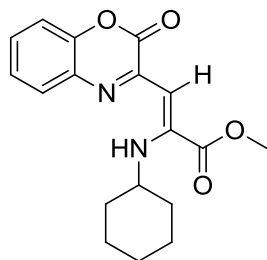

**(4p)**: 51 mg, 52% yield, yellow solid: m.p. 122-123 °C. <sup>1</sup>H NMR (500 MHz, CDCl<sub>3</sub>): δ (ppm) = 10.83 (brs, 1H), 7.48-7.45 (m, 1H), 7.29-7.24 (m, 2H), 7.22-7.19 (m, 1H), 6.37 (s, 1H), 4.00 (s, 1H), 3.89 (s, 1H), 1.99-1.97 (m, 2H), 1.80-1.76 (m, 2H), 1.62-1.59 (m, 1H), 1.46-1.37 (m, 5H). <sup>13</sup>C NMR (125 MHz, CDCl<sub>3</sub>): δ (ppm) = 164.0, 154.4, 150.6, 147.9, 145.0, 132.1, 127.5, 126.1, 125.4, 116.5, 92.0,

53.3, 52.8, 34.5, 25.6, 24.2. HRMS (ESI): calcd. for C<sub>18</sub>H<sub>21</sub>N<sub>2</sub>O<sub>4</sub> [M+H]<sup>+</sup> 329.1501, Found: 329.1490.



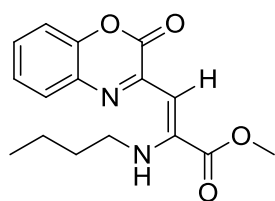

**(4q)**: 70 mg, 77% yield, yellow solid: m.p. 101-103 °C.  $^1\text{H}$  NMR (500 MHz,  $\text{CDCl}_3$ ):  $\delta$  (ppm) = 10.69 (brs, 1H), 7.46-7.43 (m, 1H), 7.29-7.25 (m, 2H), 7.22-7.19 (m, 1H), 6.41 (s, 1H), 3.89 (s, 1H), 3.64 (t,  $J$  = 7.0 Hz, 2H), 1.72-1.66 (m, 1H), 1.55-1.49 (m, 1H), 1.00 (t,  $J$  = 7.0 Hz, 3H).  $^{13}\text{C}$  NMR (125 MHz,  $\text{CDCl}_3$ ):  $\delta$  (ppm) = 163.9, 154.4, 150.6, 148.6, 145.1, 132.0, 127.6, 126.2, 125.5, 116.6, 92.0, 52.8, 45.2, 32.8, 20.1, 13.9. HRMS (ESI): calcd. for  $\text{C}_{16}\text{H}_{19}\text{N}_2\text{O}_4$   $[\text{M}+\text{H}]^+$  303.1345, Found: 303.1349.

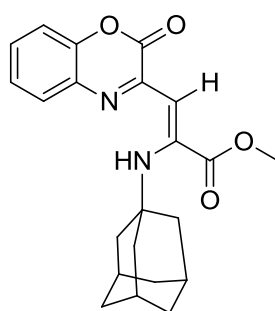

**(4r)**: 63 mg, 55% yield, yellow solid: m.p. 178-179 °C.  $^1\text{H}$  NMR (500 MHz,  $\text{CDCl}_3$ ):  $\delta$  (ppm) = 10.92 (brs, 1H), 7.45-7.43 (m, 1H), 7.27-7.23 (m, 2H), 7.21-7.17 (m, 1H), 6.04 (s, 1H), 3.89 (s, 3H), 2.15 (s, 2H), 2.03 (t,  $J$  = 3.0 Hz, 6H), 1.70 (t,  $J$  = 15.0 Hz, 6H).  $^{13}\text{C}$  NMR (125 MHz,  $\text{CDCl}_3$ ):  $\delta$  (ppm) = 165.8, 154.3, 150.5, 149.8, 144.9, 132.0, 127.3, 126.0, 125.4, 116.5, 91.2, 55.3, 52.9, 43.4, 36.1, 29.8. HRMS (ESI): calcd. for  $\text{C}_{22}\text{H}_{25}\text{N}_2\text{O}_4$   $[\text{M}+\text{H}]^+$  381.1814, Found: 381.1836.

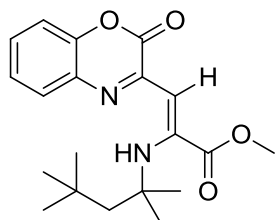

**(4s)**: 68 mg, 63% yield, yellow solid: m.p. 100-102 °C.  $^1\text{H}$  NMR (500 MHz,  $\text{CDCl}_3$ ):  $\delta$  (ppm) = 11.15 (brs, 1H), 7.43-7.40 (m, 1H), 7.27-7.23 (m, 2H), 7.21-7.18 (m, 1H), 6.00 (s, 1H), 3.89 (s, 3H), 1.81 (s, 2H), 1.48 (s, 6H), 1.04 (s, 9H).  $^{13}\text{C}$  NMR (125 MHz,  $\text{CDCl}_3$ ):  $\delta$  (ppm) = 165.6, 154.4, 150.5, 150.2, 145.0, 132.0, 127.1, 125.7, 125.4, 116.6, 90.5, 58.1, 54.6, 52.9, 31.9, 31.6, 30.9. HRMS (ESI): calcd. for  $\text{C}_{20}\text{H}_{27}\text{N}_2\text{O}_4$   $[\text{M}+\text{H}]^+$  359.1971, Found: 359.1977.

# 6 $^1\text{H}$ NMR and $^{13}\text{C}$ NMR Spectra of All Compounds

## Compound 3a

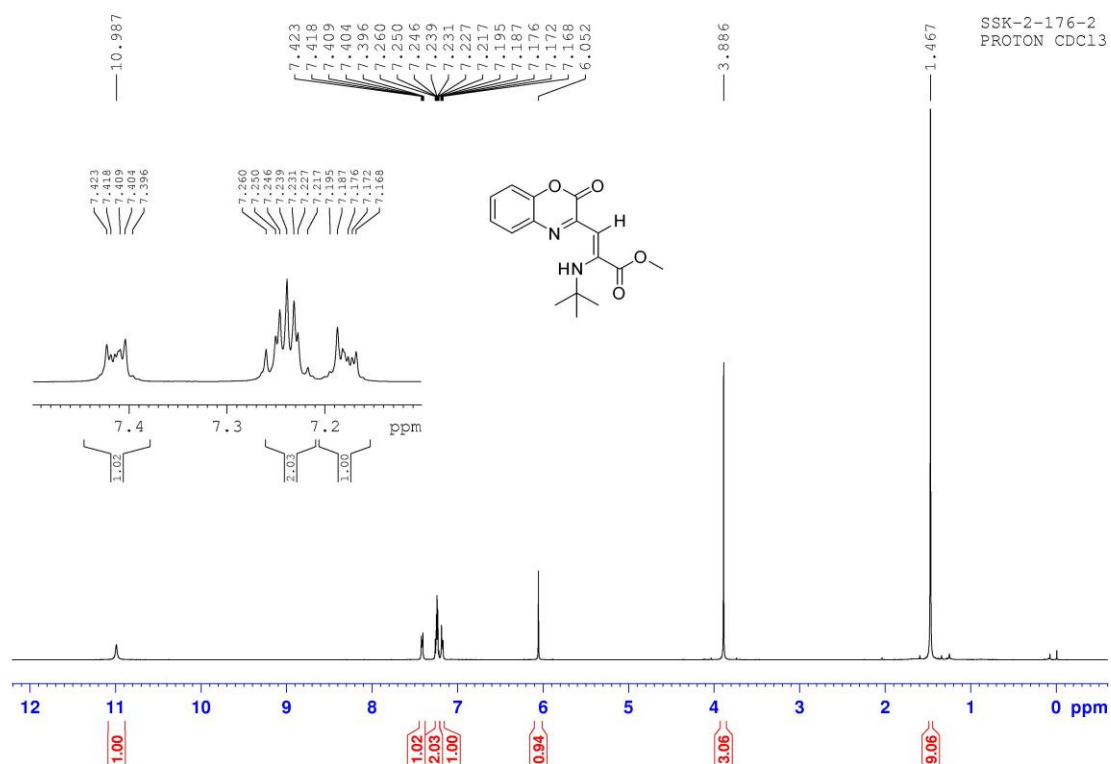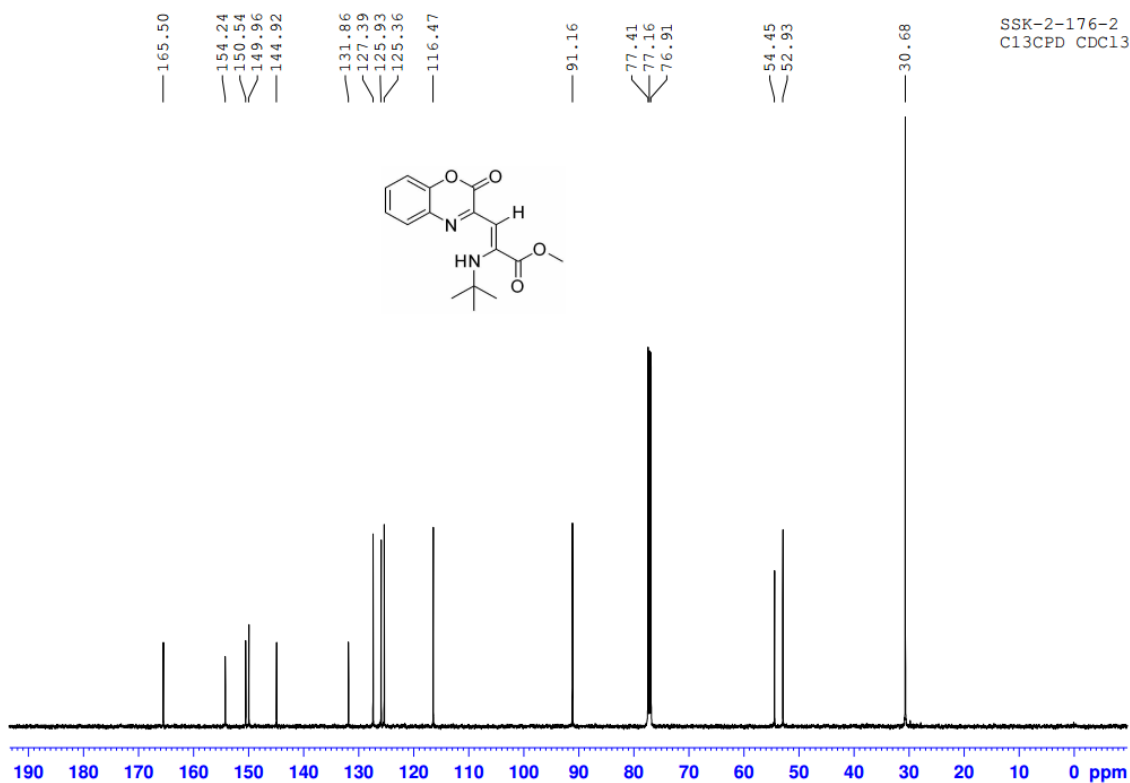

# Compound 3b

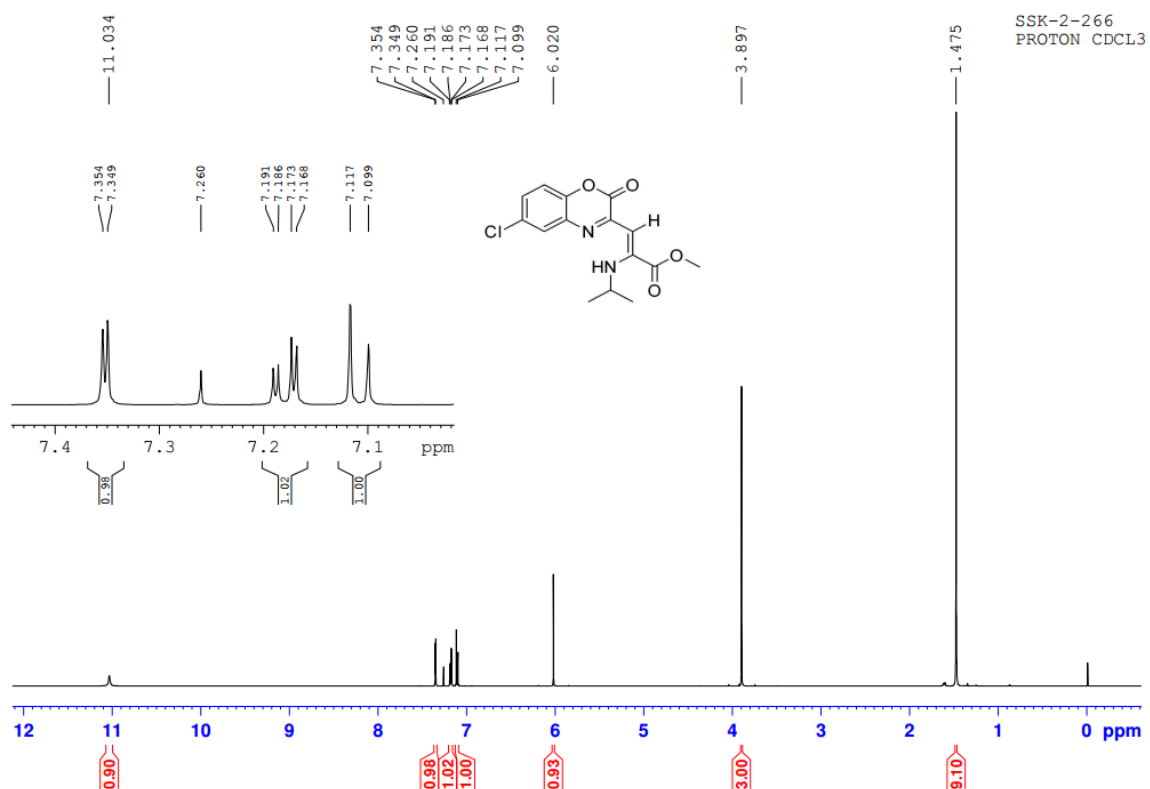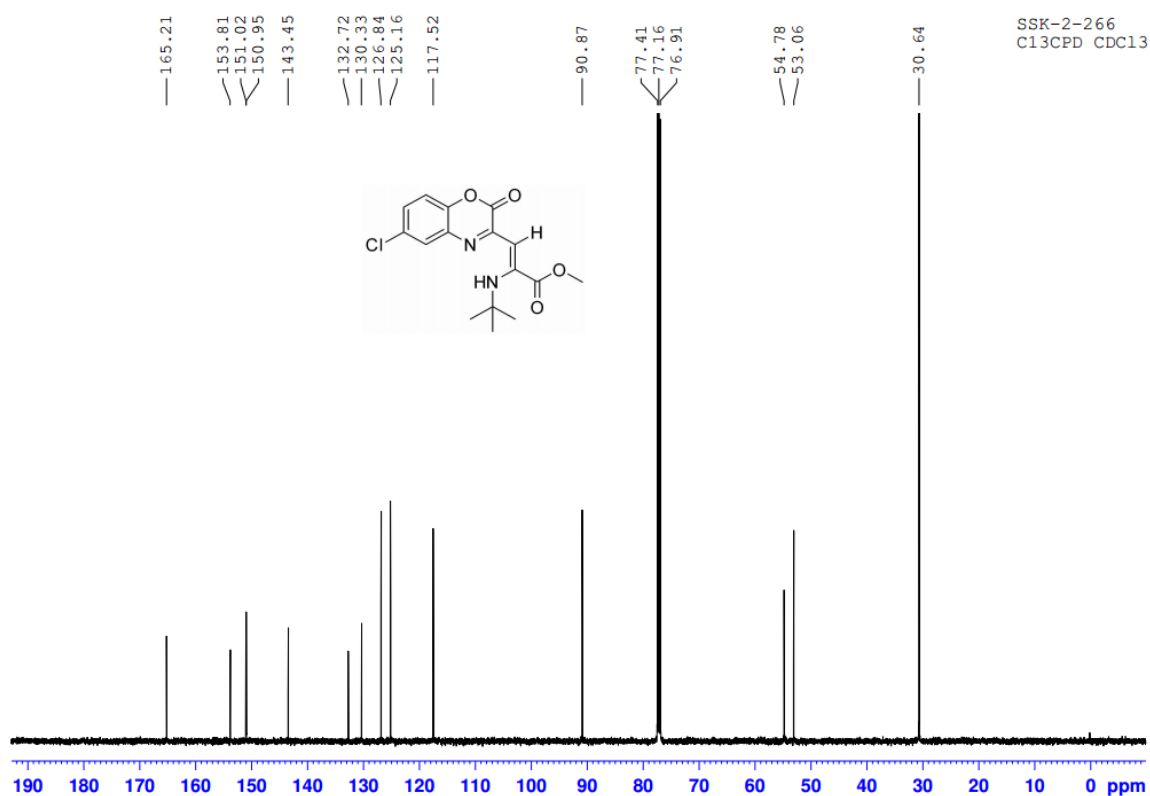

# Compound 3c

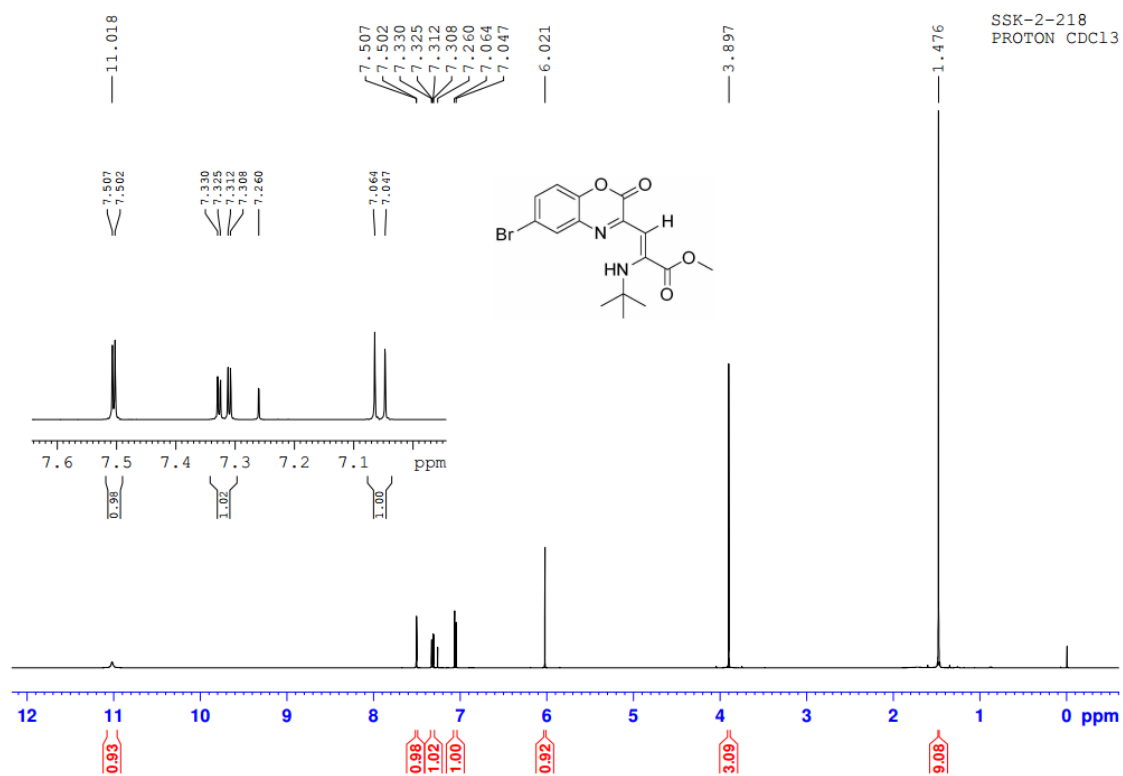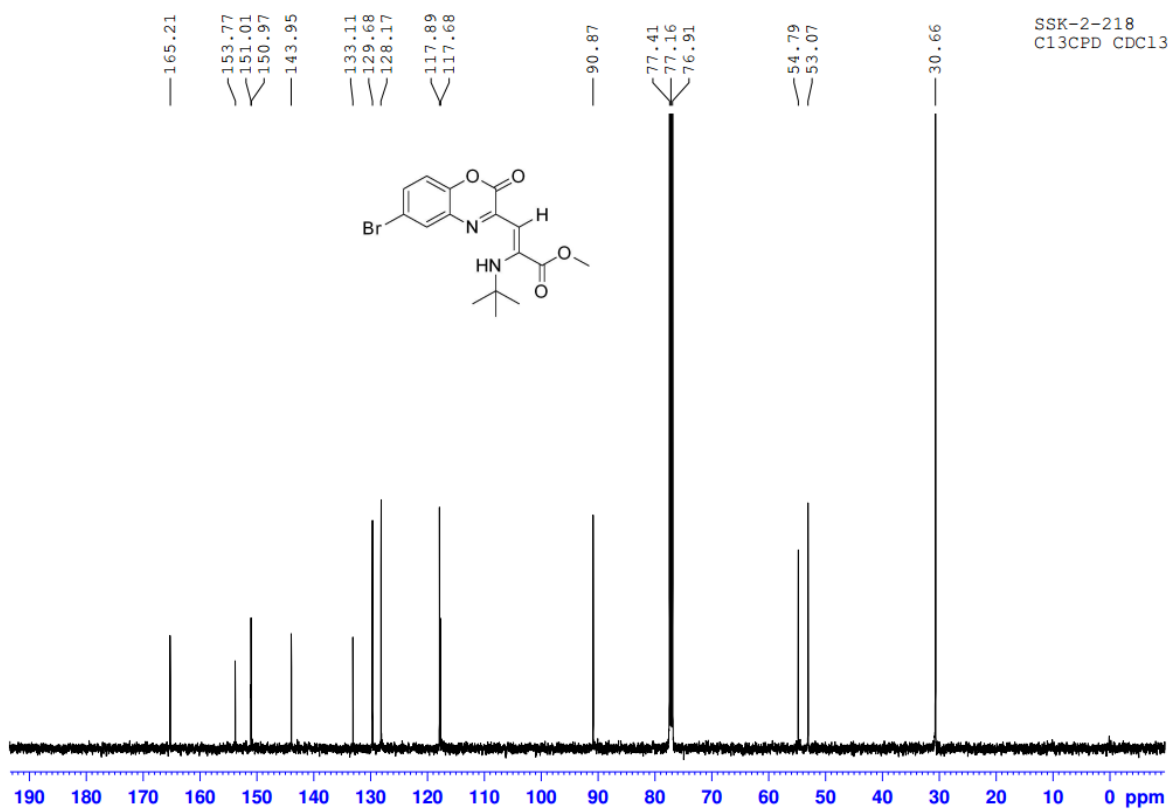

# Compound 3d

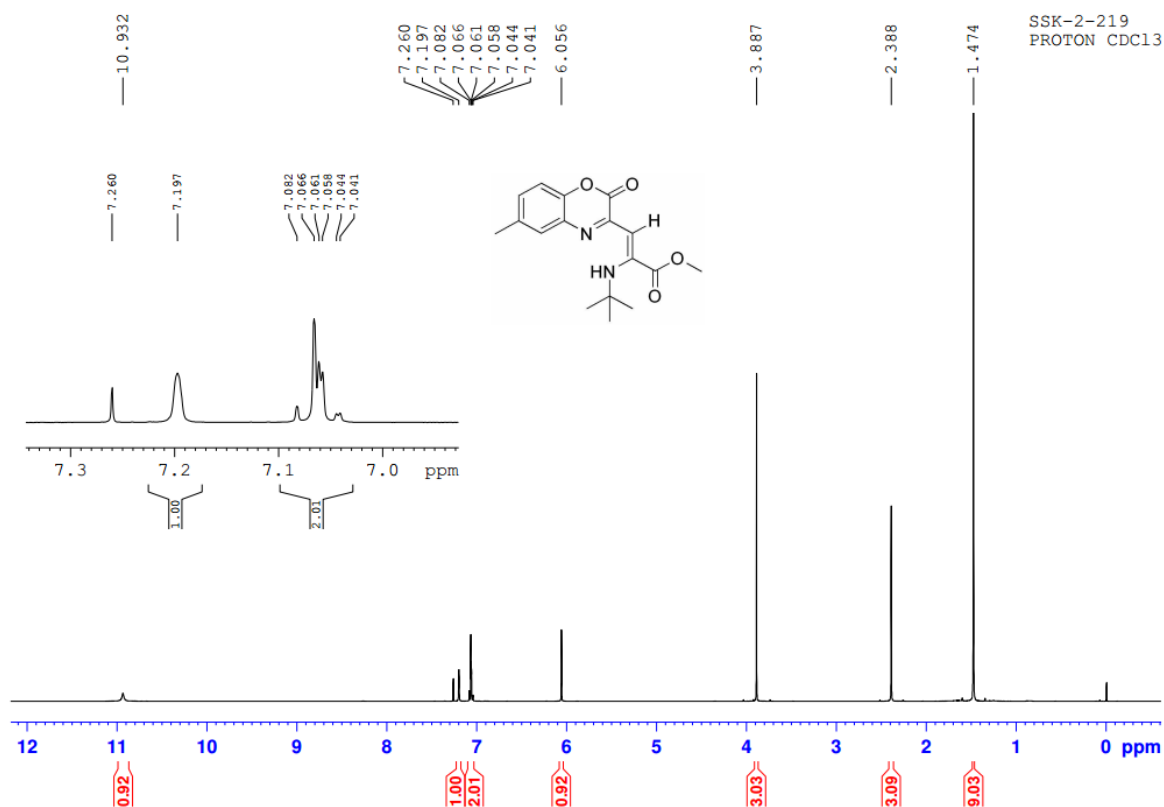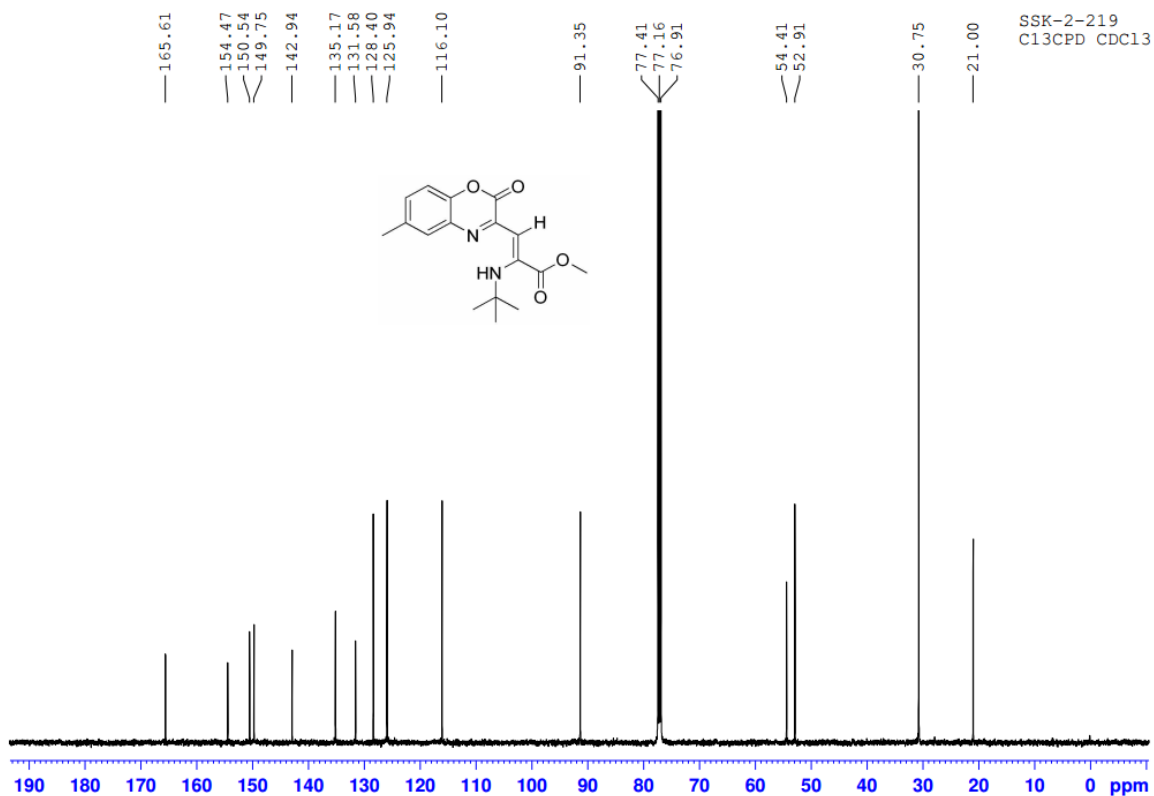

# Compound 3e

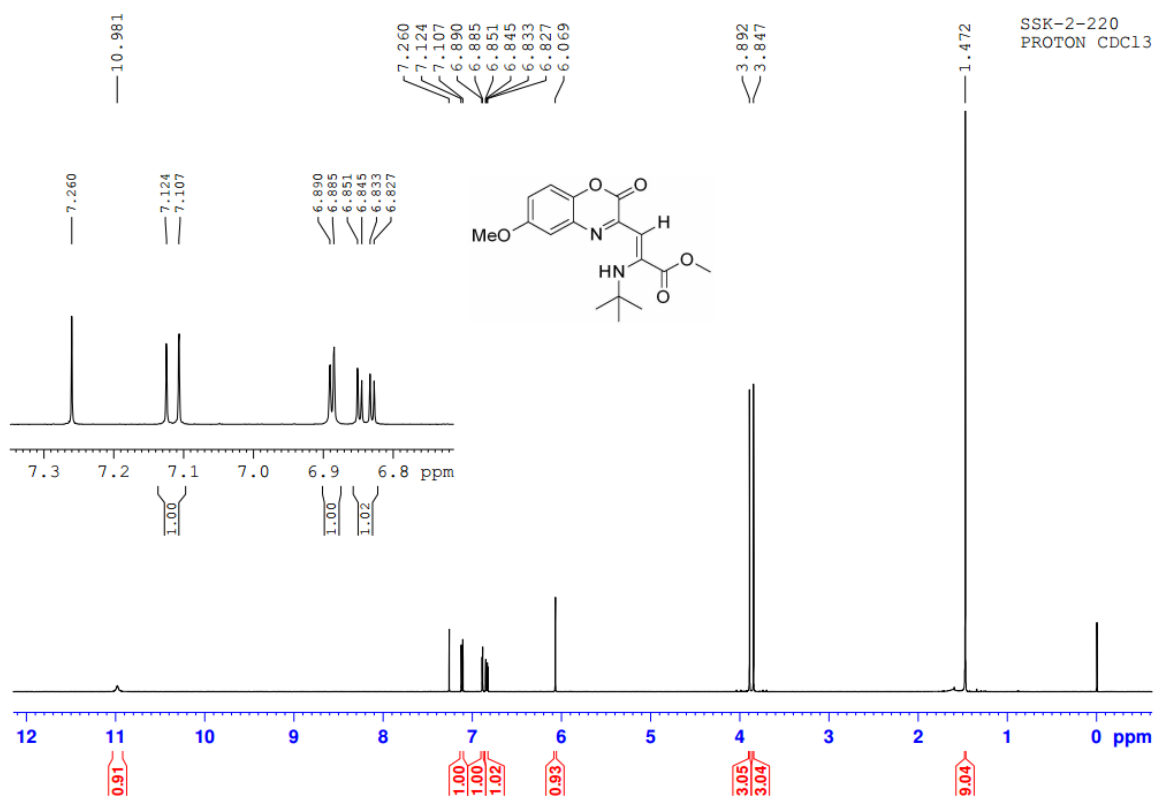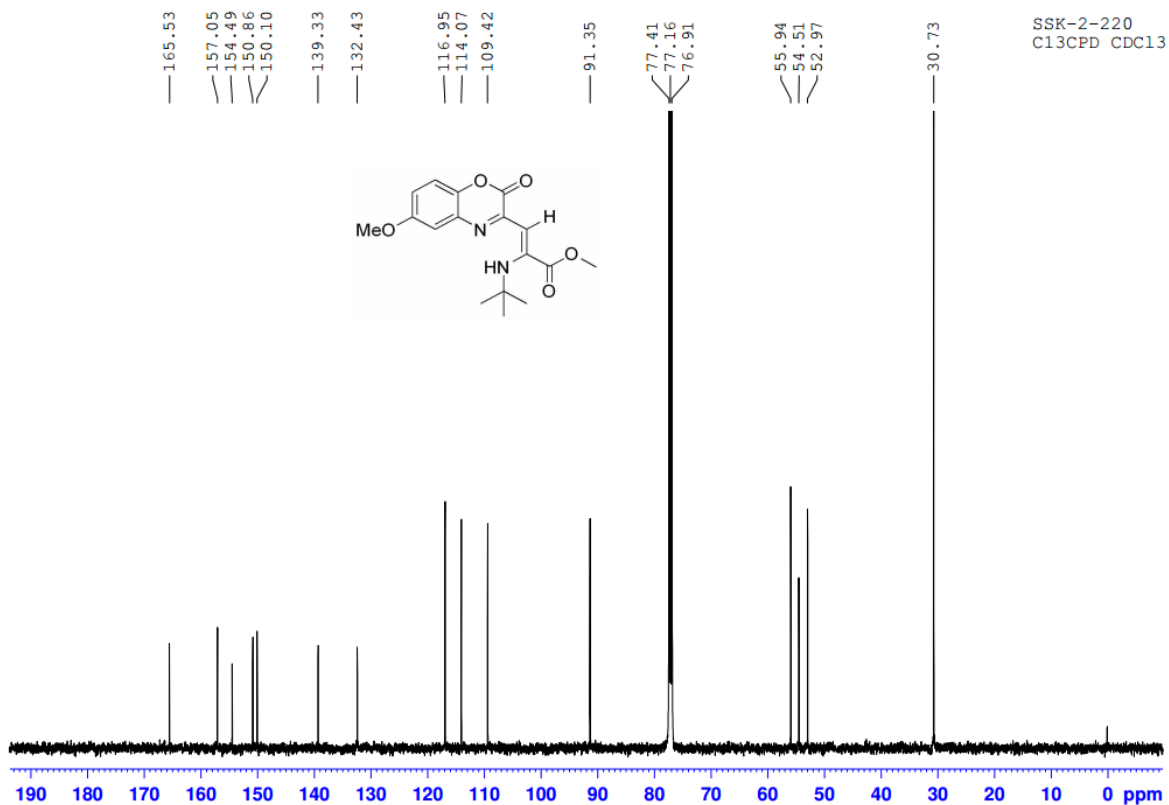

# Compound 3f

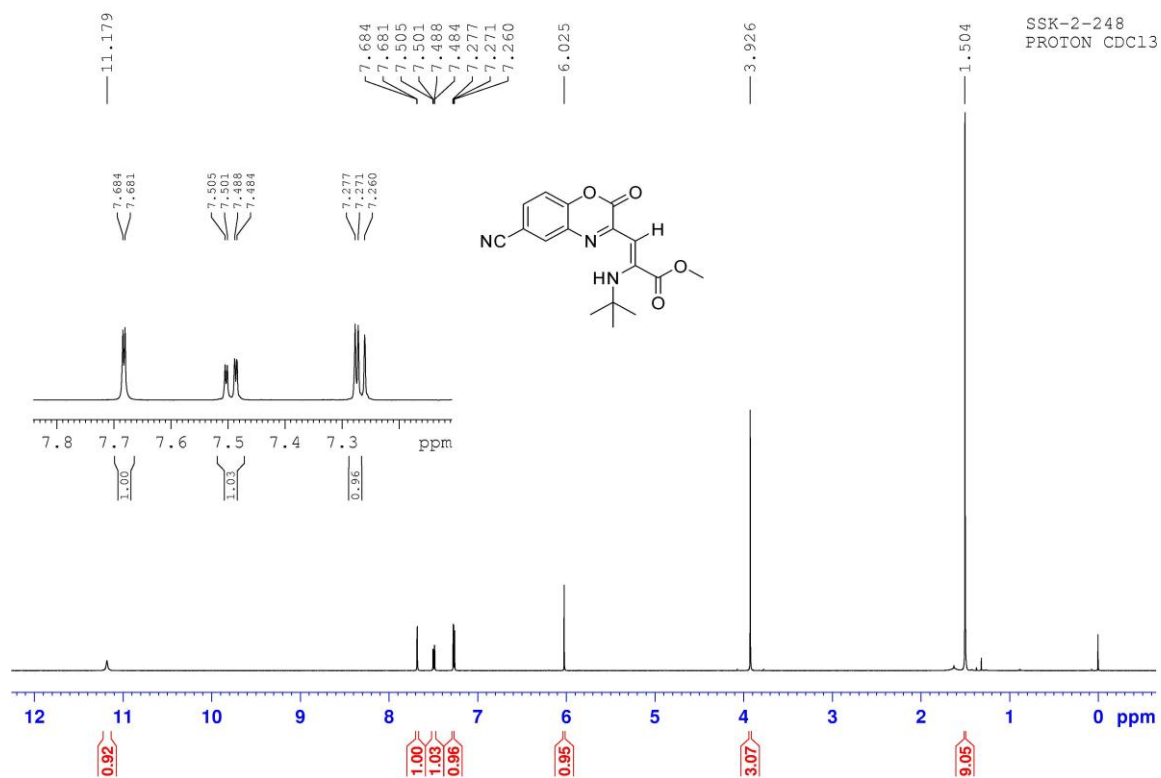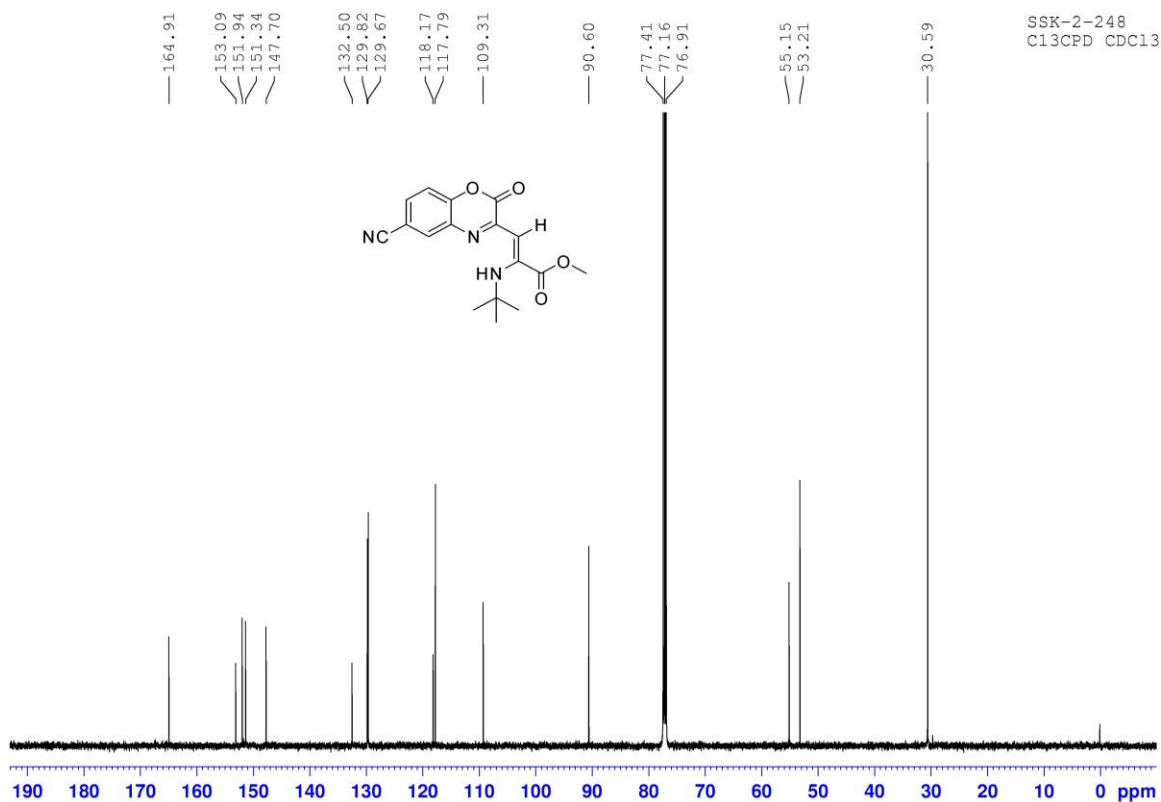

# Compound 3g

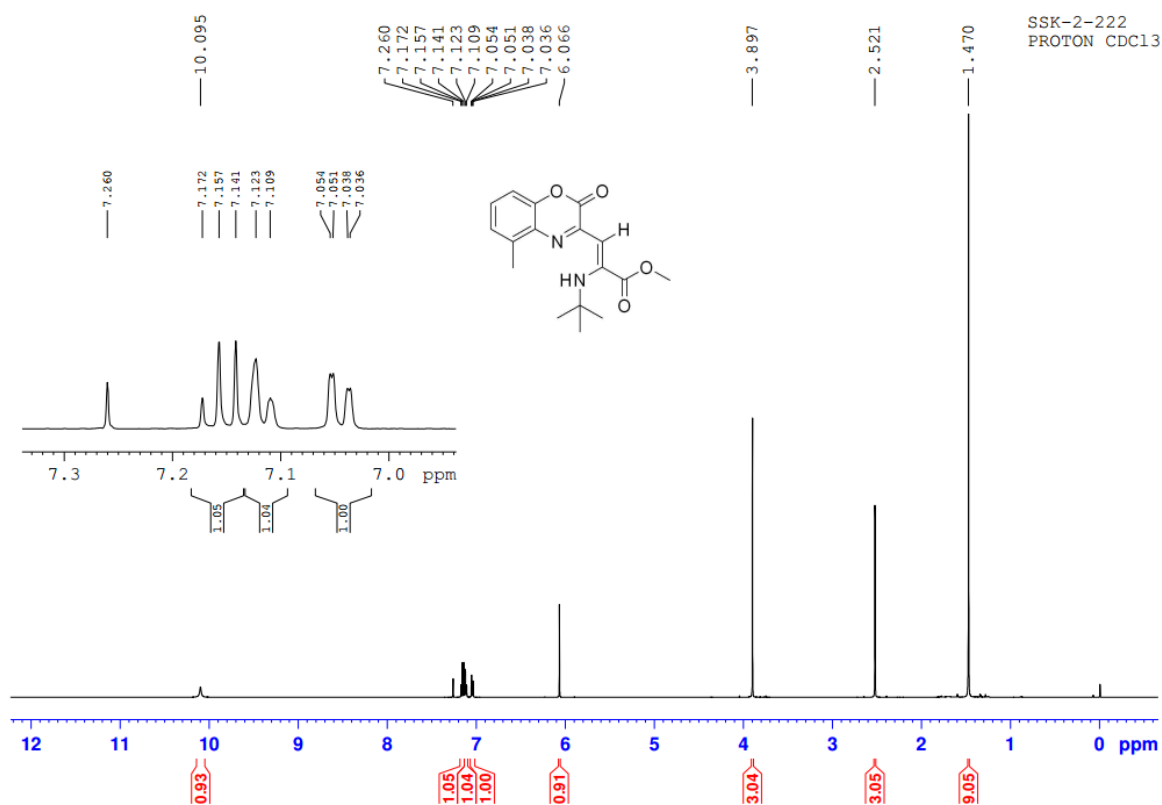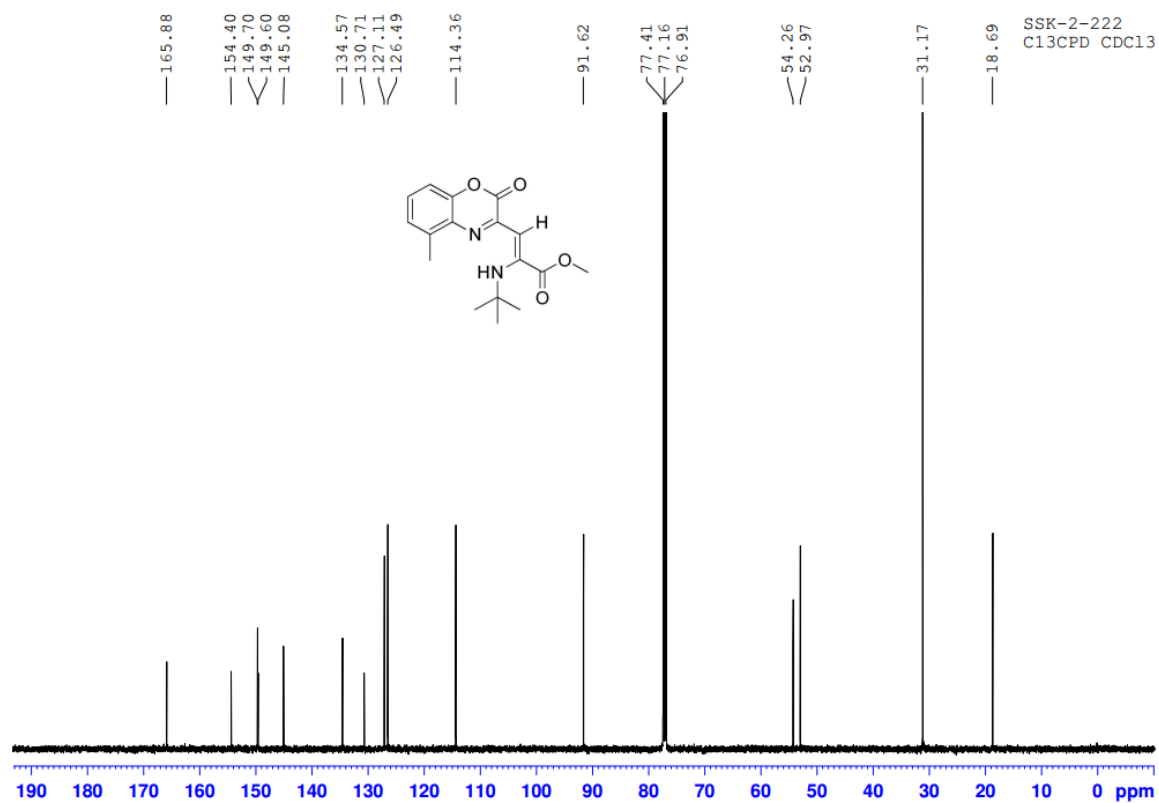



# Compound 3h

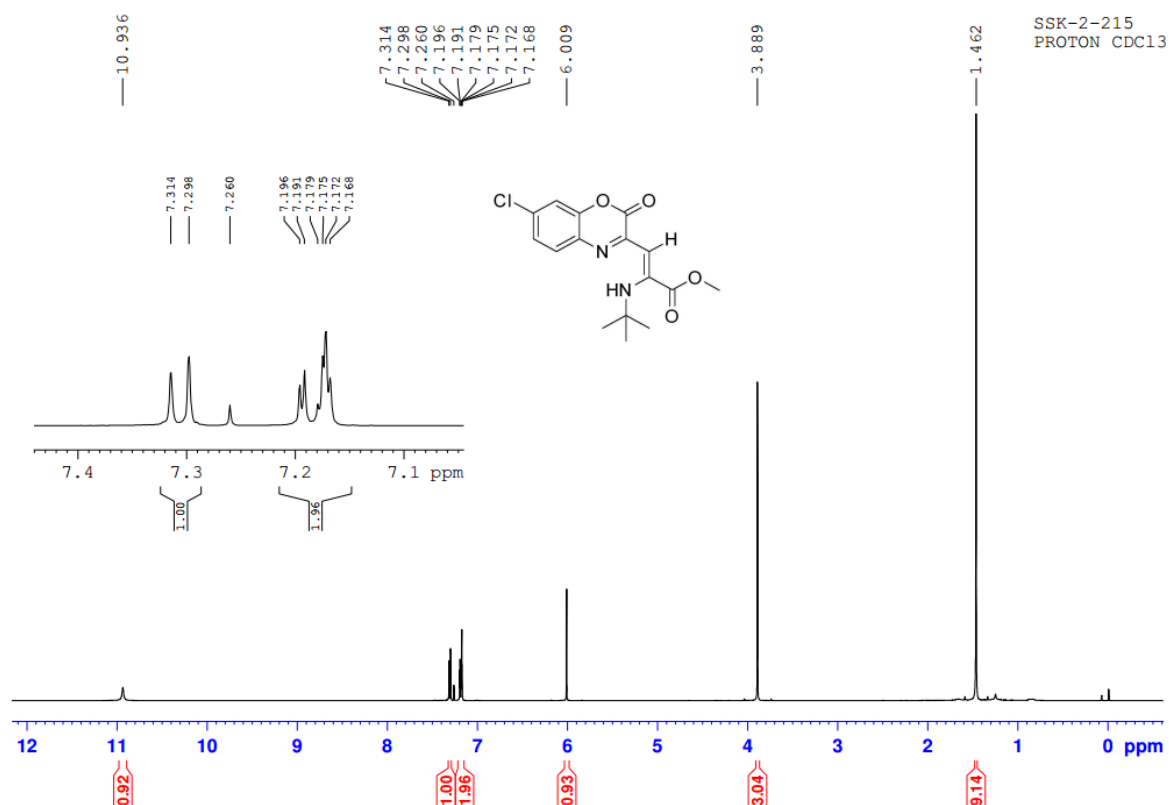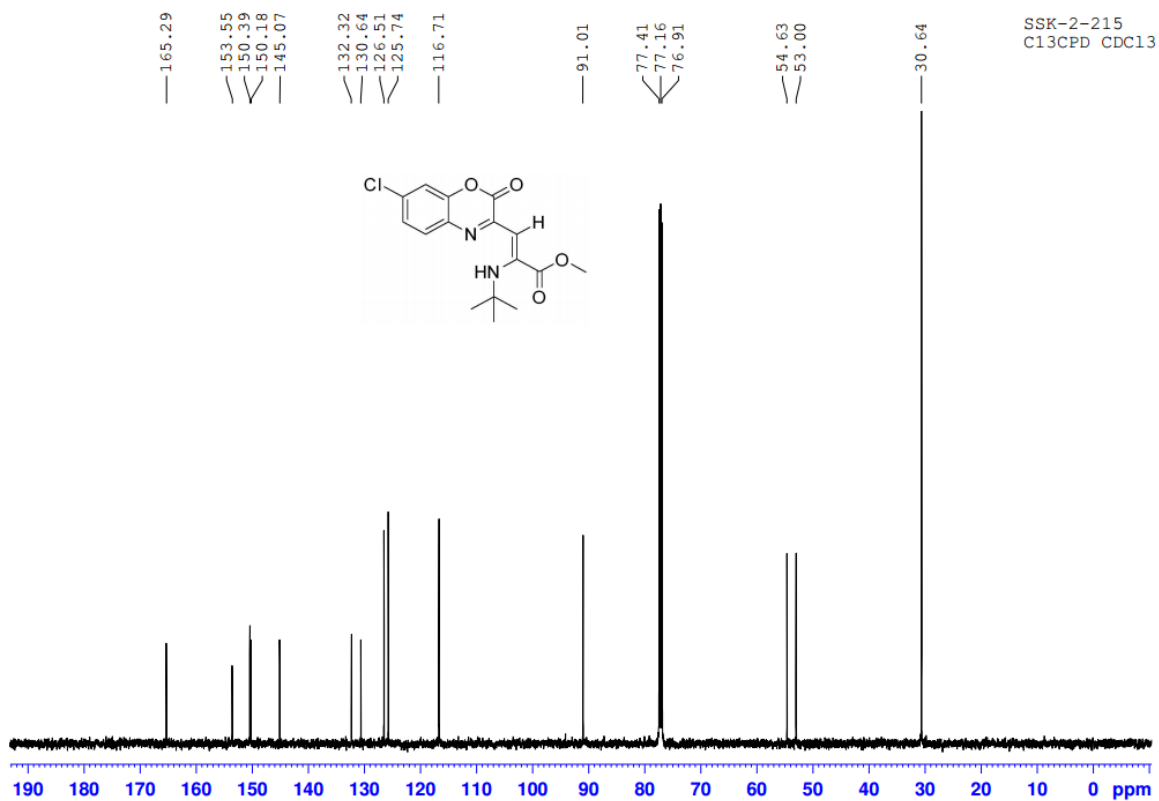

# Compound 3i

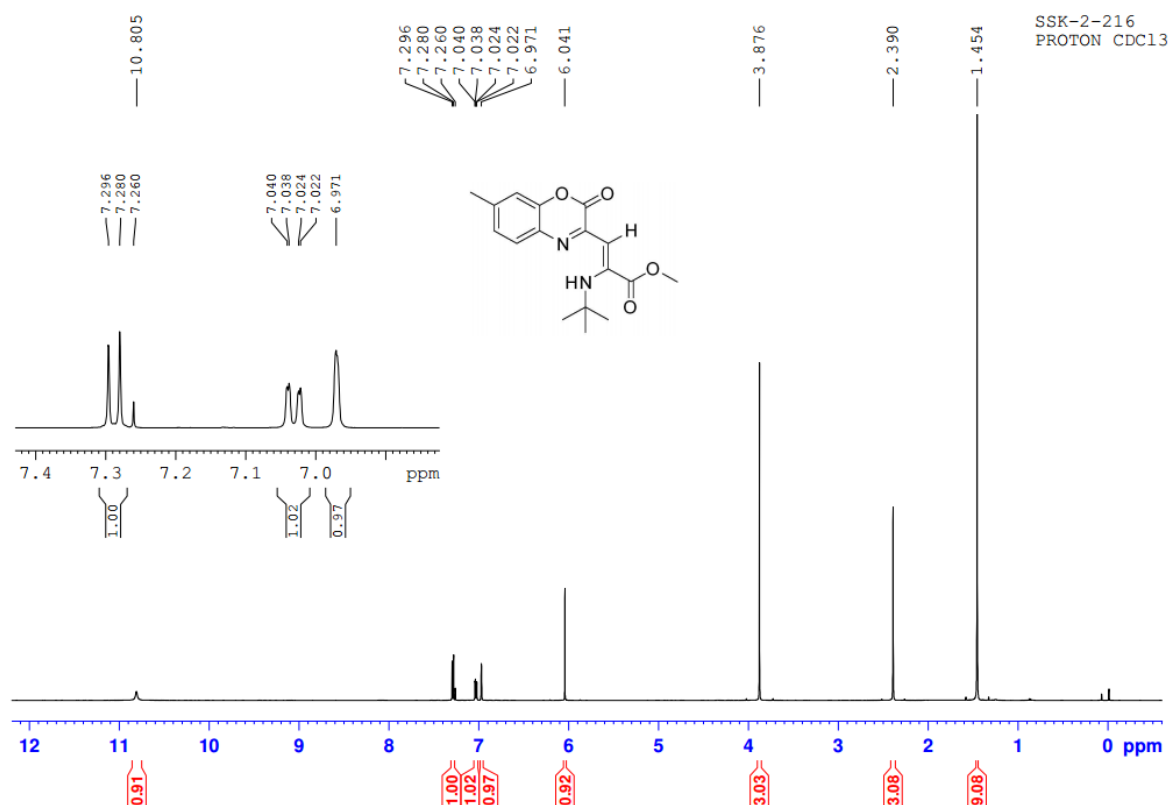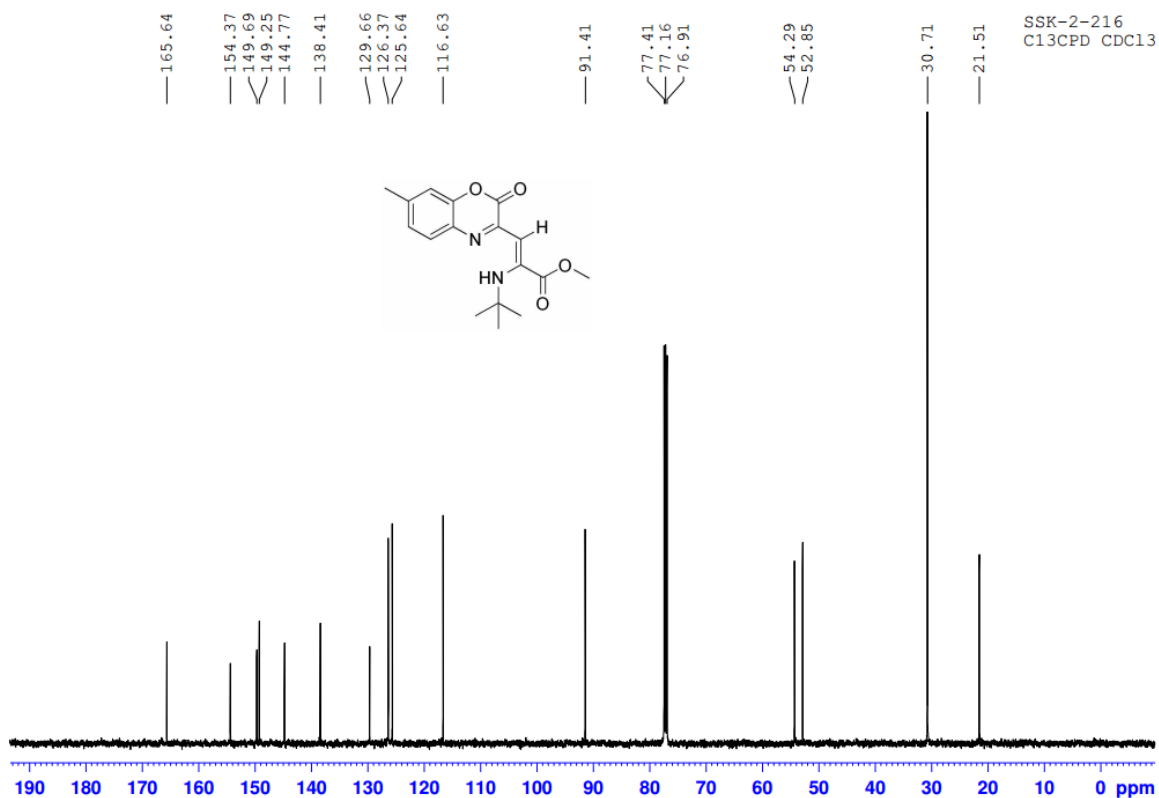

# Compound 3j

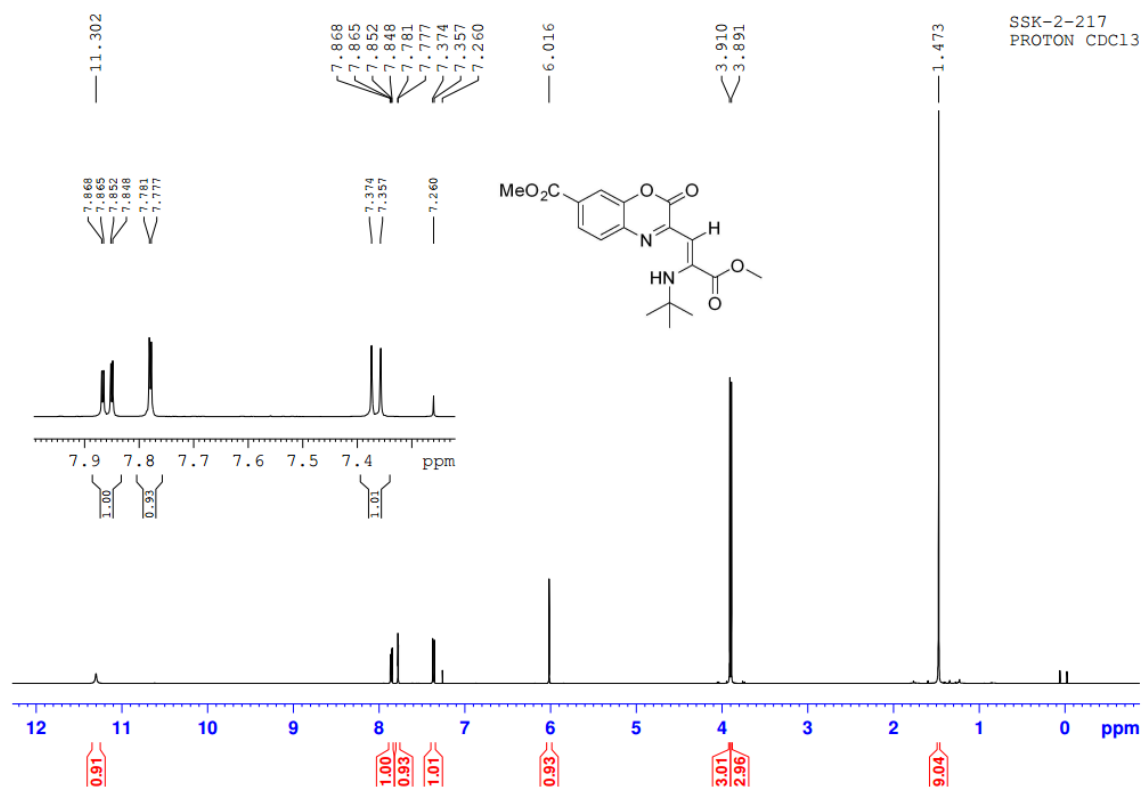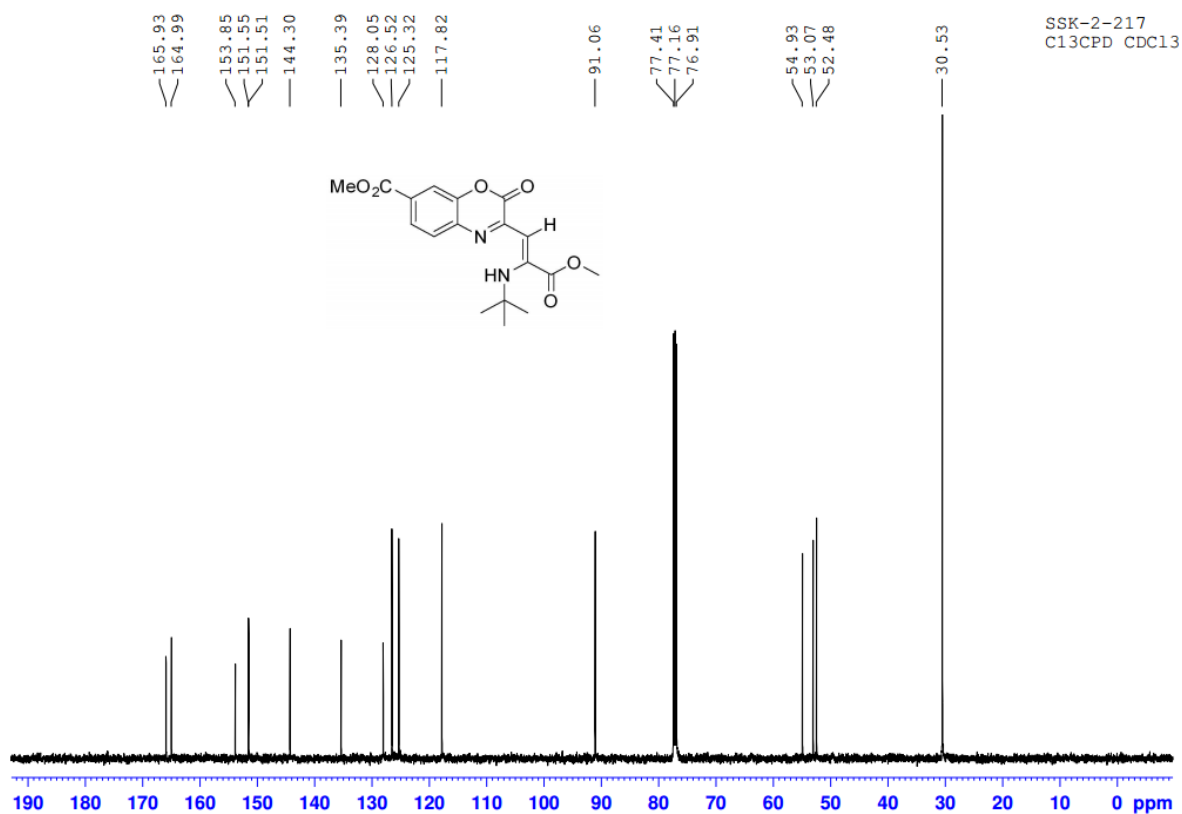

# Compound **3k**

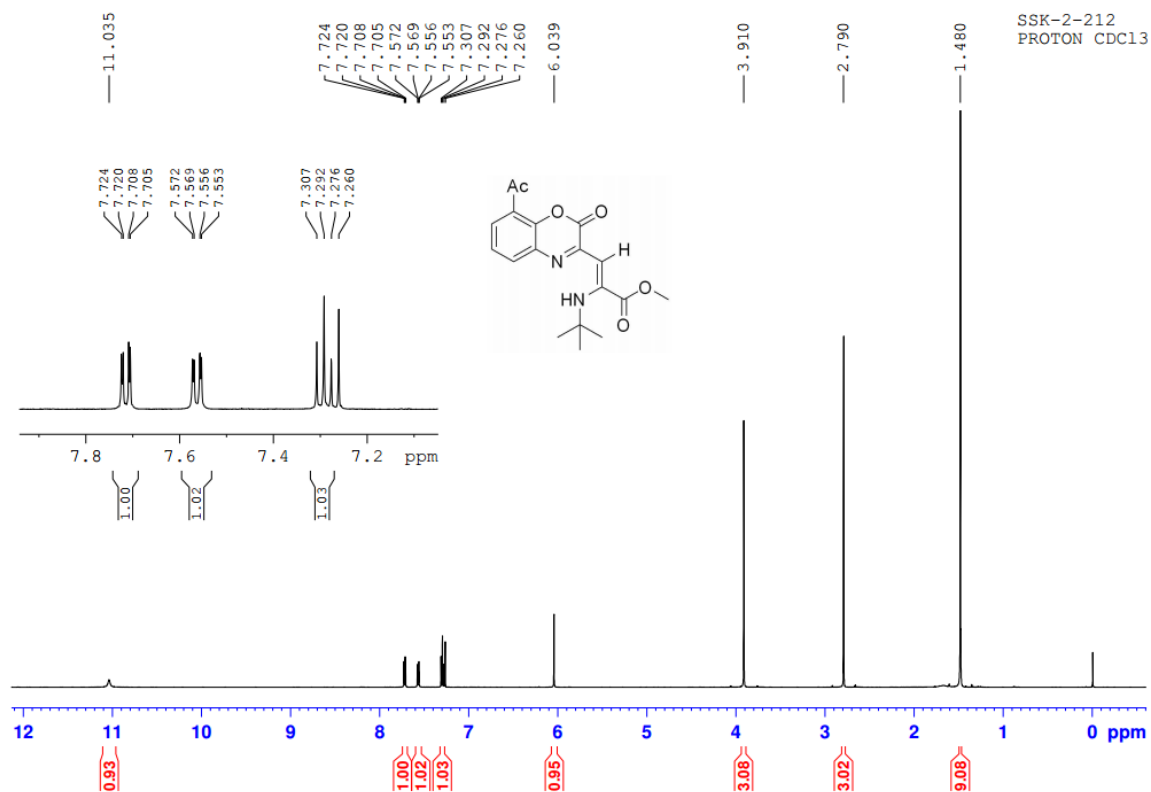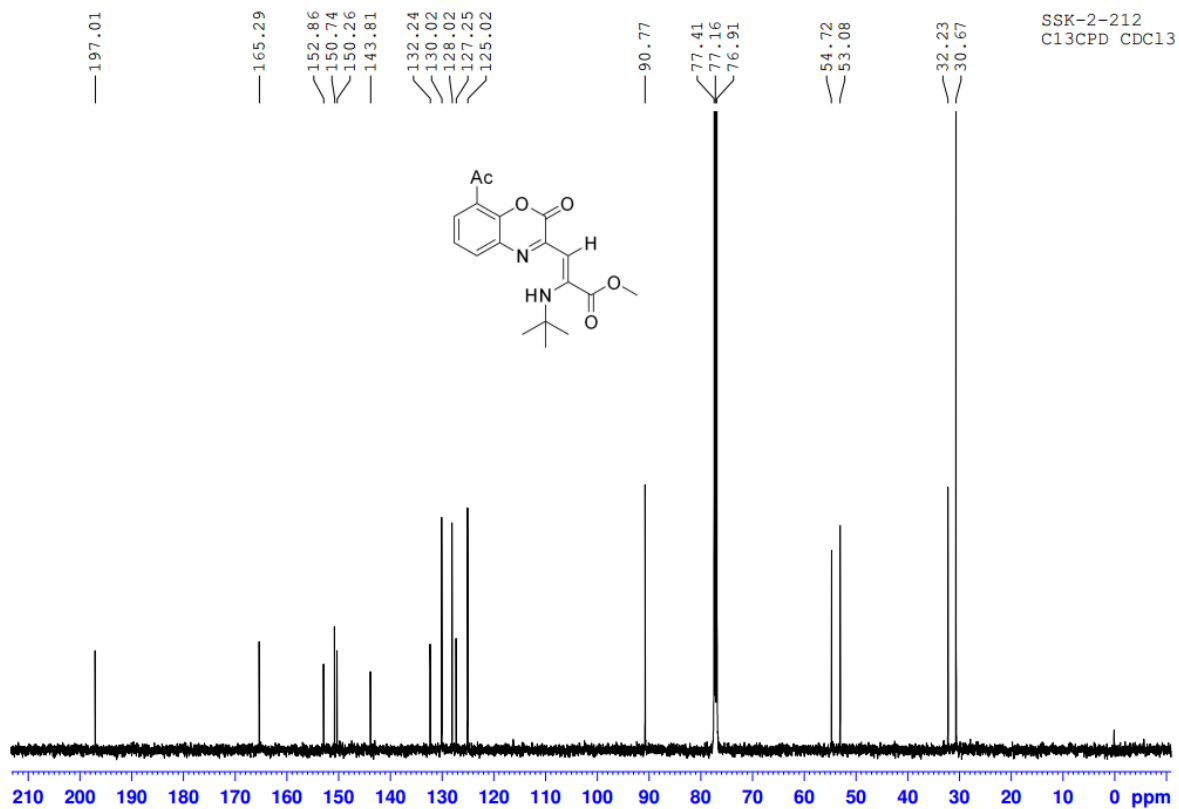

# Compound 3l

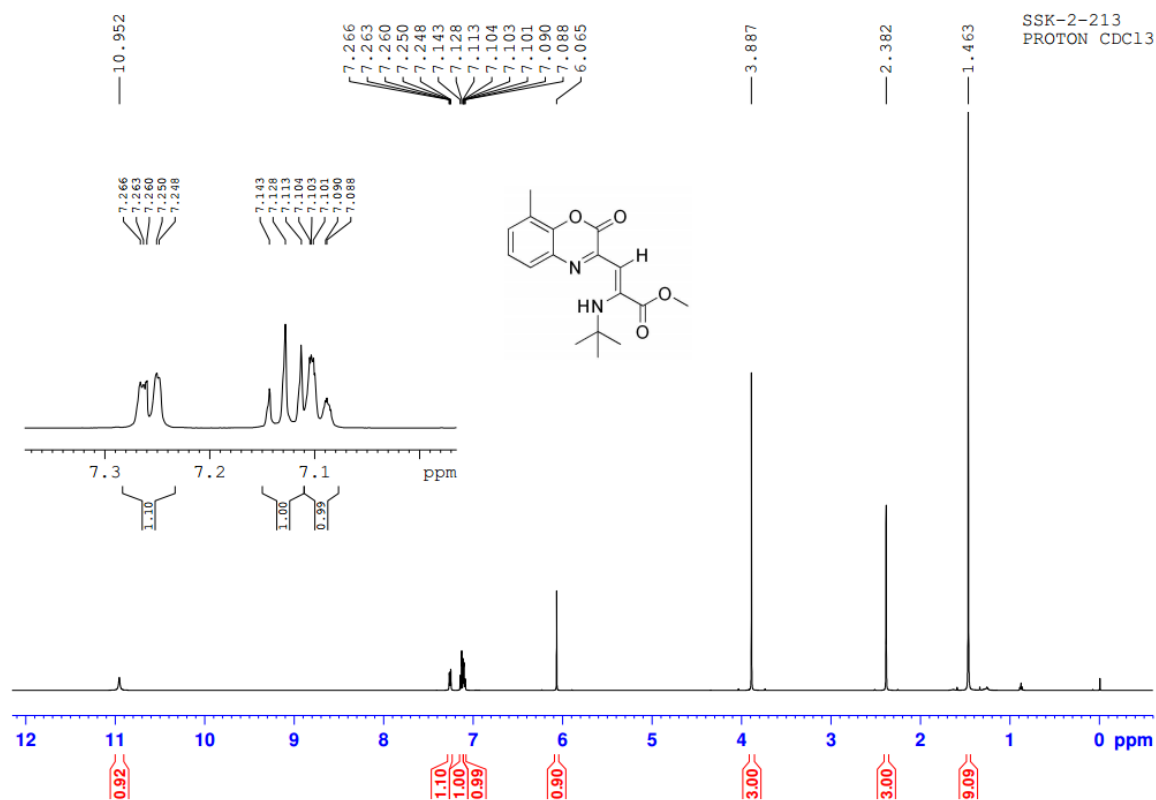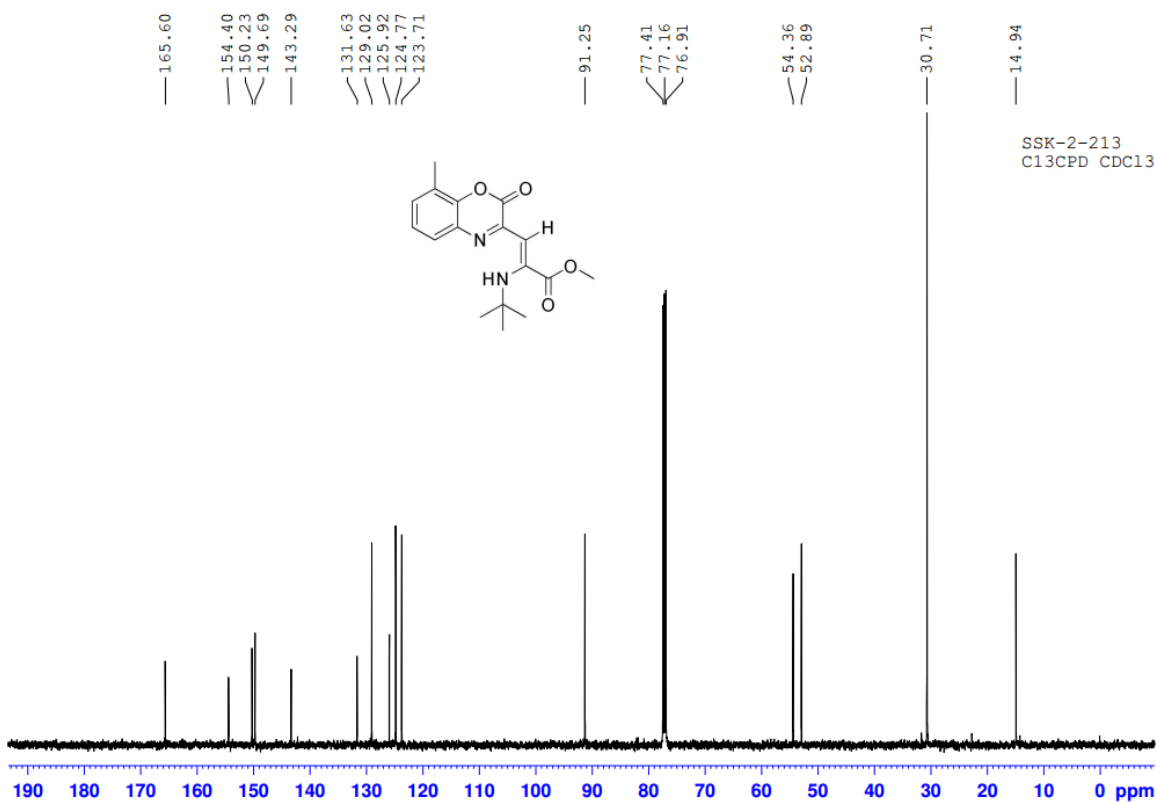

# Compound 3m

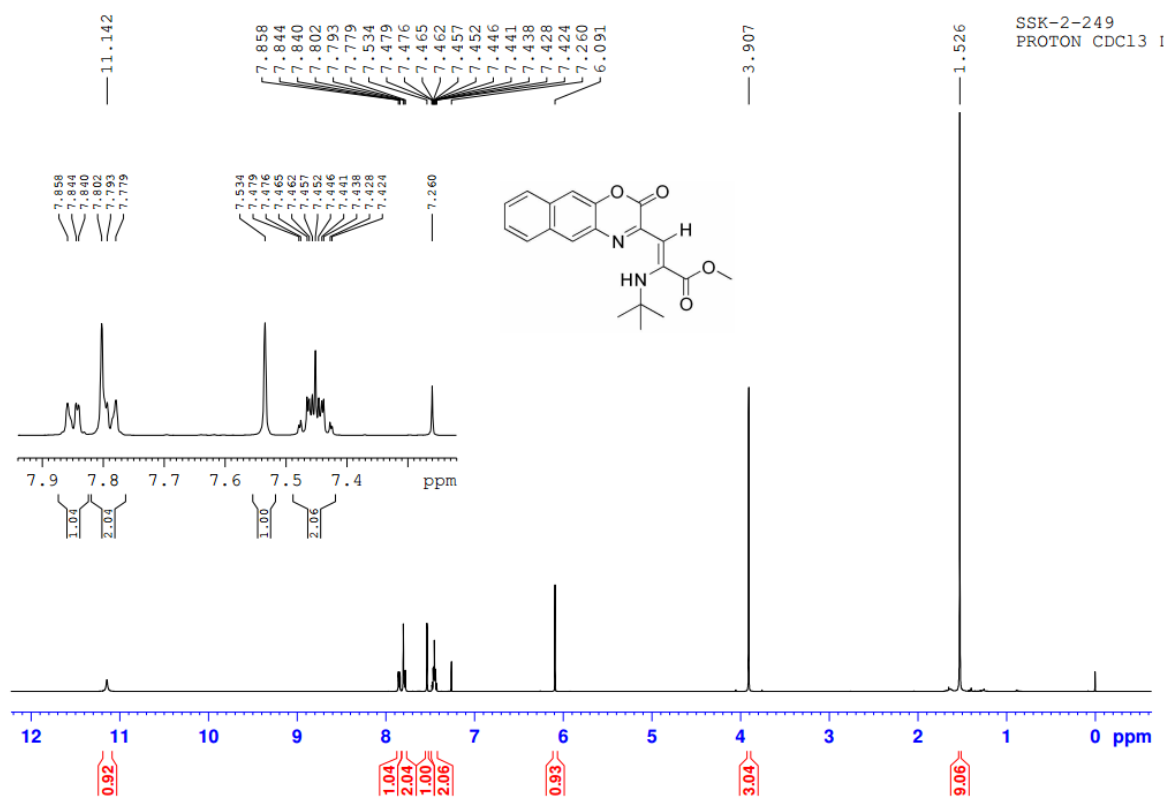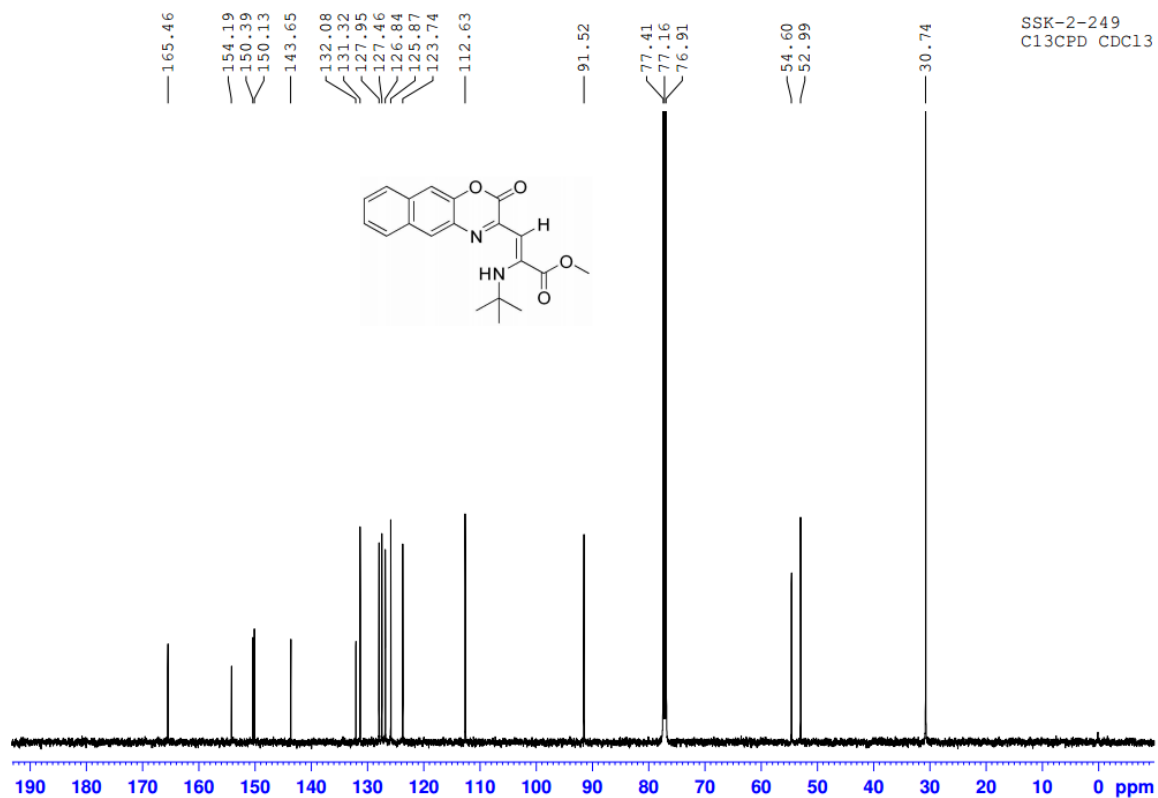

### Compound 3n

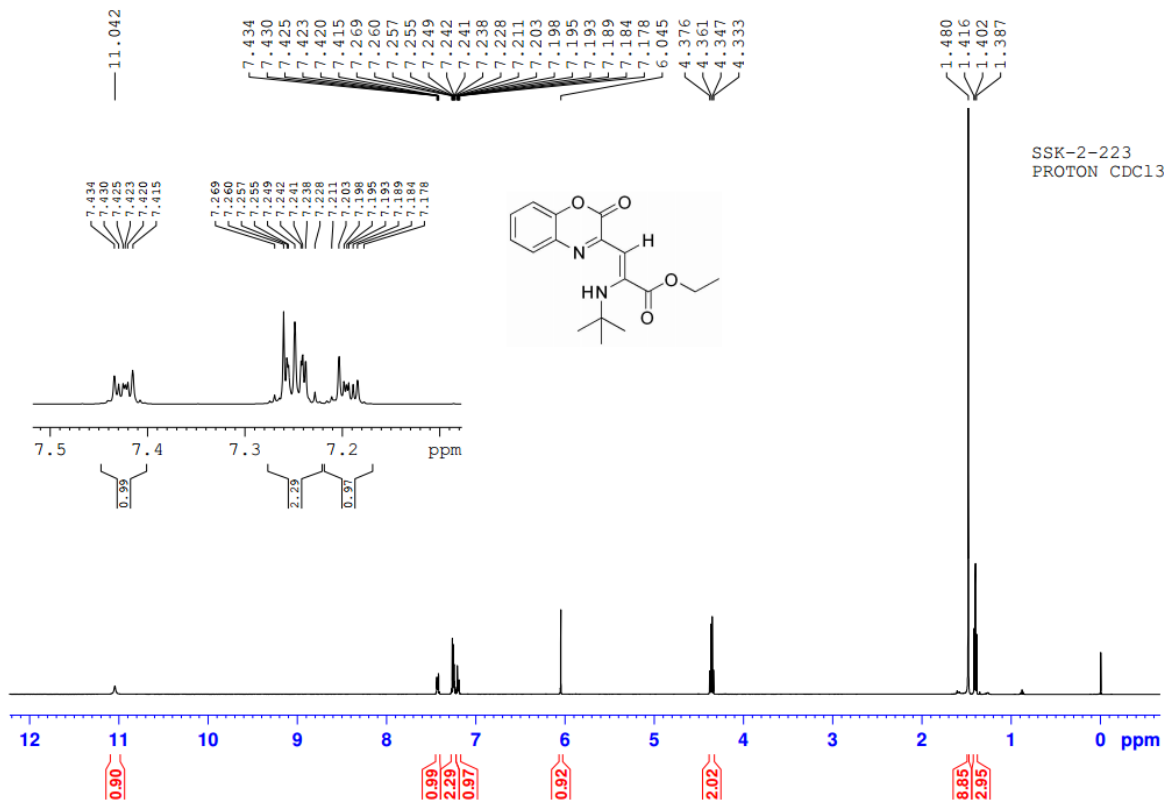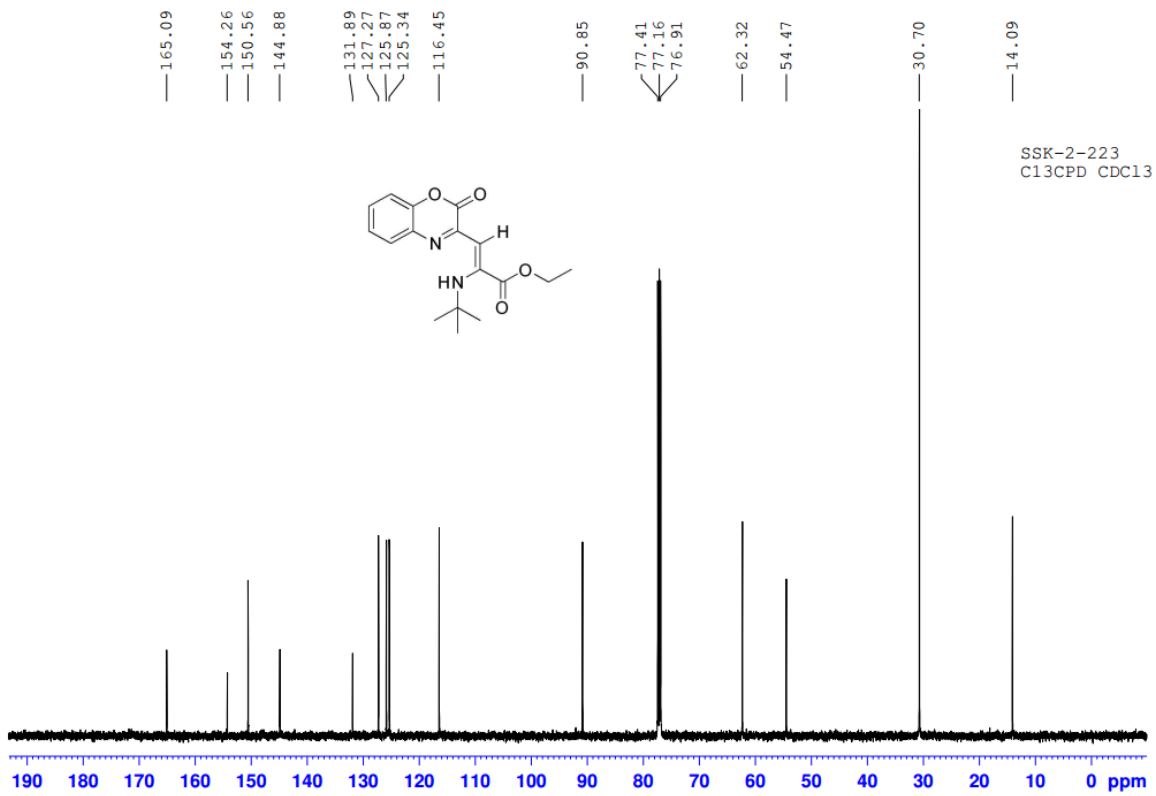

# Compound 3o

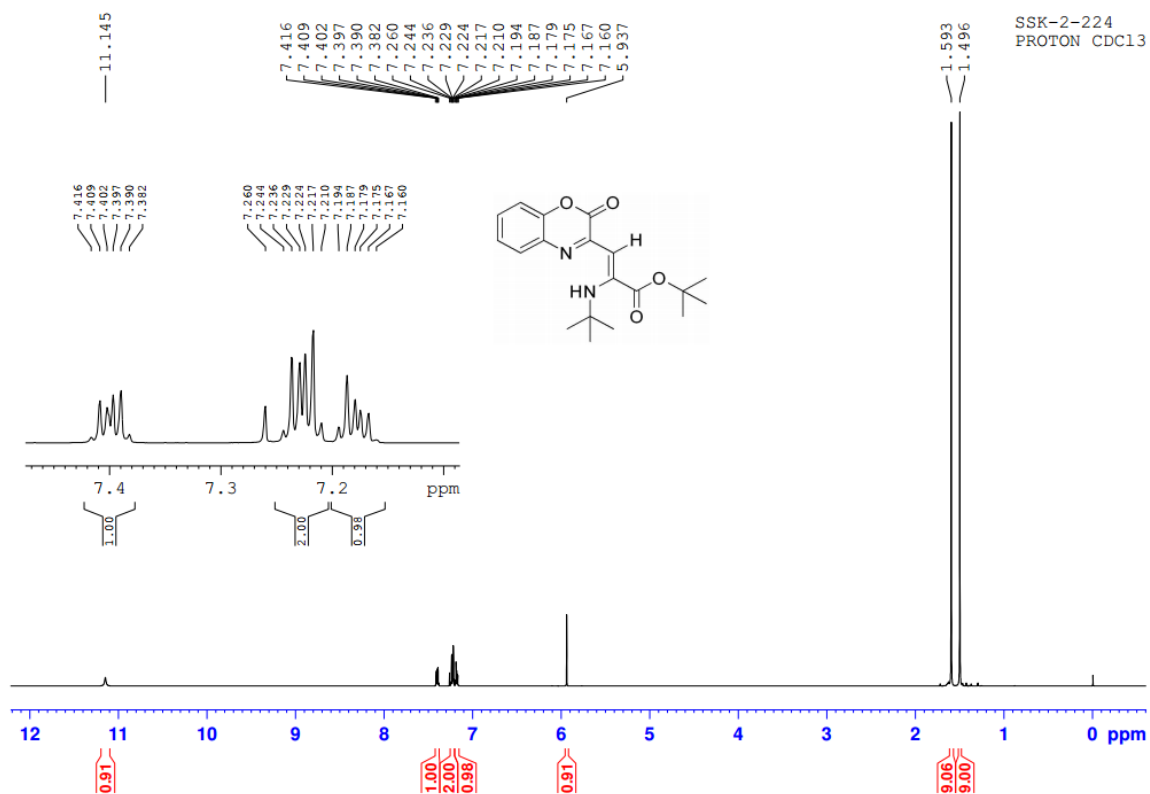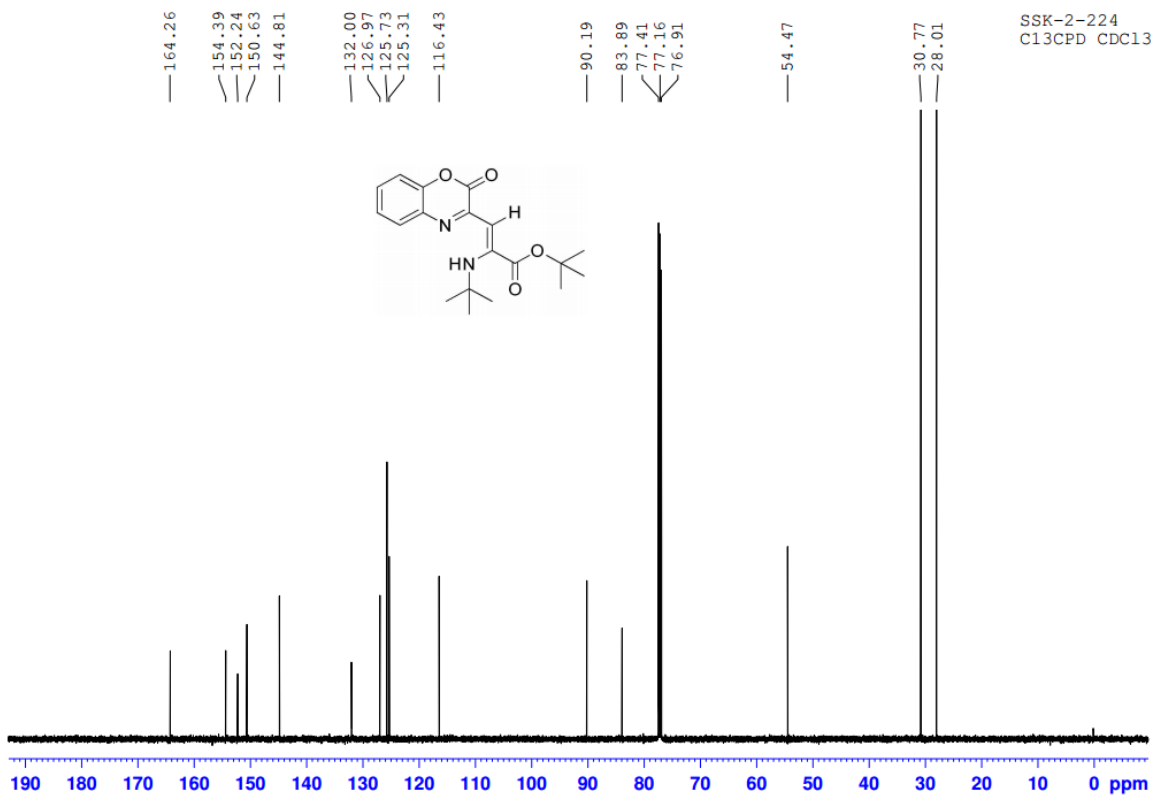



### Compound 4a

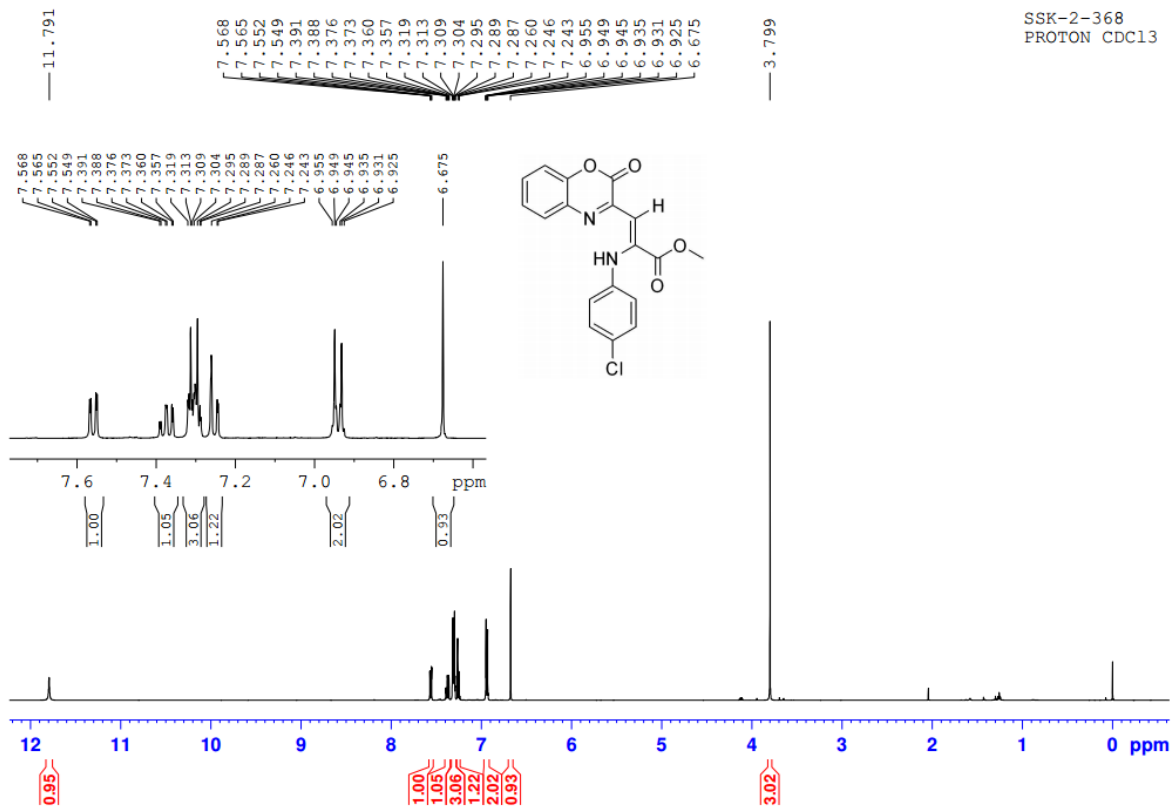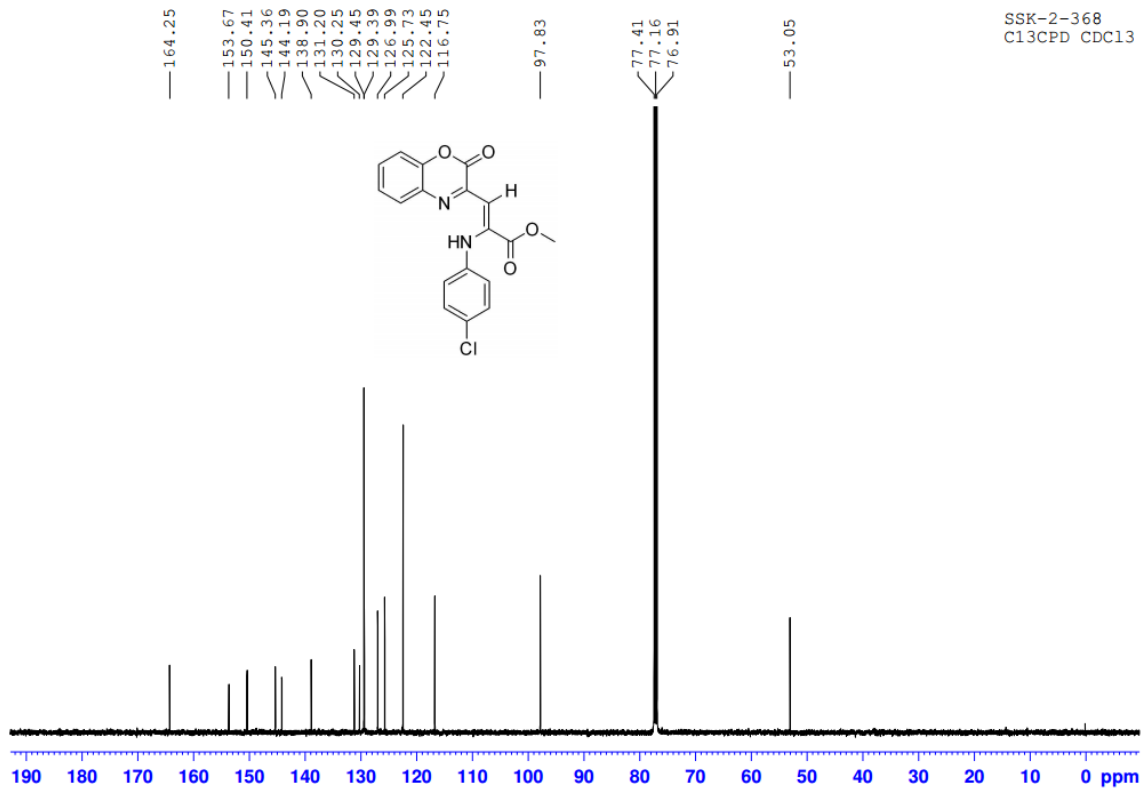

# Compound 4b

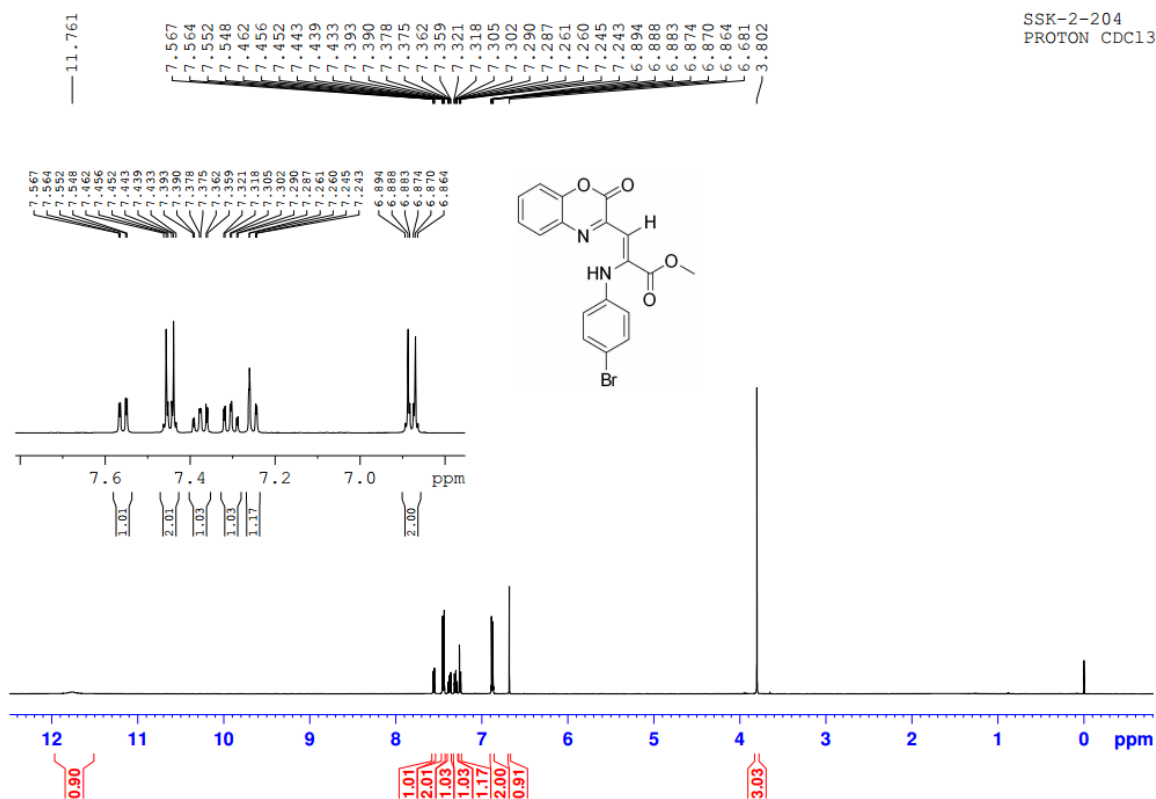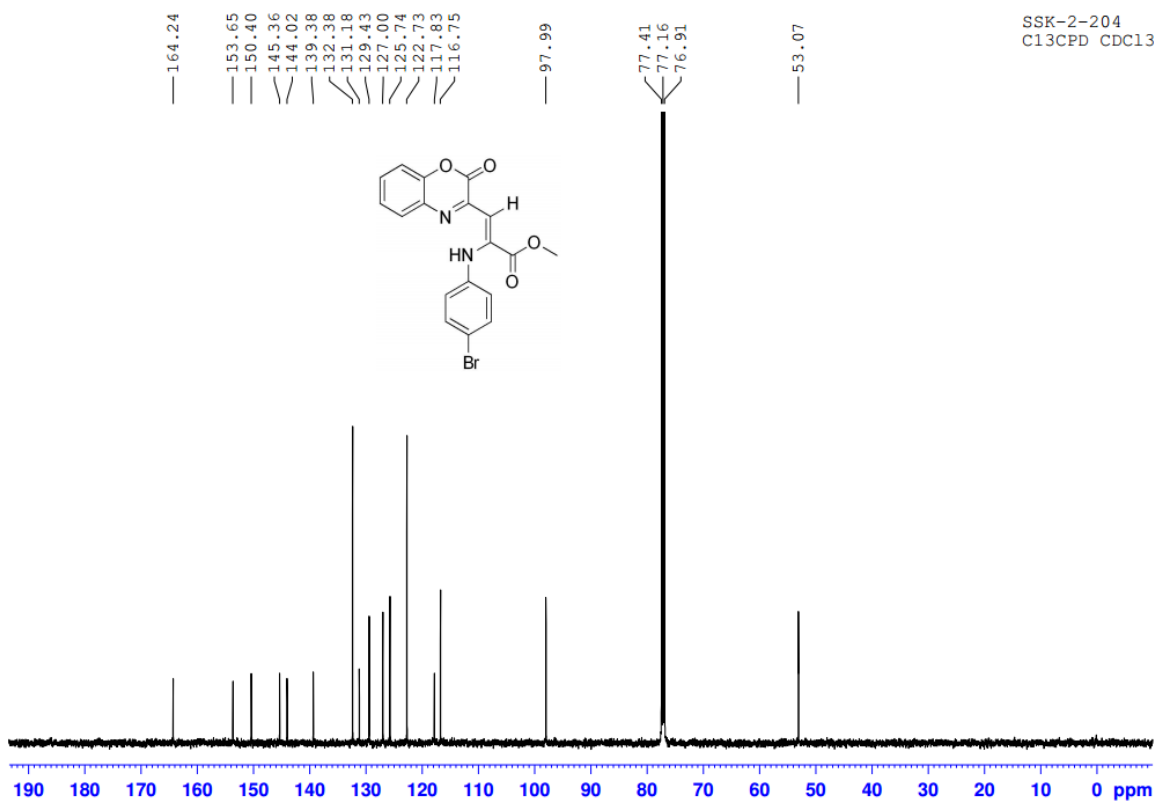

# Compound 4c

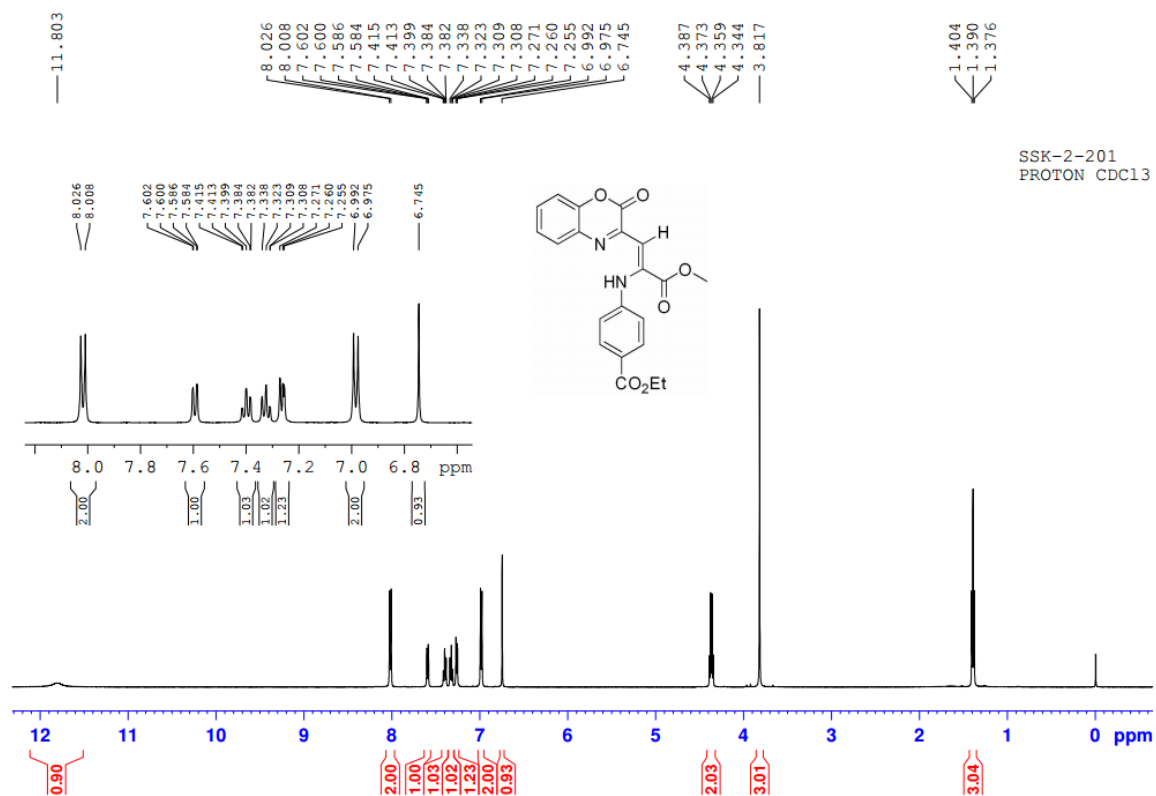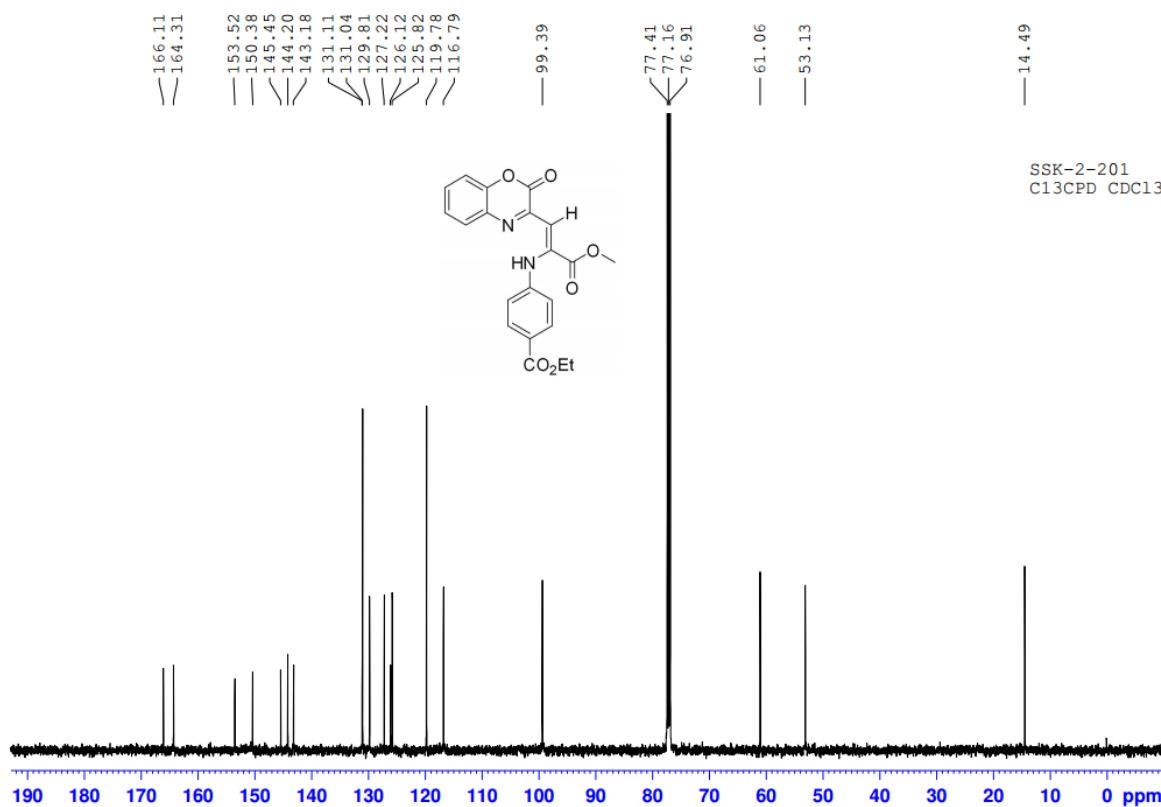

# Compound 4d

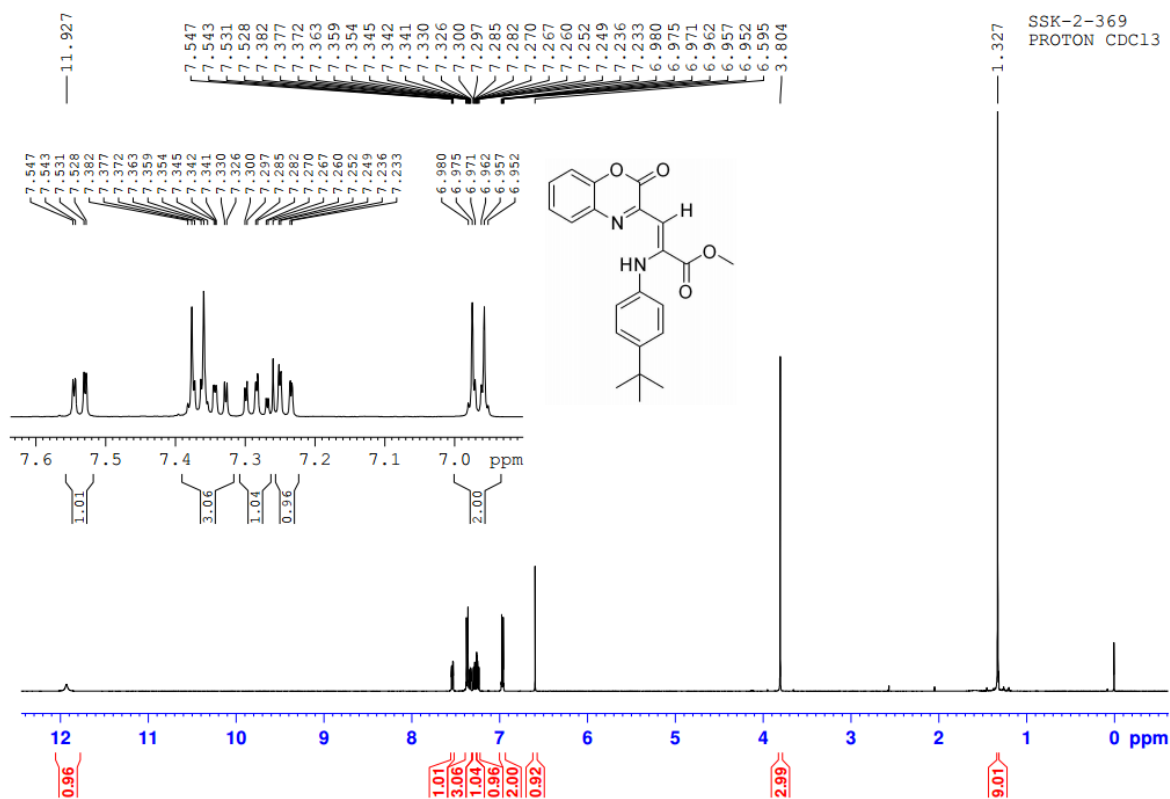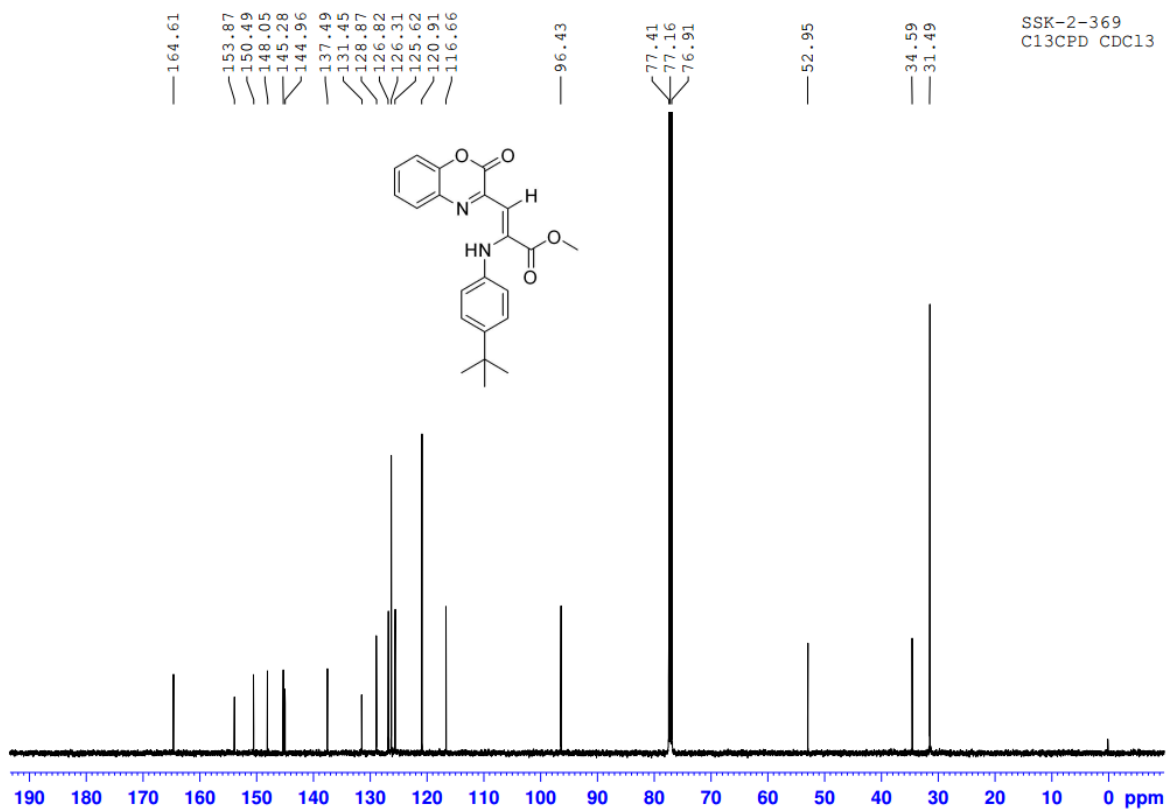

# Compound 4e

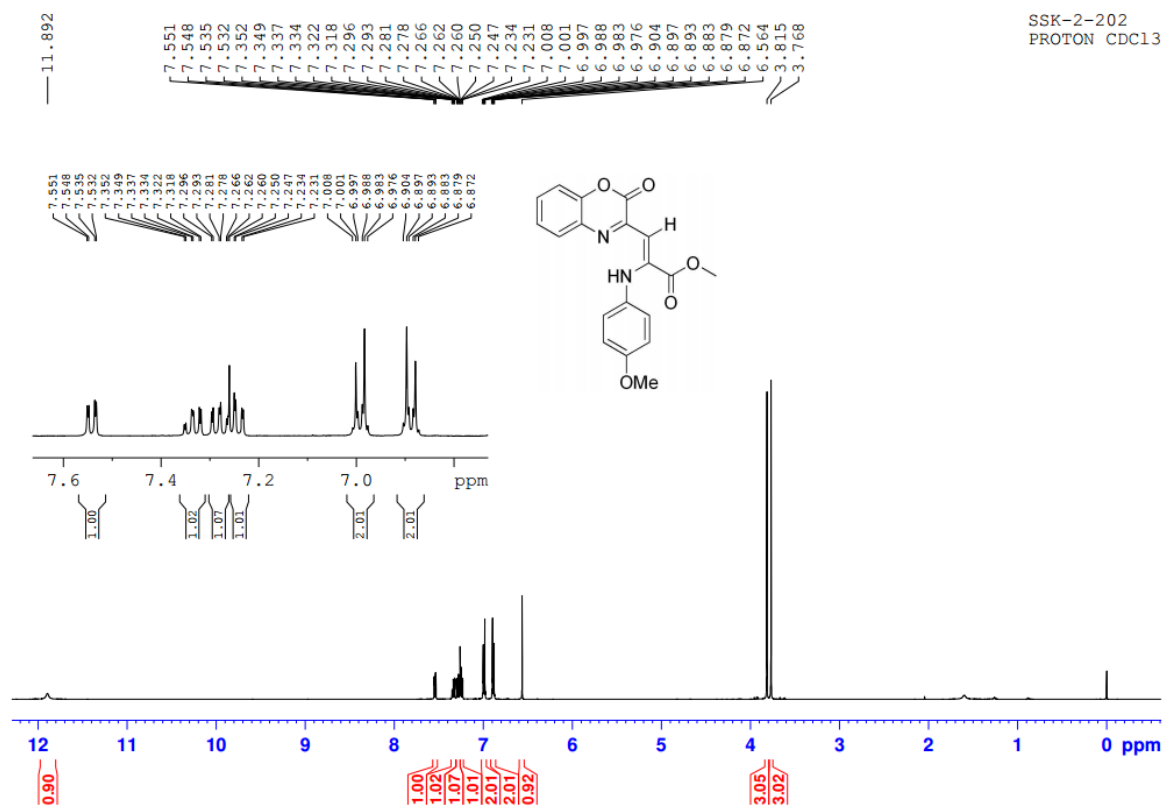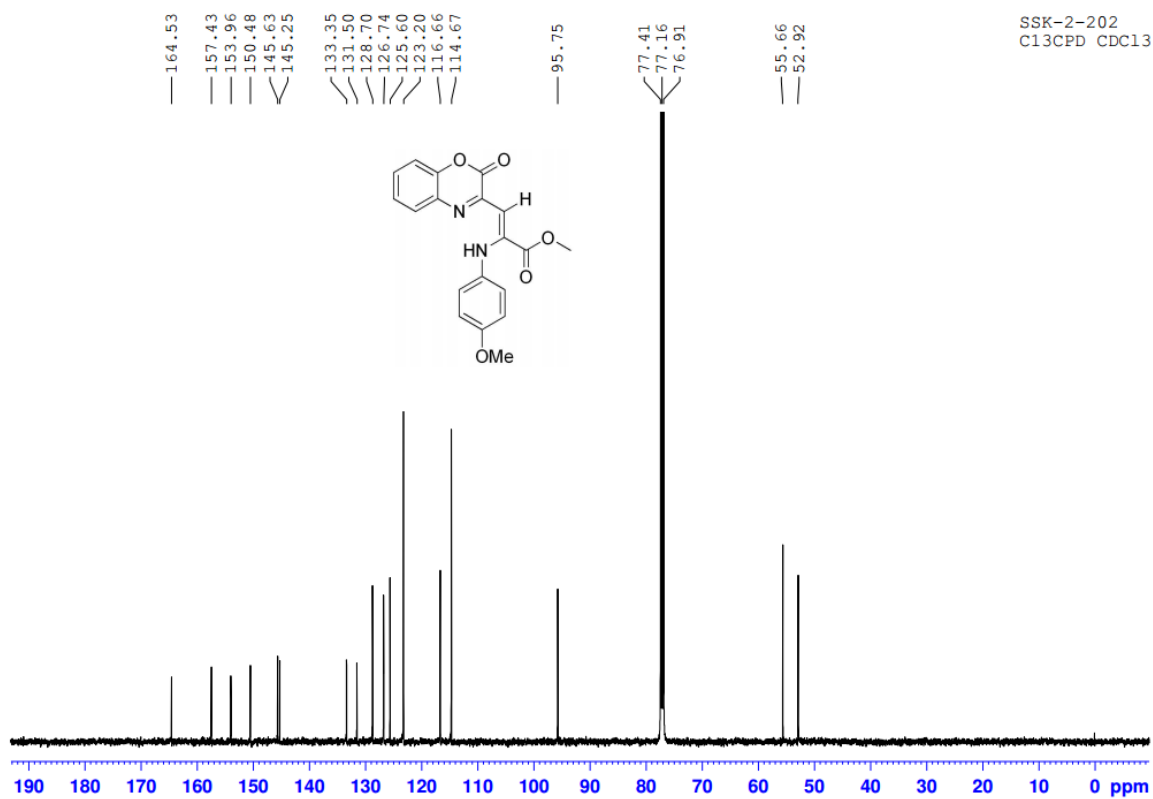

# Compound 4f

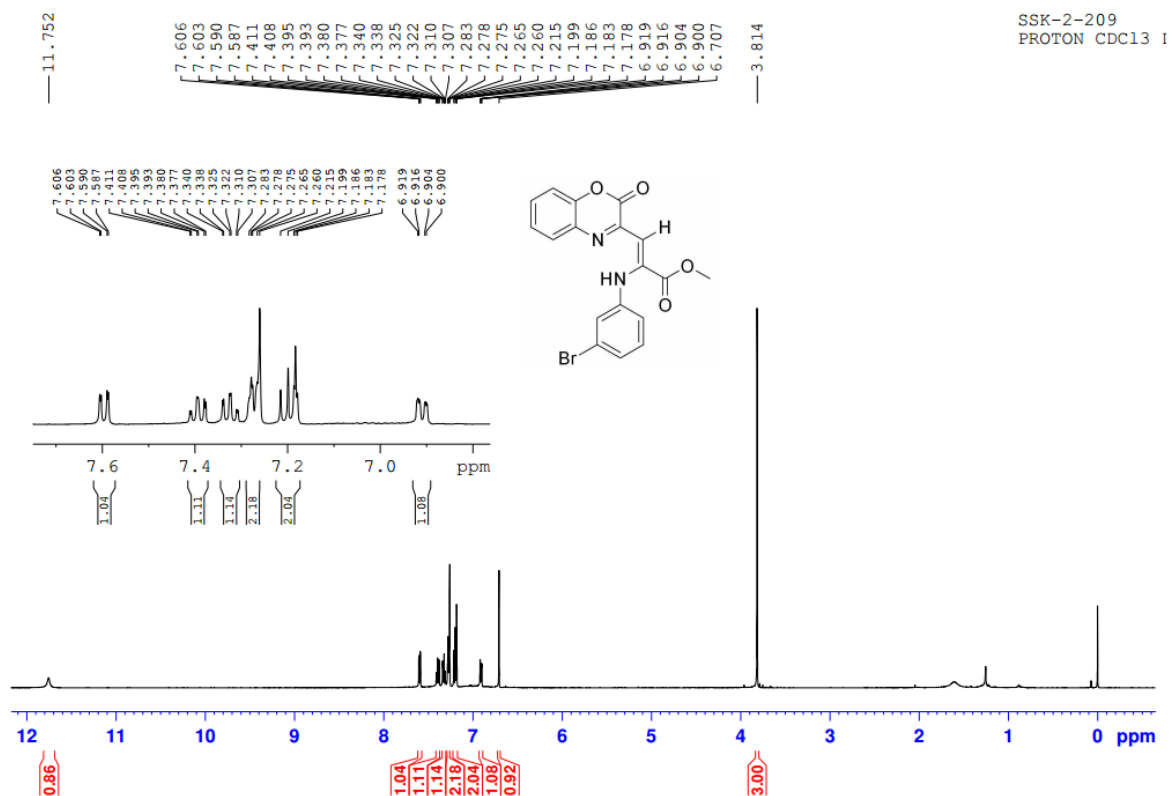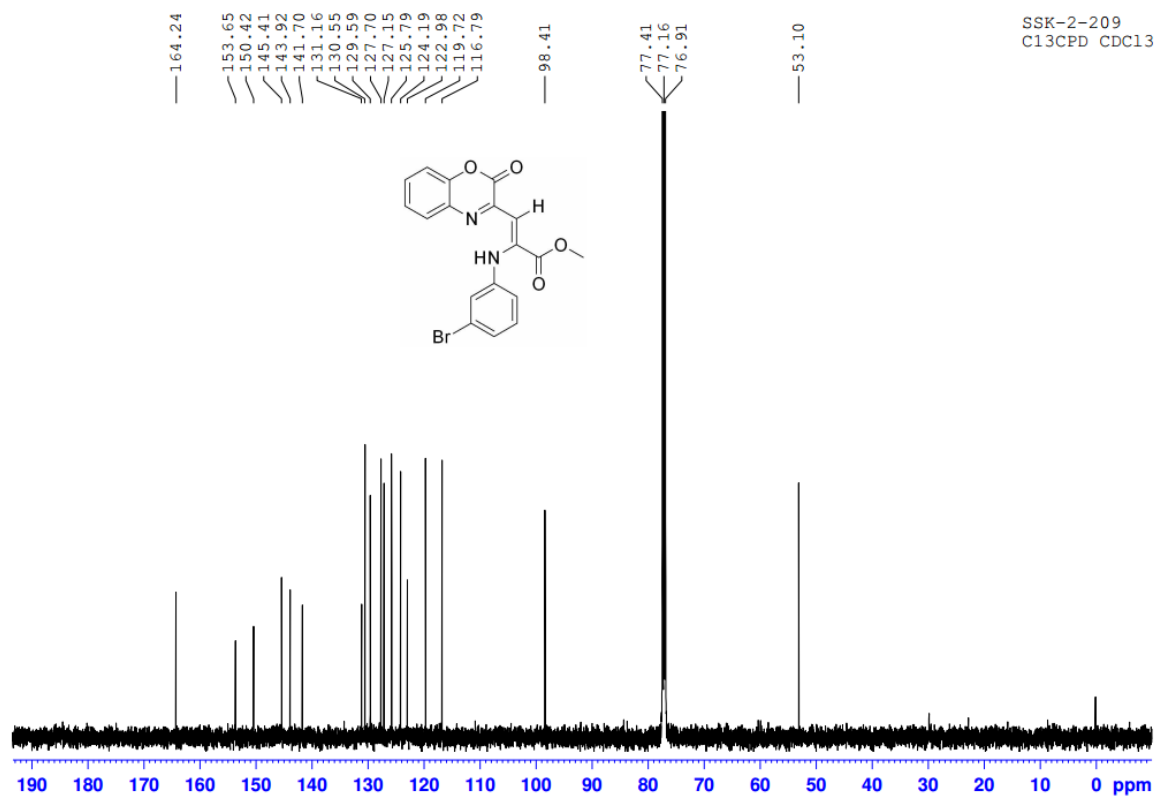

# Compound 4g

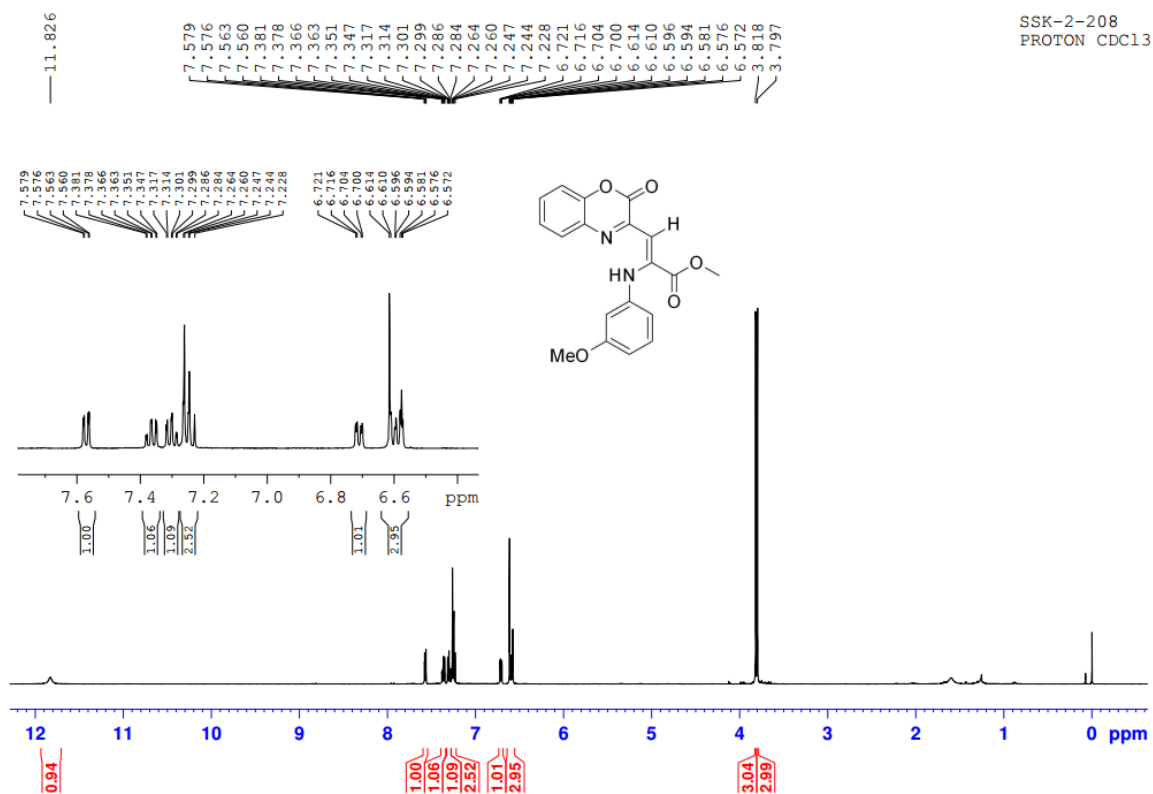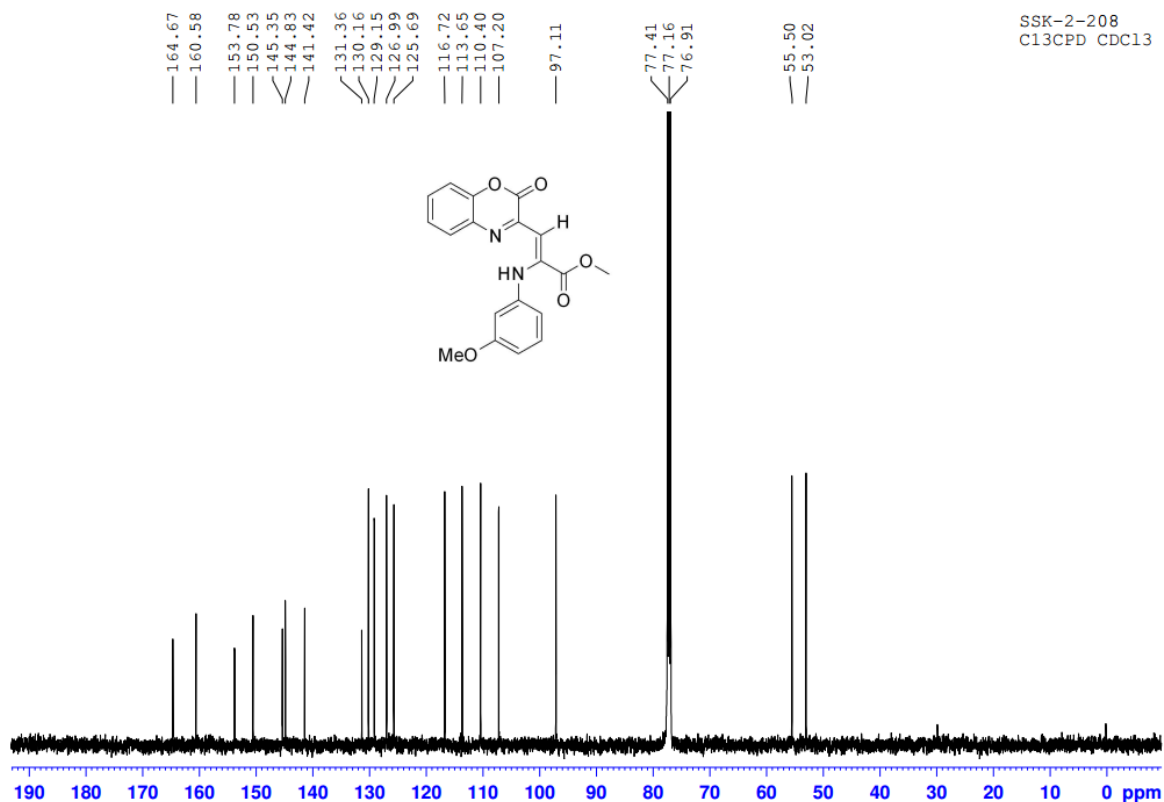

# Compound 4h

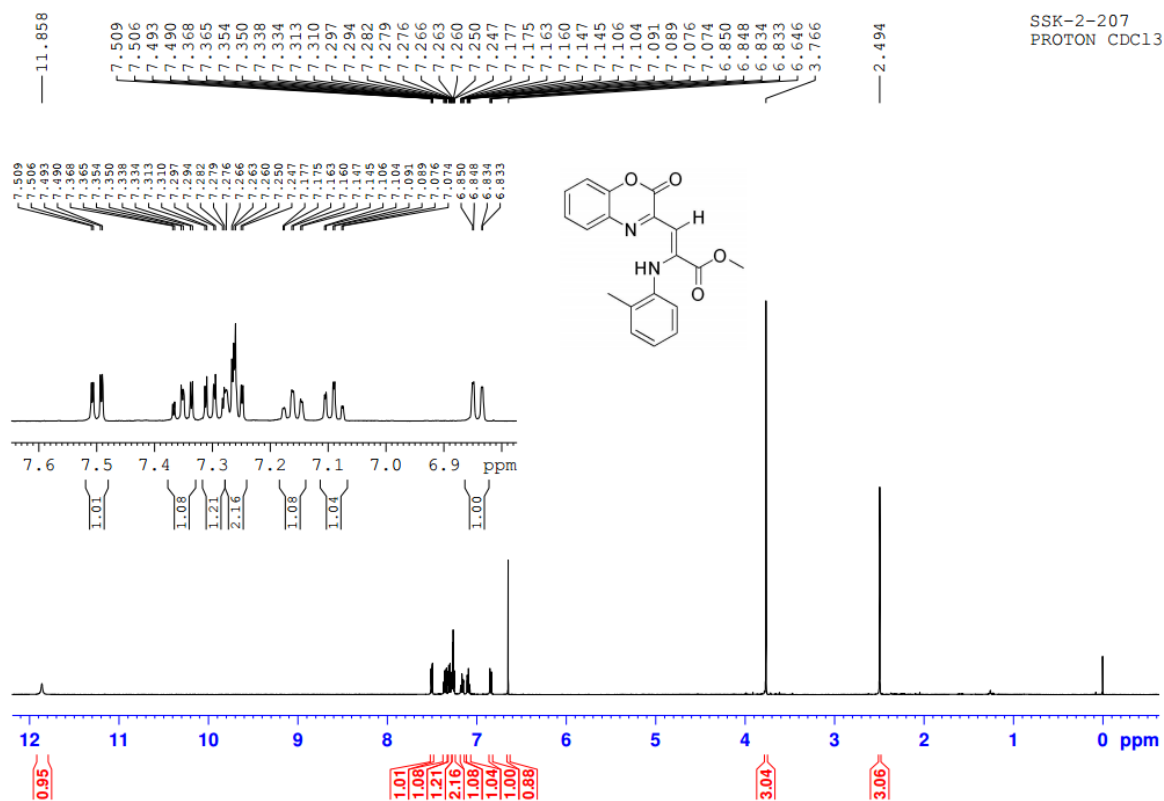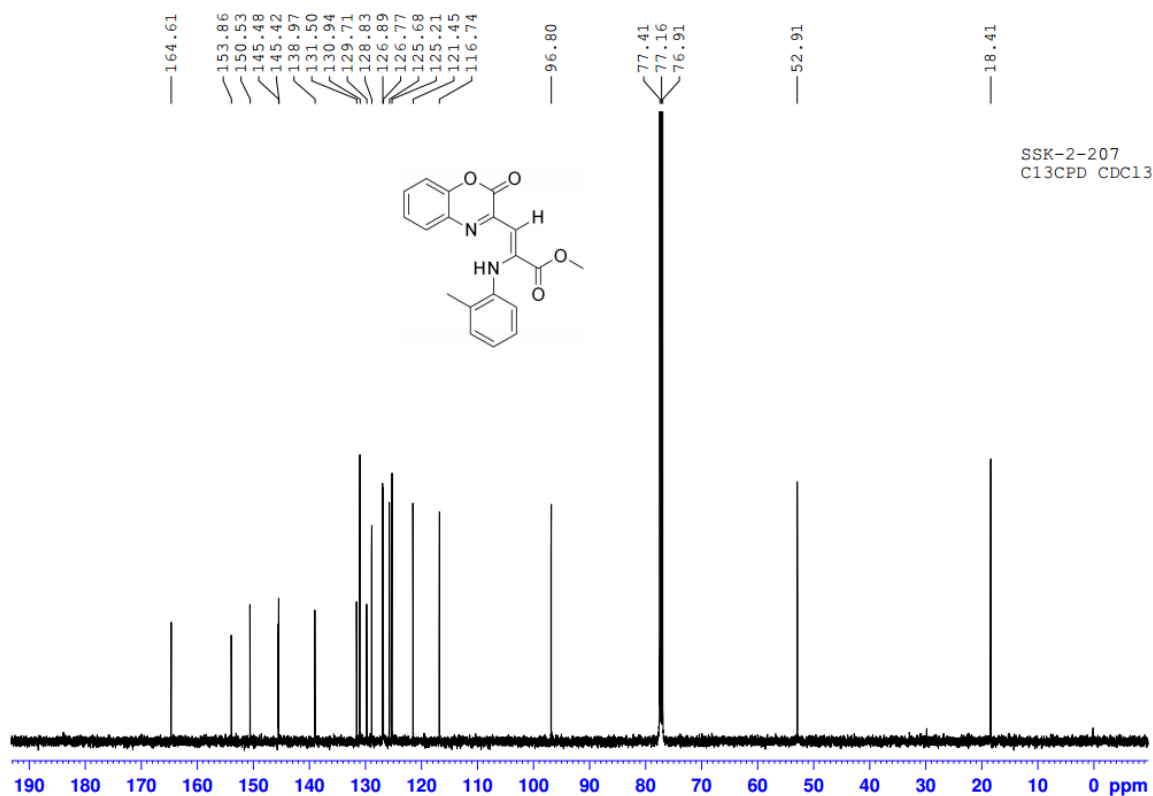



# Compound 4i

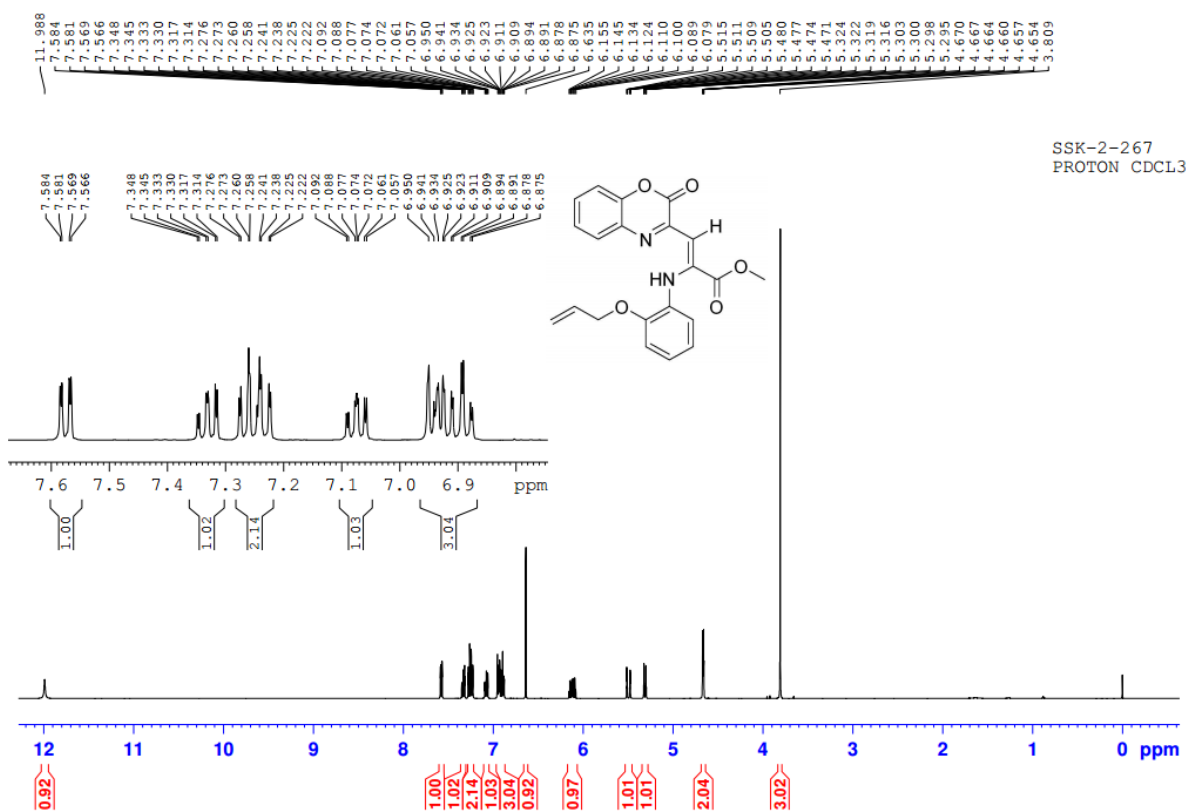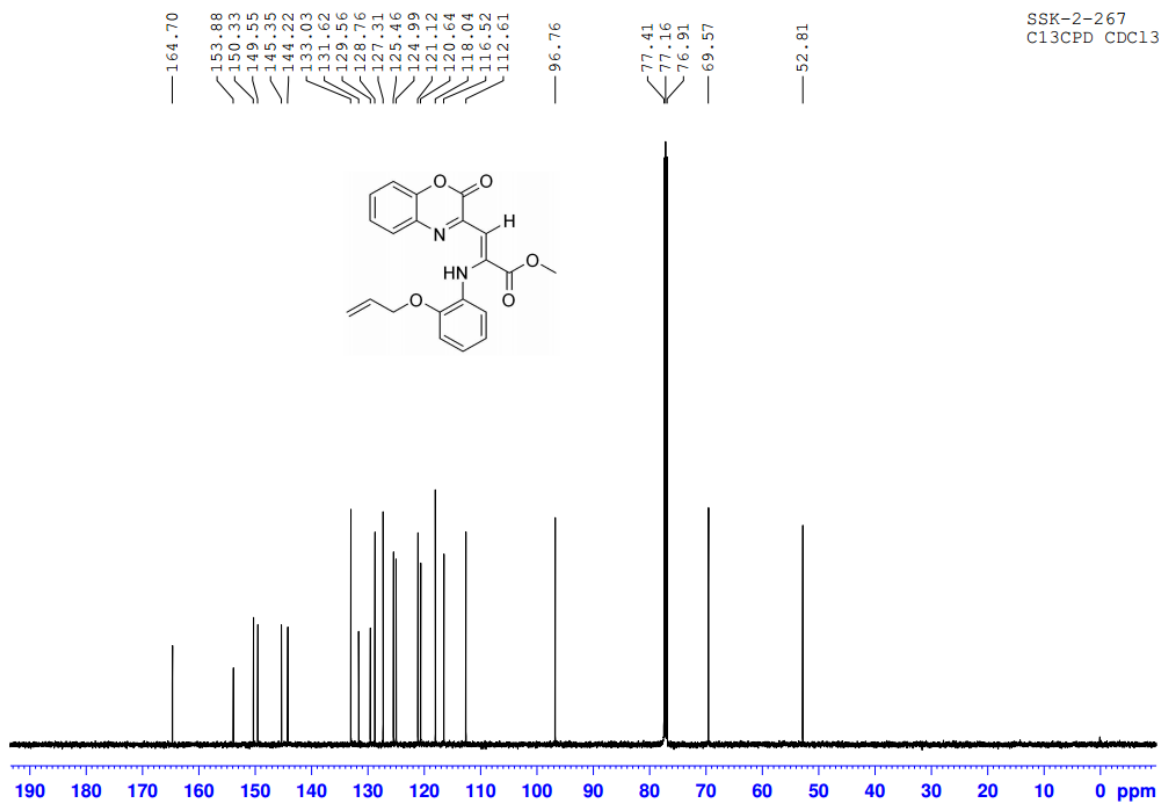

### Compound 4j

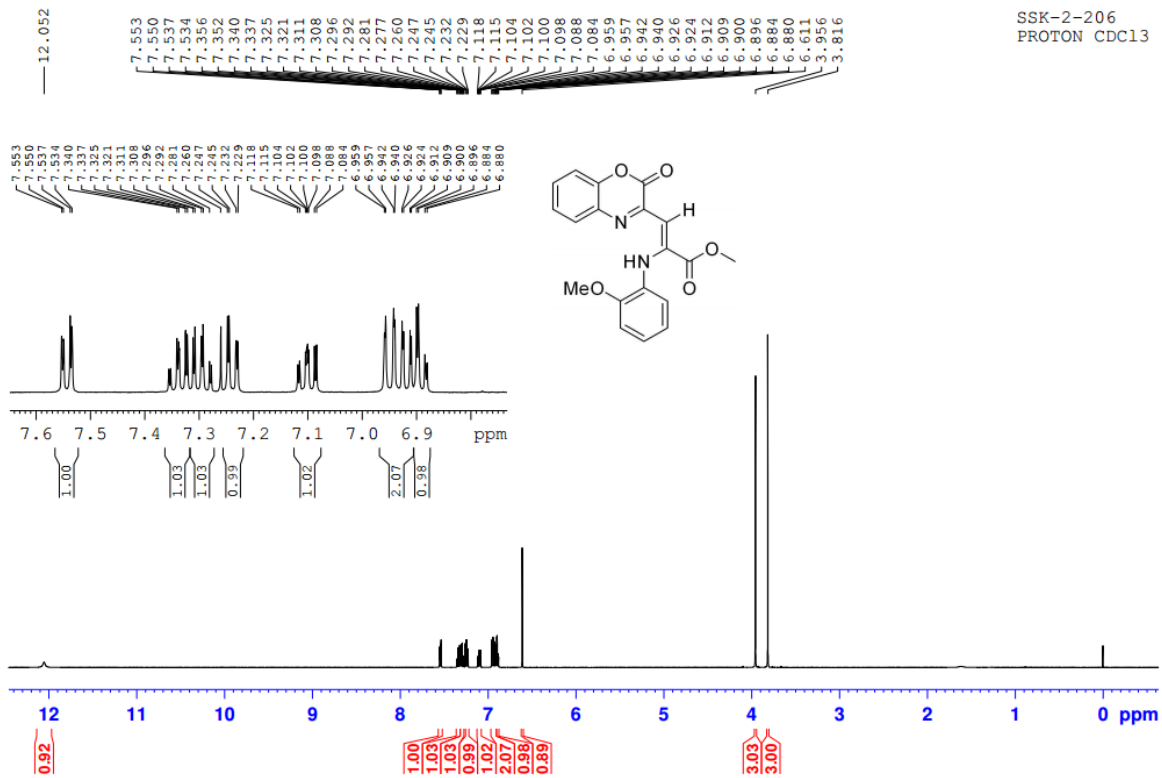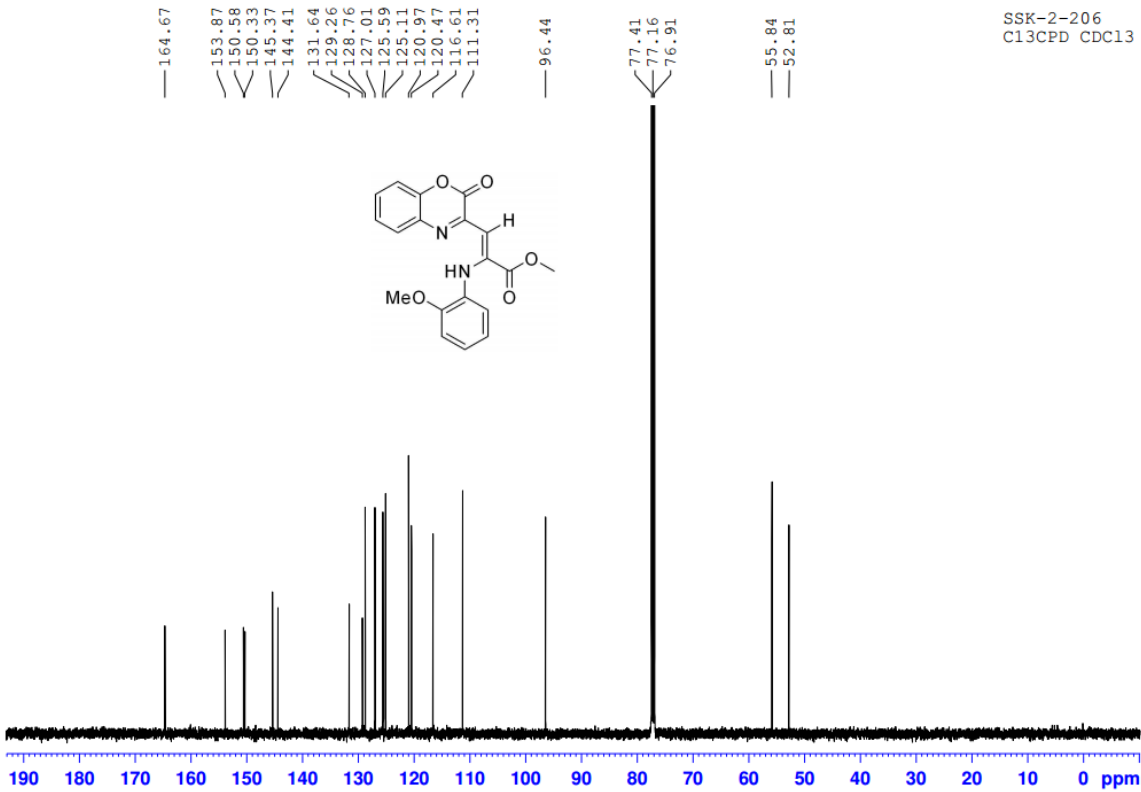

# Compound 4k

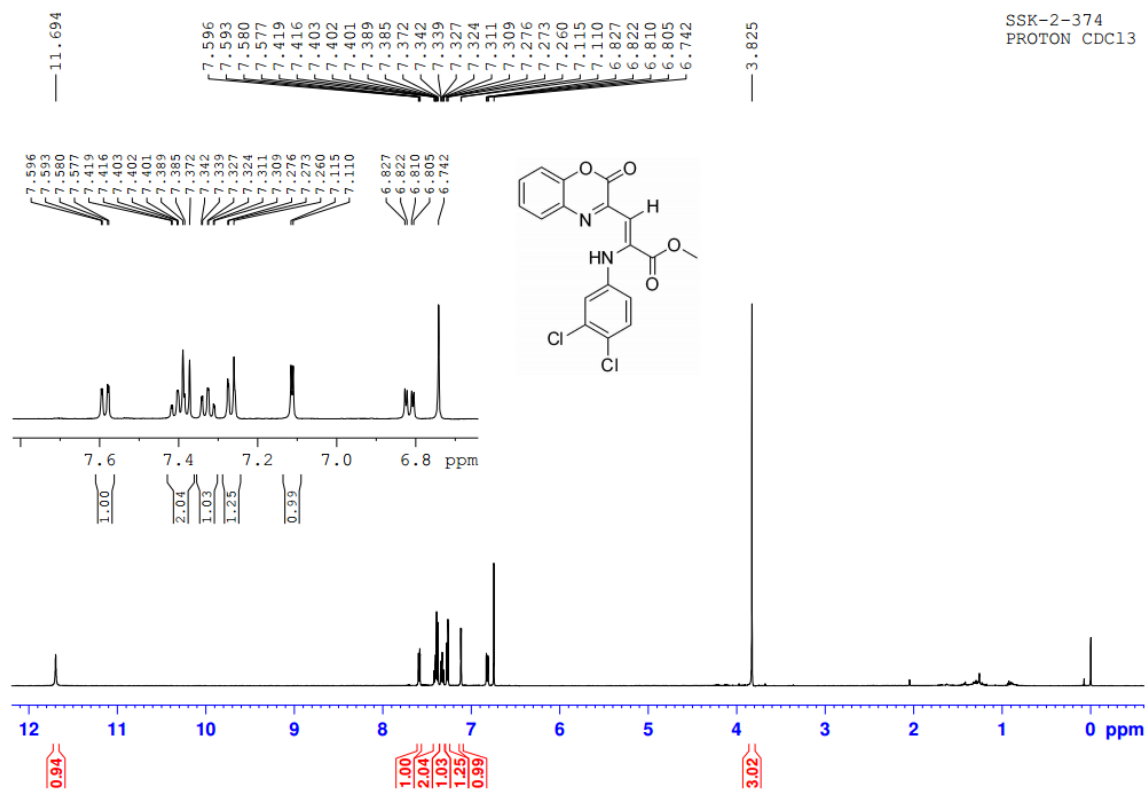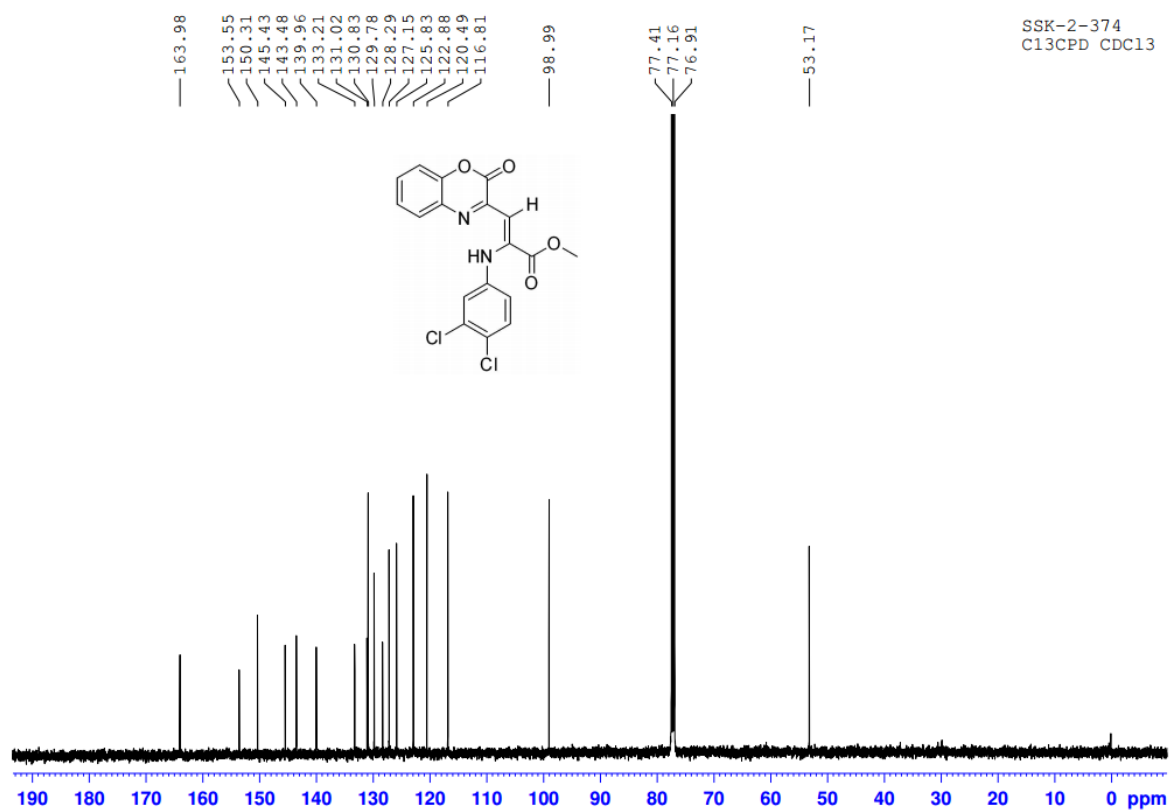

## Compound 4l

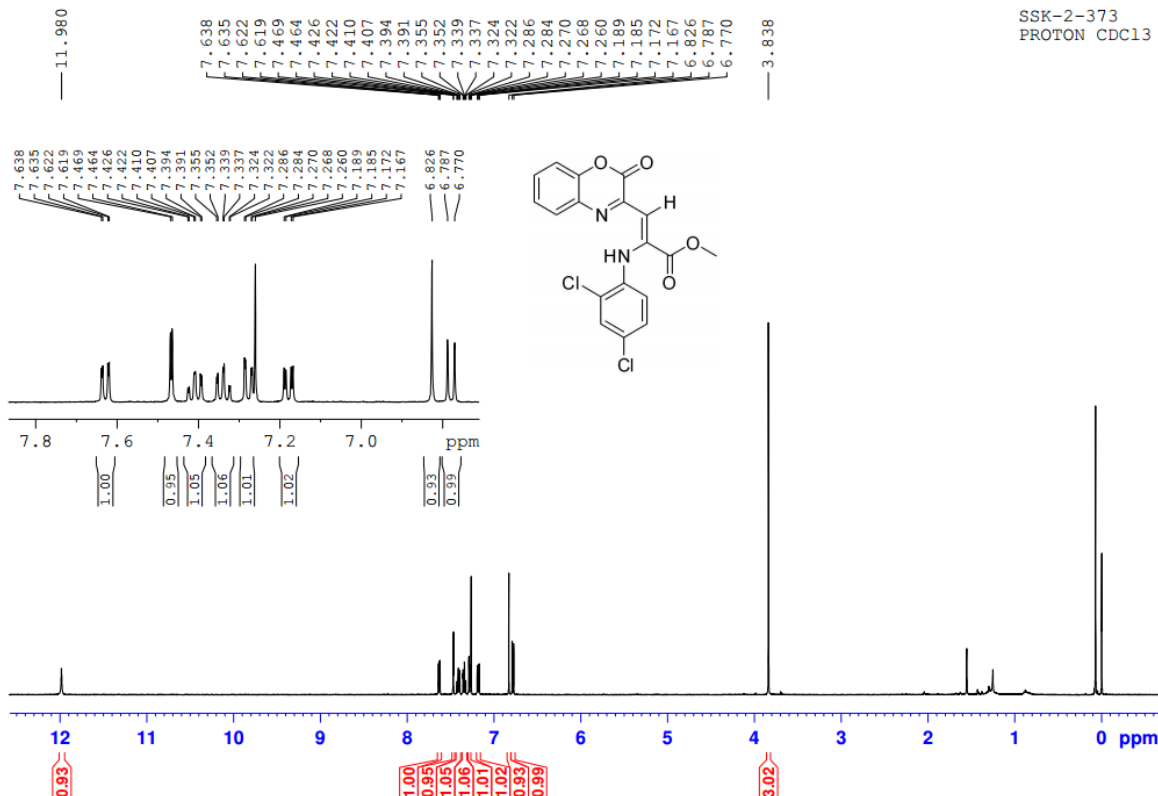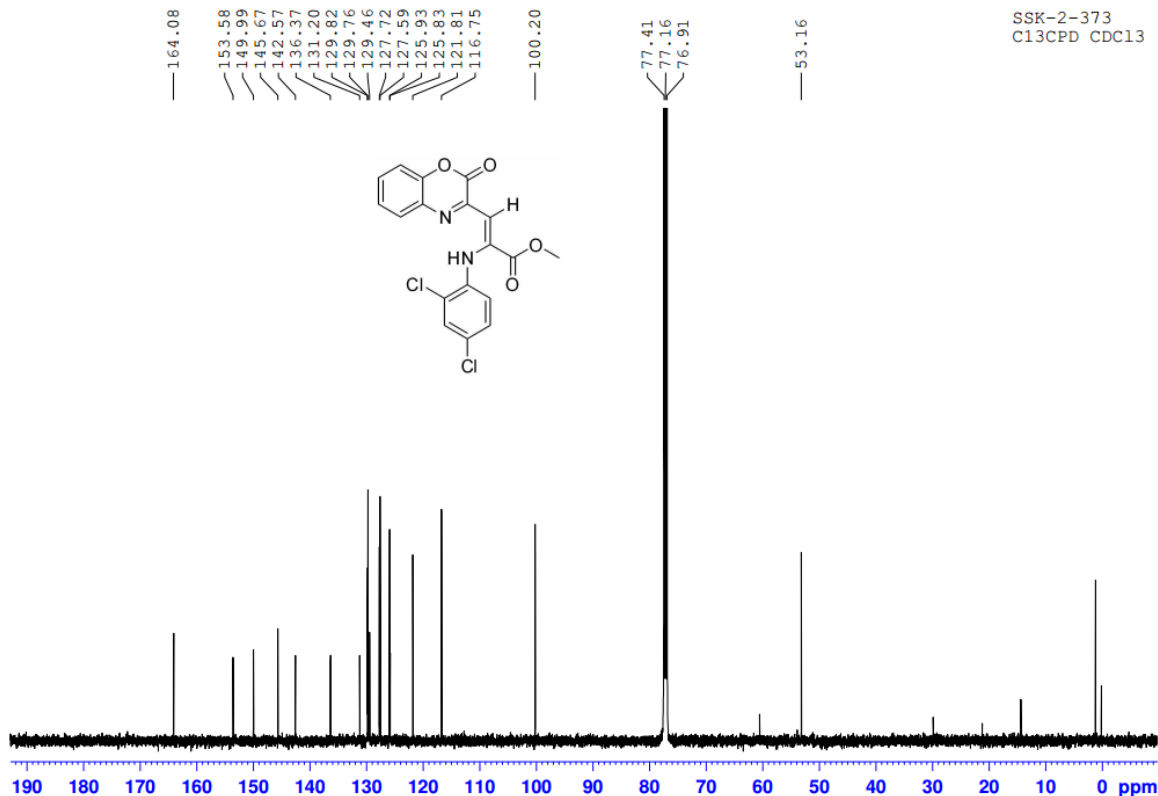

# Compound 4m

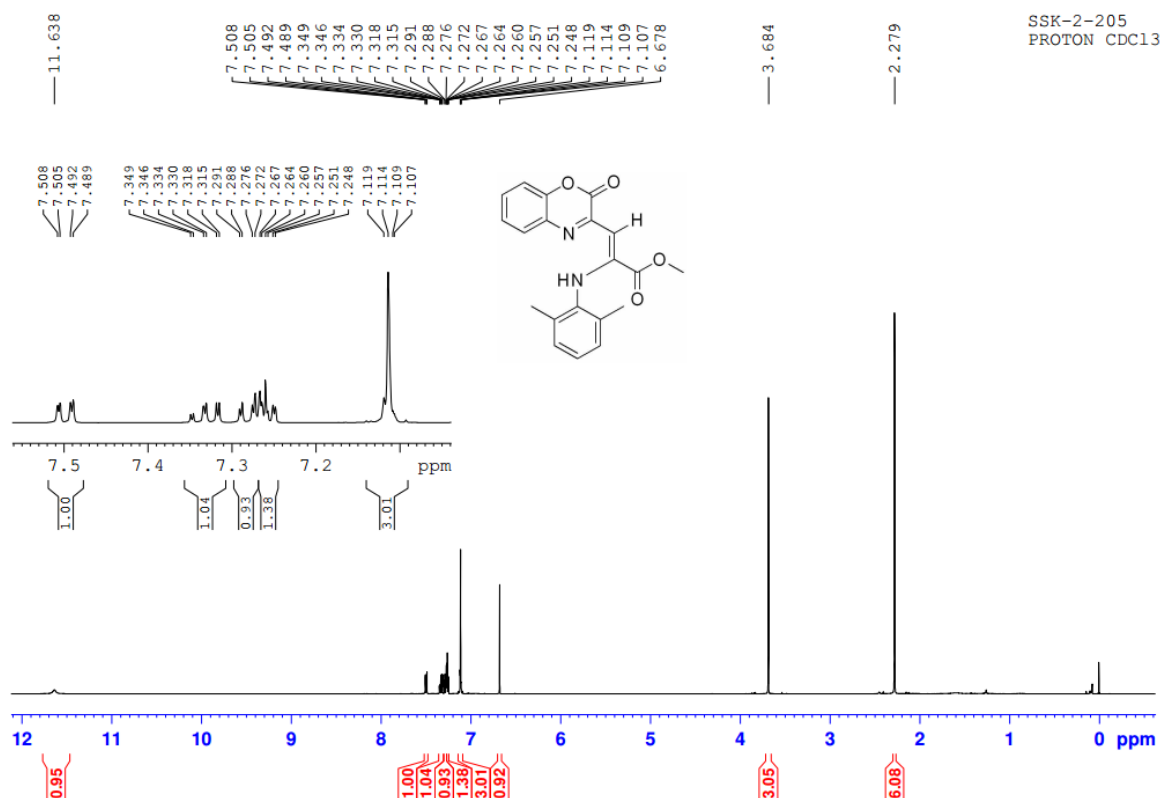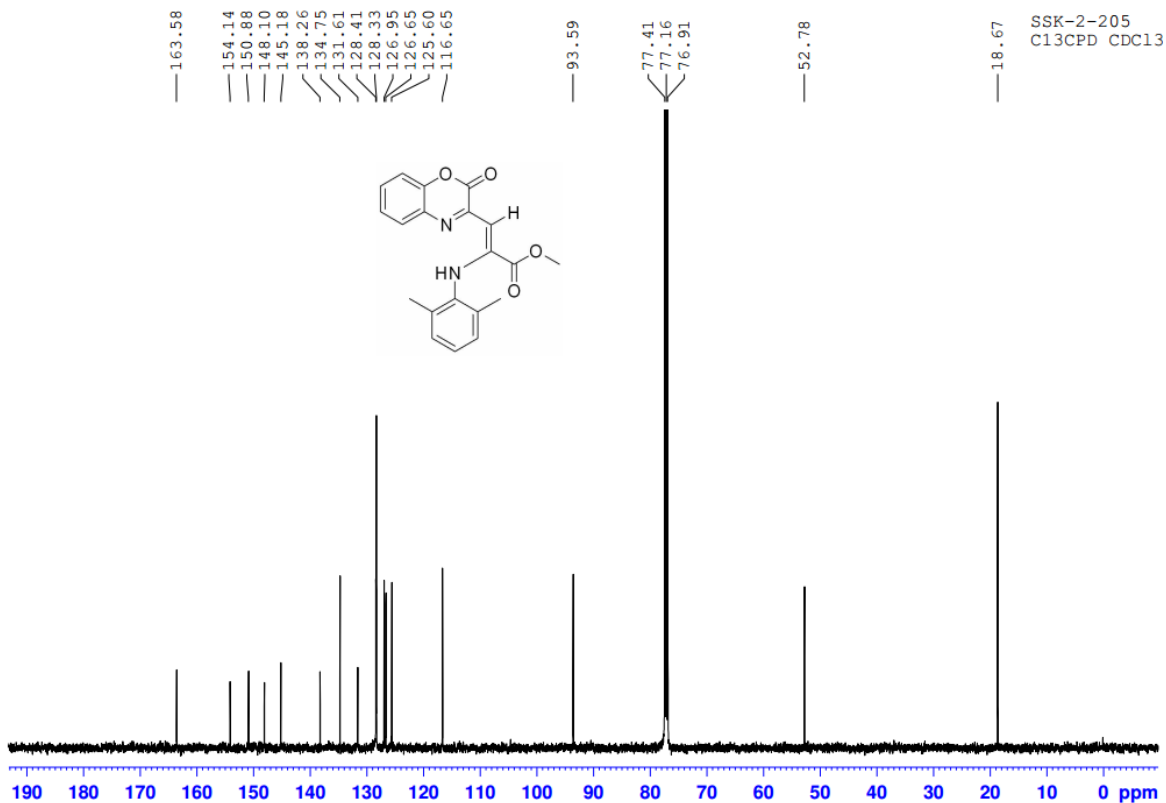

# Compound 4n

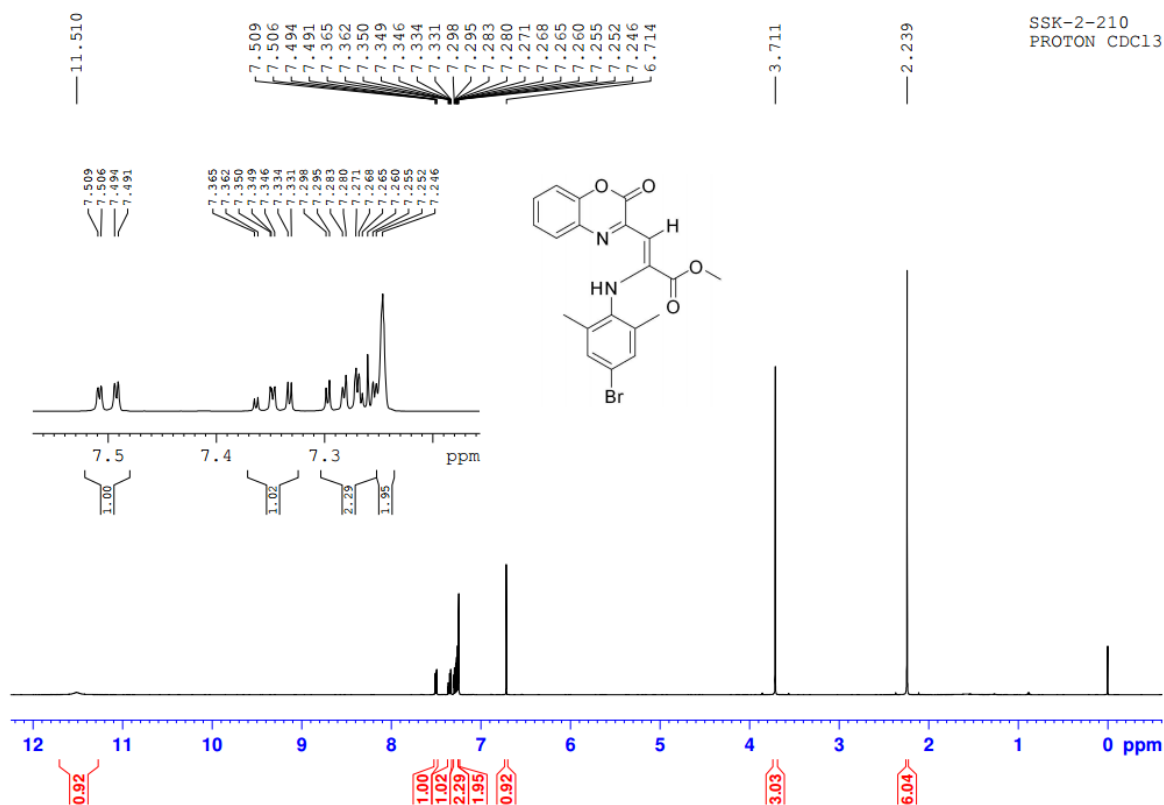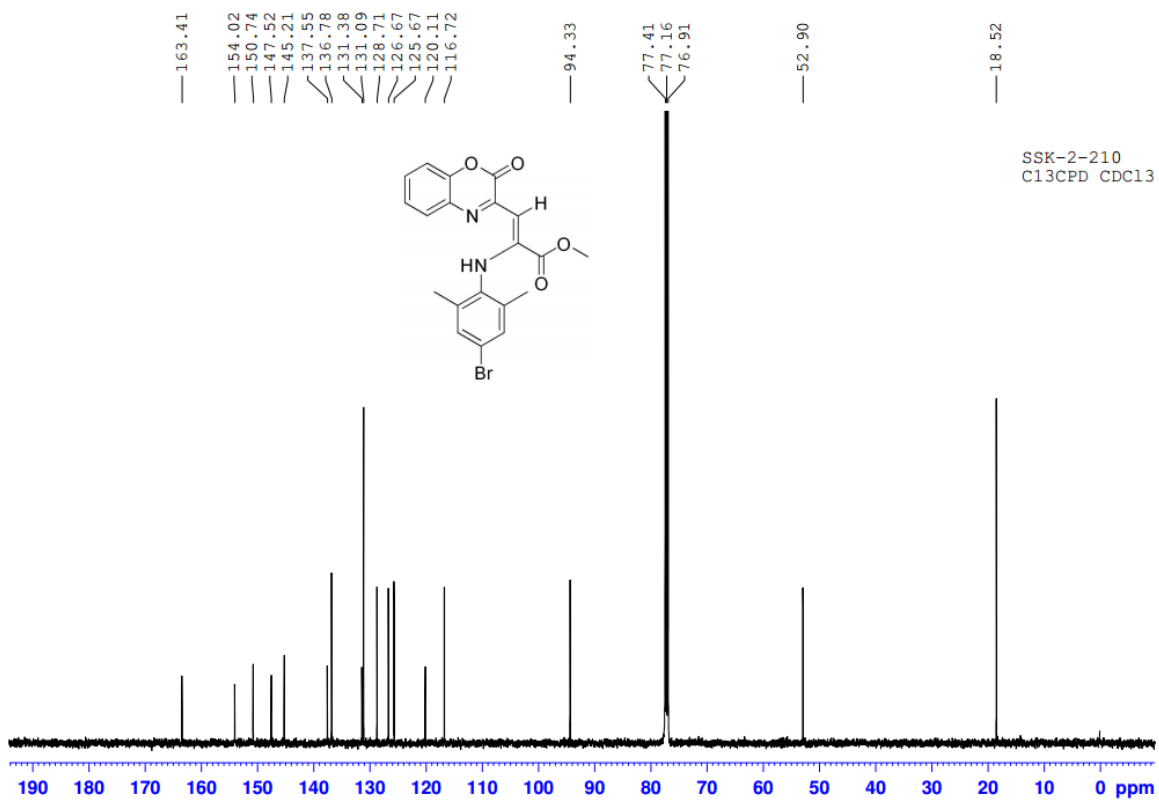

# Compound 4o

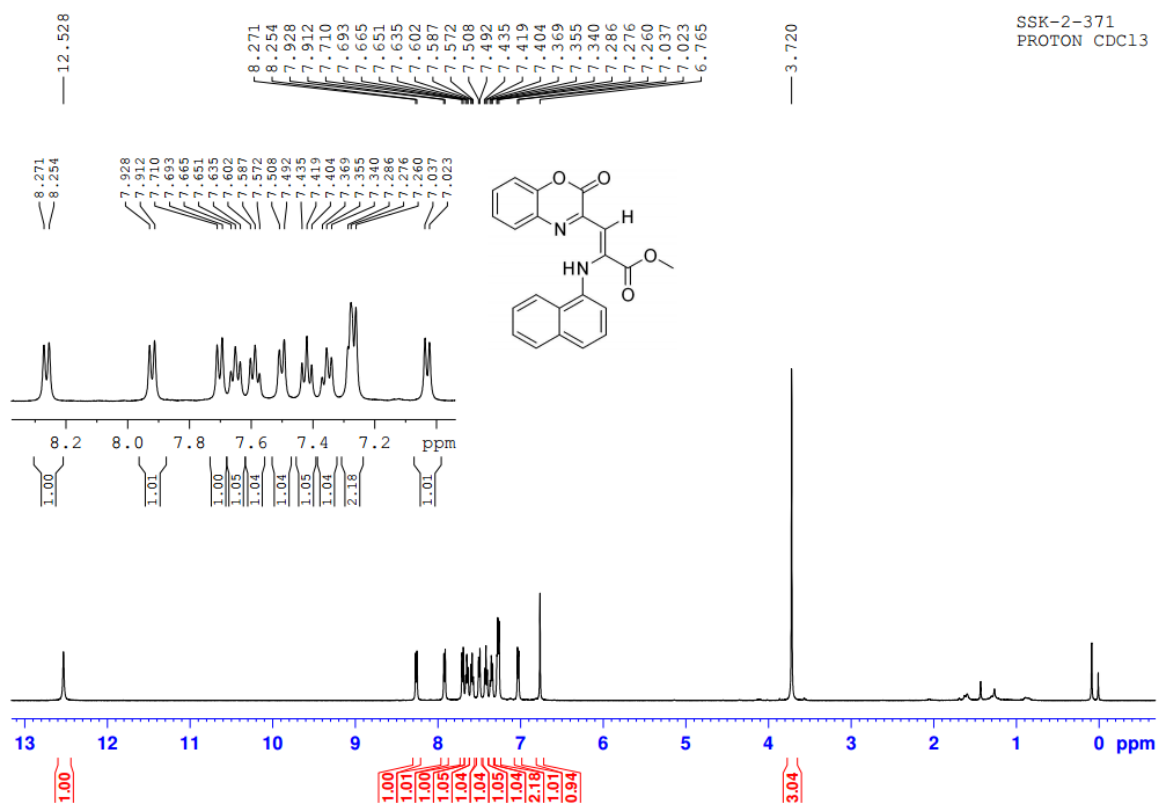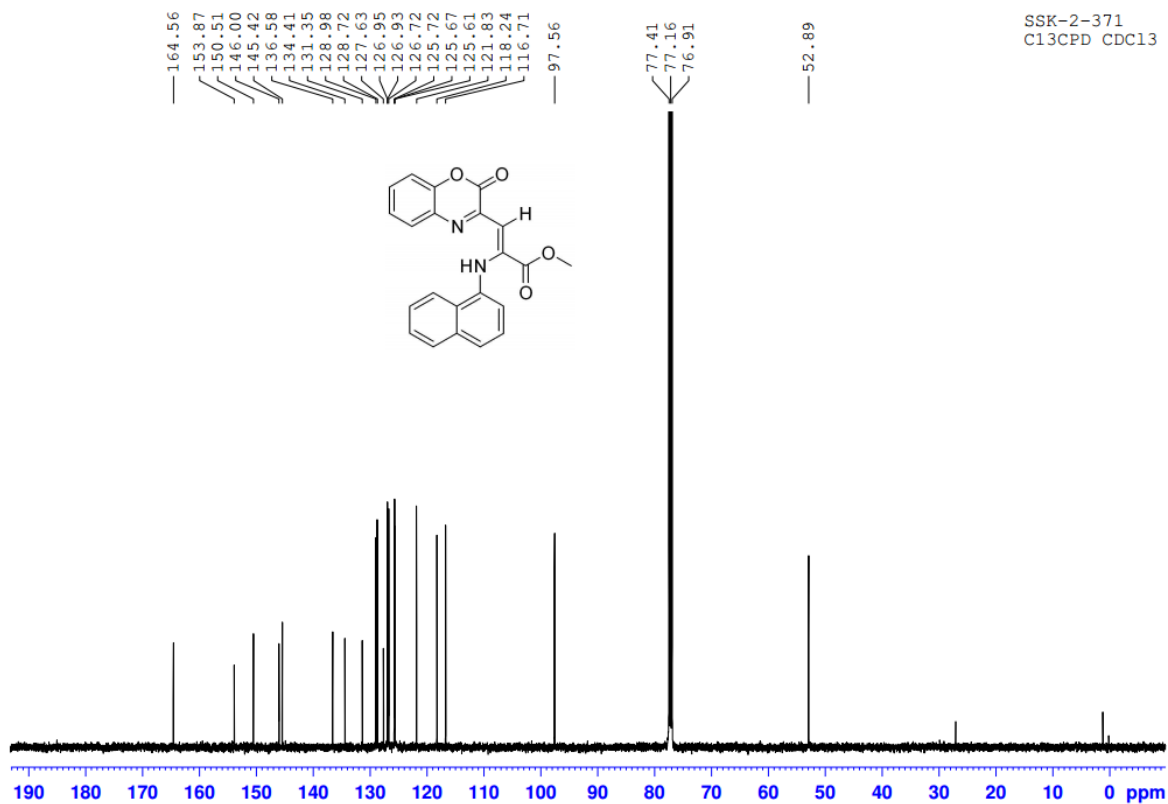

# Compound 4p

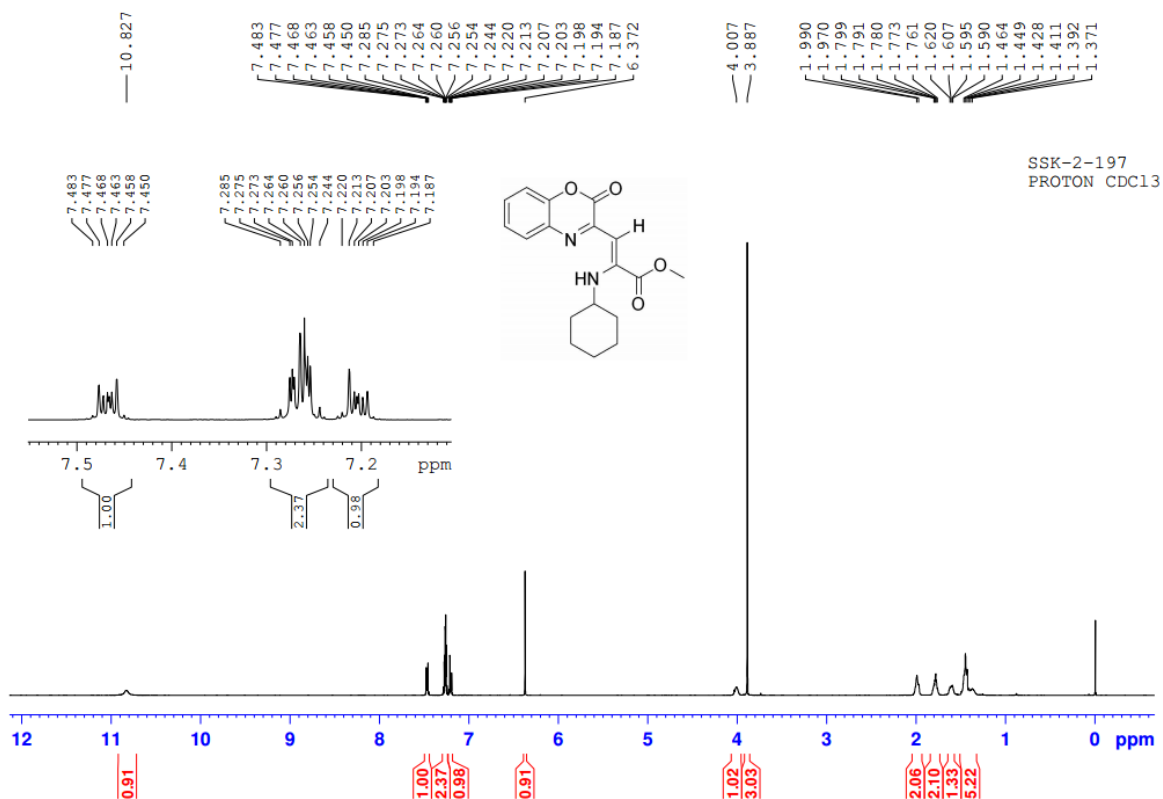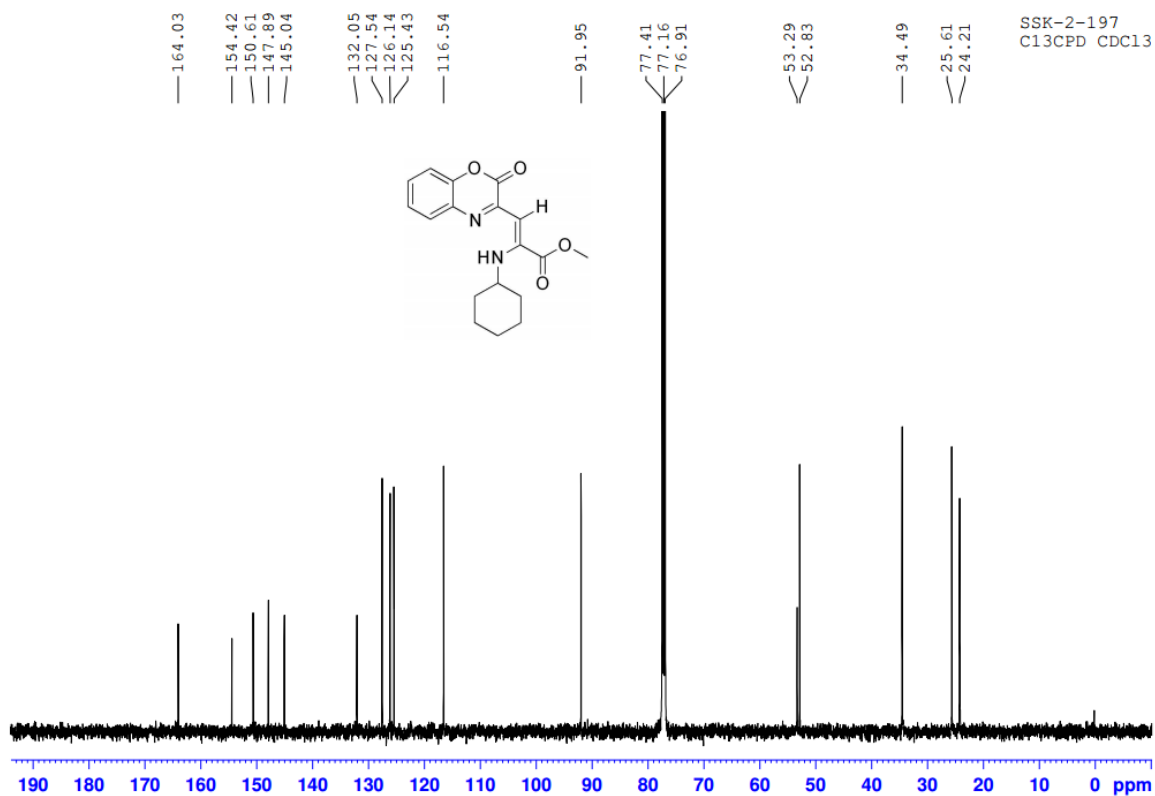



# Compound 4q

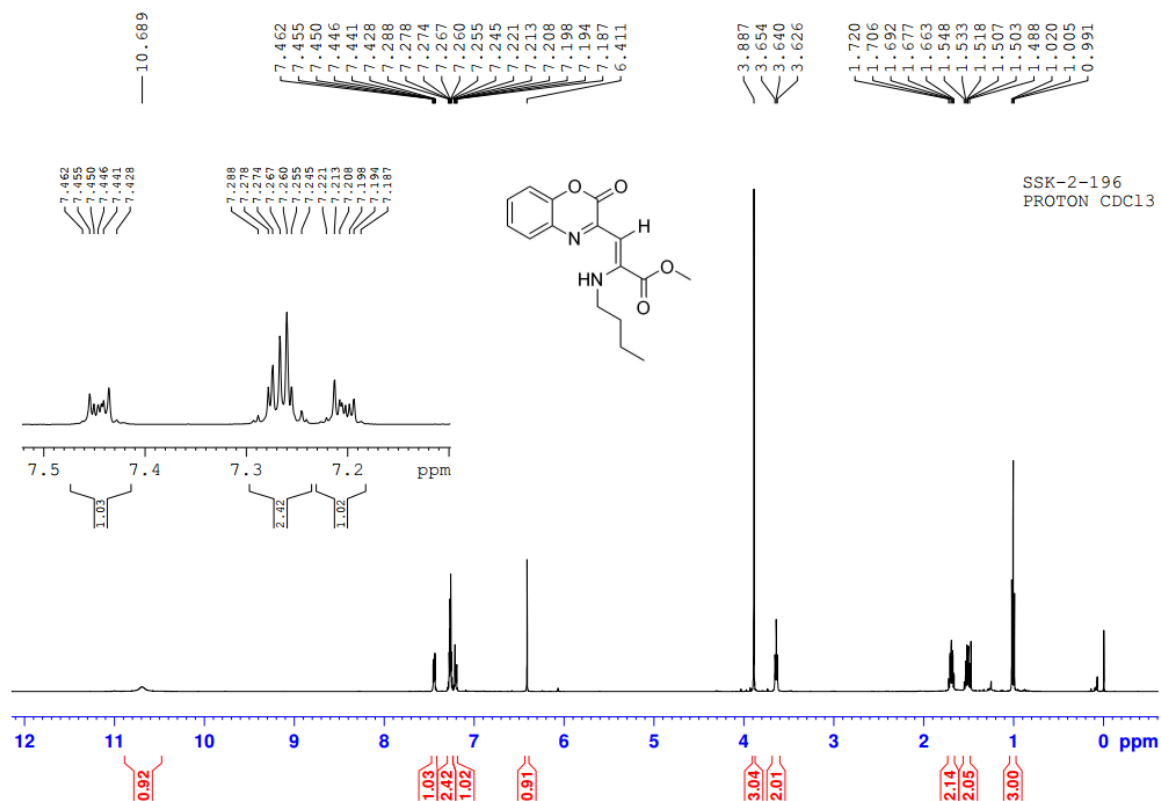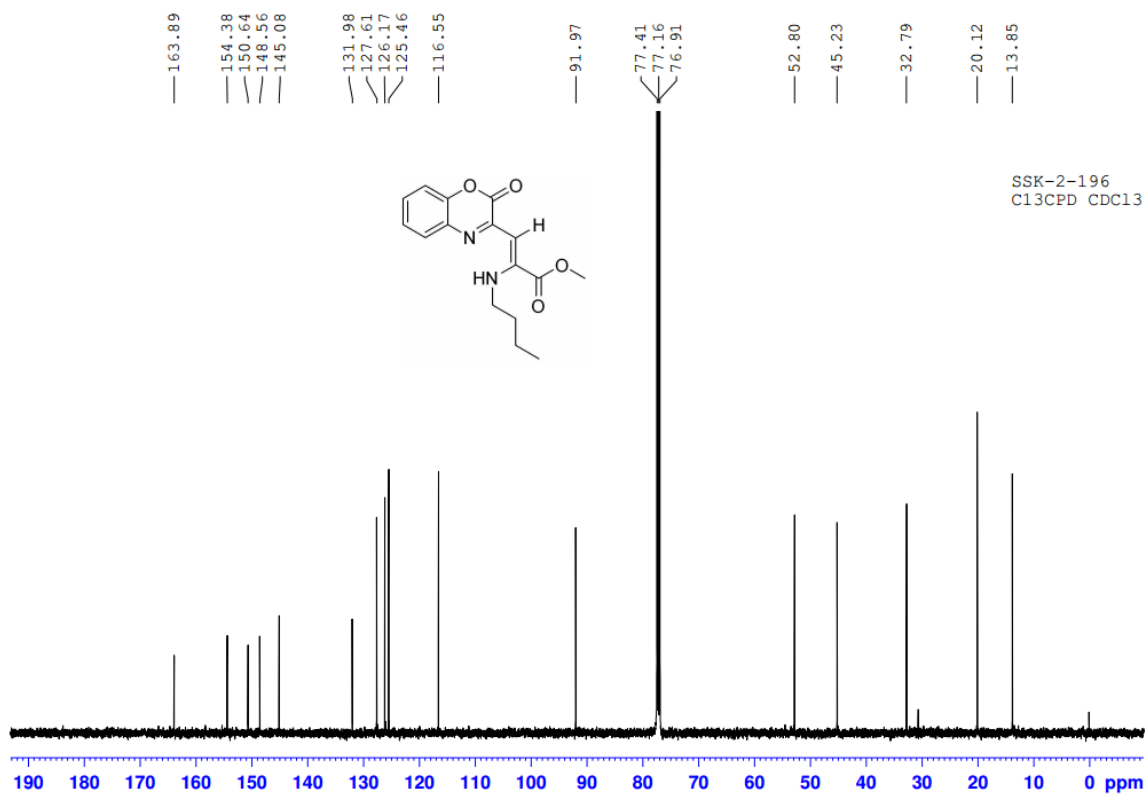

# Compound 4r

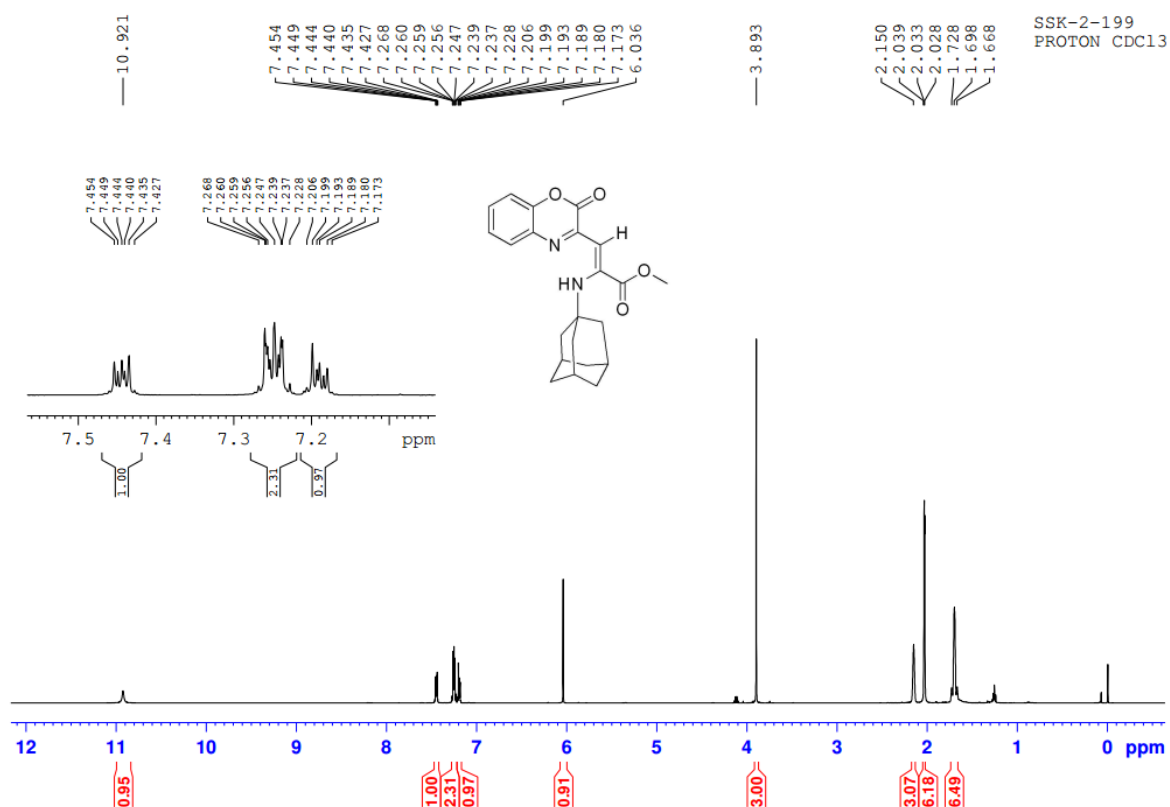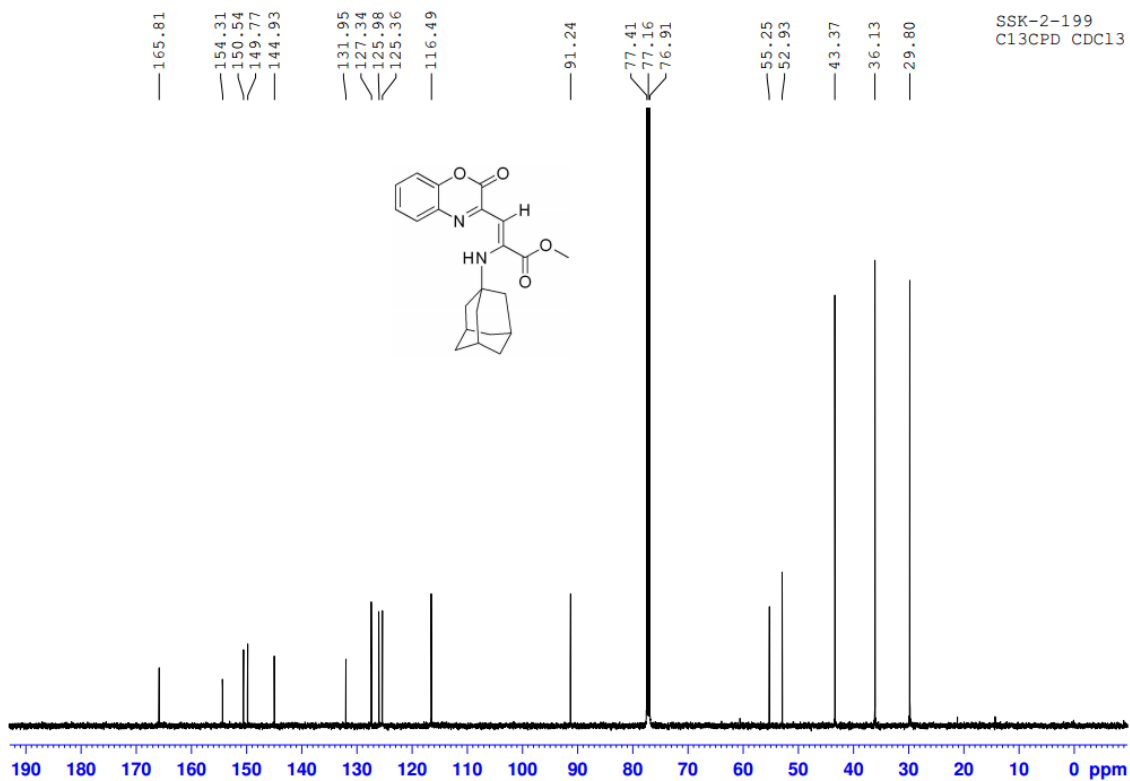

# Compound 4s

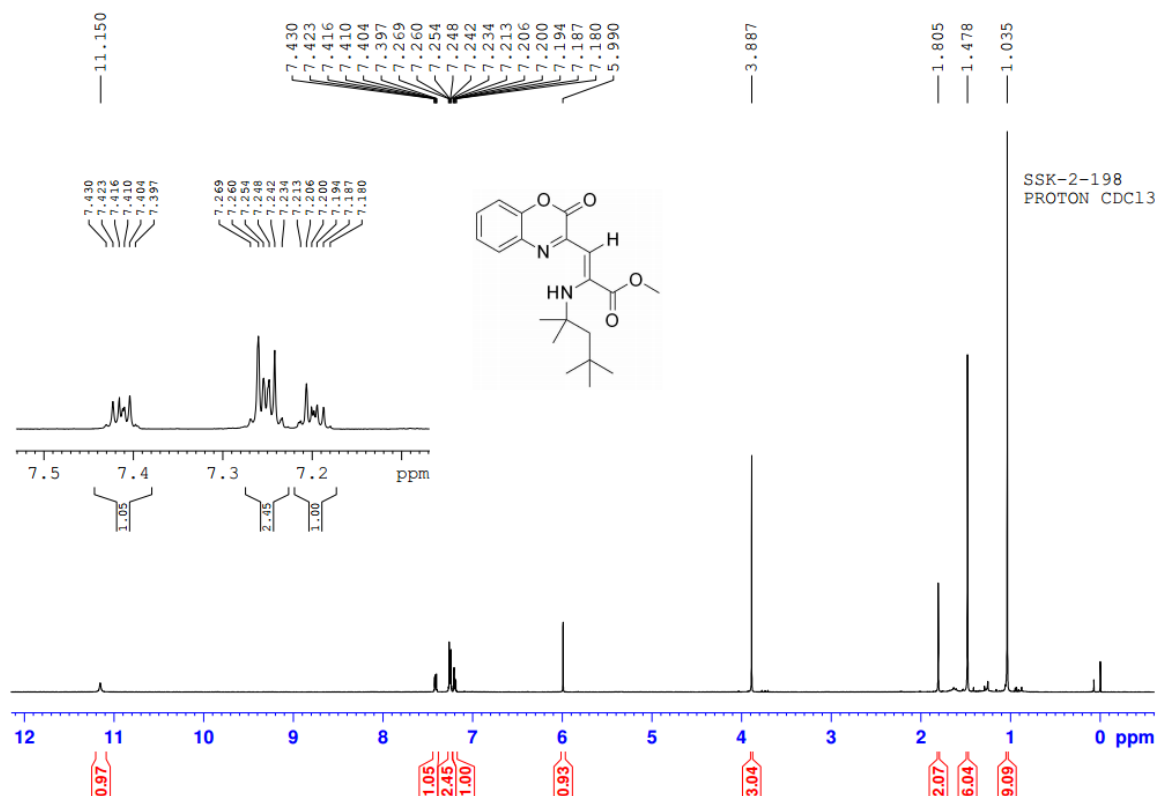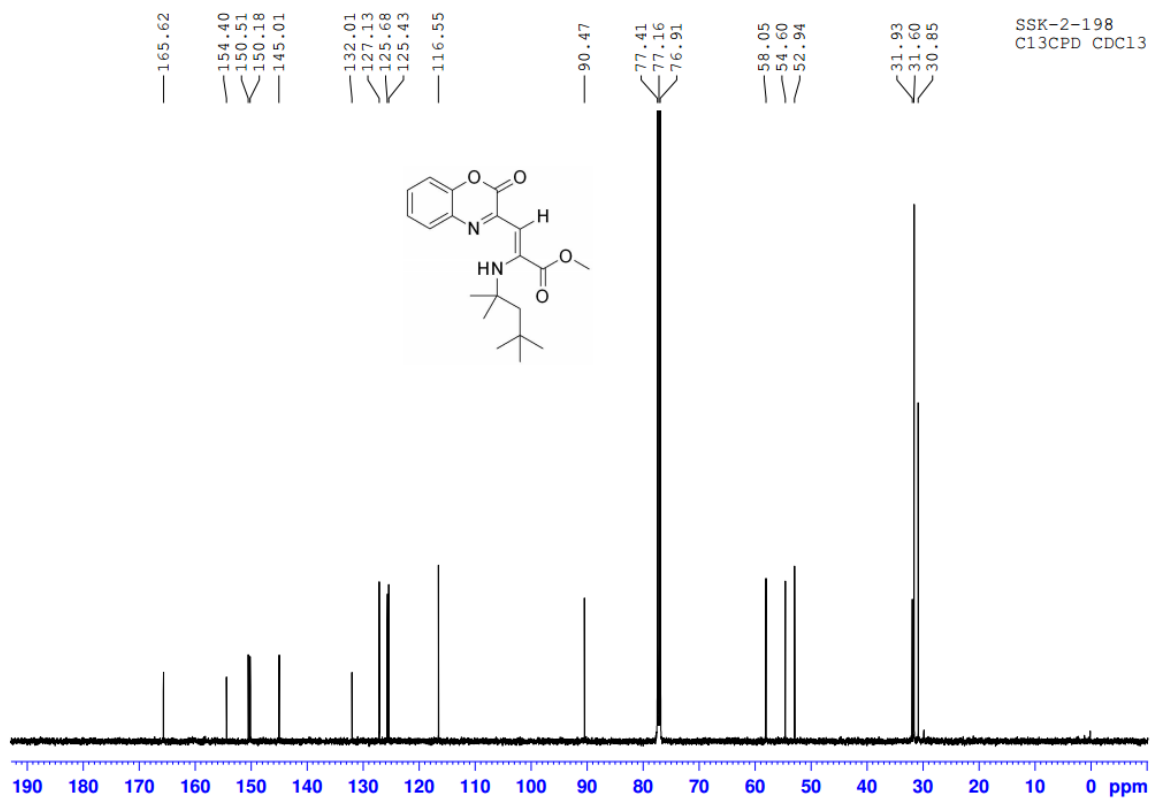

Supplement: c9cc06678k1.pdf [file c9cc06678k1.pdf]
